# Supplementary material for: Total synthesis of (−)-8-epi-chromazonarol enabled by a unique N2H4·H2O promoted intramolecular oxa-Michael cyclization reaction
Source: Royal Society of Chemistry journal article supplement (doi:10.1039/c8qo00901e), 2018-01-01

## Supporting Information for

### Total Synthesis of (-)-8-*epi*-Chromazonarol Enabled by a Unique N<sub>2</sub>H<sub>4</sub>•H<sub>2</sub>O

#### Promoted Intramolecular *oxa*-Michael Cyclization Reaction

Lin Liu,<sup>†</sup> Huayue Song,<sup>†</sup> Peng Chen, Ziyun Yuan, Shangbiao Feng, Weiwei Zhang,

Bowen Fang, Xingang Xie\*, Xuegong She

<sup>†</sup> L. Liu and H. Y. Song contributed equally

E-mail: xiexg@lzu.edu.cn

#### Contents

1. General experiment methods
2. Experimental procedures and characterization data of all synthetic new compounds
  - 2.1 Preparation and spectra data of aryl stannane **9**
  - 2.2 Preparation and spectra data of bicyclic triflate **10**
  - 2.3 Preparation and spectra data of  $\alpha$ ,  $\beta$ -unsaturated aryl ketone **14**
  - 2.4 Preparation and spectra data of cyclization precursor **8**
  - 2.5 Preparation and spectra data of tetracyclic ketone **7a** and **7a'**
  - 2.6 Spectra data of **8b-8d** and cyclization products **7b-7d**
  - 2.7 Preparation and spectra data of benzyl ether **18**
  - 2.8 Preparation and spectra data of compound **19**
  - 2.9 Preparation and spectra data of 8-*epi*-chromazonarol **2**
  - 2.10 Preparation and spectra data of ester **20**
  - 2.11 Spectra data of Intermediate **17**
  - 2.12 Comparison of the spectra data of synthetic (-)-8-*epi*-chromazonarol and those of natural product
3. Reference
4. NMR spectra of all synthetic new compounds

## 1. General Experimental Methods.

All reactions sensitive to air or moisture were carried out under argon atmosphere in dry and freshly distilled solvents under anhydrous conditions, unless otherwise noted. Column chromatography was performed on silica gel (200-300 mesh).  $^1\text{H}$  NMR and  $^{13}\text{C}$  NMR spectra were obtained using 300 and 75MHz, 400 and 101MHz, or 600 and 150MHz NMR spectrometers respectively. Chemical shifts ( $\delta$ ) are given in ppm with reference to solvent signals [ $^1\text{H}$  NMR:  $\text{CDCl}_3$  (7.26);  $^{13}\text{C}$  NMR:  $\text{CDCl}_3$  (77.0)]. The high resolution mass spectra (HRMS) were recorded on an FT-ICR mass spectrometer using electrospray ionization (ESI). Optical rotations were measured on a precision automated polarimeter. Melting points were measured on a melting point apparatus.

## 2. Experimental procedures and characterization data of all synthetic new compounds

### 2.1 Preparation and spectra data of aryl stannane **9**

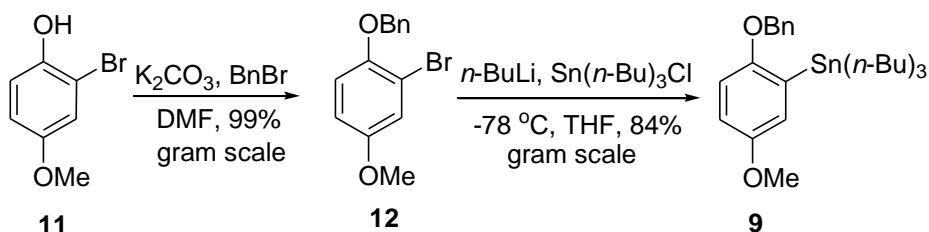

To a stirred solution phenol **11** (8.08 g, 40 mmol) in dry  $\text{DMF}$  (100 mL) was added  $\text{K}_2\text{CO}_3$  (6.07 g, 44 mmol) and  $\text{BnBr}$  (5.2 mL, 44 mmol) at room temperature. The resulting mixture was then stirred at room temperature for 12 h. After it was completed, the reaction mixture was quenched with saturated  $\text{NH}_4\text{Cl}_{\text{aq}}$  (5 mL) and extracted with  $\text{EtOAc}$  (50 mL  $\times$  3). The combined organic extract was washed with saturated brine, dried over anhydrous  $\text{Na}_2\text{SO}_4$ , filtered, concentrated to give a crude residue which was further purified by column chromatography on silica gel with

EtOAc/petroleum ether (1 : 50) as eluents to afford the corresponding known benzyl ether **12**<sup>1</sup> as yellow oil (11.53 g, 99%).

To a stirred solution of **12** (11.53 g, 39.5 mmol) in dry THF (100 mL) at -78 °C was added dropwise *n*-BuLi ( 2.5 M in *n*-hexane, 17.4 mL) under Ar. The resulting mixture was stirred at -78 °C for 3 h. Then (*n*-Bu)<sub>3</sub>SnCl (11.8 mL, 43.4 mmol) was added and the mixture was allowed to react at -78°C for another 1 h. After that, the cooling bath was removed and the mixture reacted at room temperature for 12 h. When the reaction was completed, it was quenched with saturated NH<sub>4</sub>Cl<sub>aq</sub> (50 mL) and extracted with EtOAc (80 mL × 3). The combined organic extract was washed with saturated brine, dried over anhydrous Na<sub>2</sub>SO<sub>4</sub>, filtered, concentrated to give a crude residue which was further purified by column chromatography on silica gel with EtOAc/petroleum (1 : 200) as eluents to afford the corresponding aryl stannane **9** as a colorless oil (16.72 g, 84%). <sup>1</sup>H NMR (400 MHz, CDCl<sub>3</sub>) δ = 7.41 – 7.31 (m, 5H), 6.96 (t, *J* = 1.6 Hz, 1H), 6.79 – 6.75 (m, 2H), 4.97 (s, 2H), 3.77 (s, 3H), 1.50 – 1.37 (m, 6H), 1.31 – 1.19 (m, 6H), 1.04 – 0.90 (m, 6H), 0.83 (t, *J* = 7.3 Hz, 9H) ppm. <sup>13</sup>C NMR (101 MHz, CDCl<sub>3</sub>) δ = 157.2, 153.7, 137.4, 132.0, 128.3, 128.3, 127.7, 127.7, 127.6, 123.1, 113.2, 110.1, 70.4, 55.6, 29.1, 29.1, 29.1, 27.4, 27.4, 27.4, 13.7, 13.7, 13.7, 9.8, 9.8, 9.8 ppm. HRMS(ESI) : *m/z* [M+H]<sup>+</sup> calcd for C<sub>26</sub>H<sub>41</sub>O<sub>2</sub>Sn : 505.2129, found : 505.2123.

## 2.2 Preparation and spectra data of bicyclic triflate **10**

### 2.2.1 The known bicyclic ketone **13** was prepared according to ref. 2

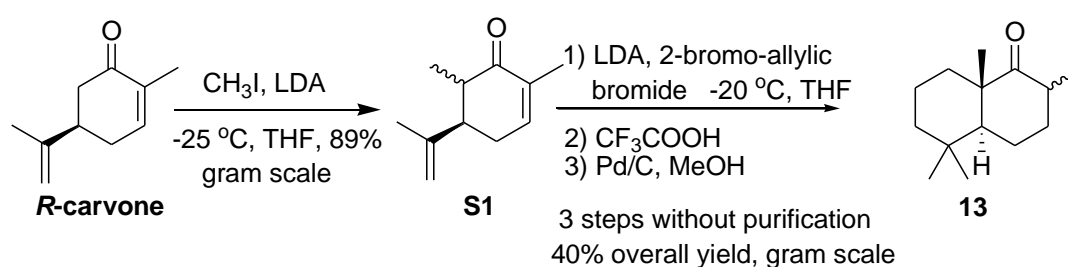

To a stirred solution of (*R*)-carvone (15.00 g, 100 mmol) in dry THF (30 mL) at -25 °C under Ar was added dropwise freshly prepared LDA (140 mmol in 70 mL dry THF). The resulting mixture was stirred at -25 °C for 2 h. Then it was added MeI (21.8 mL, 350 mmol) and allowed to react at -25 °C for 1 h. After that, the cooling bath was removed and the mixture reacted at room temperature for 12 h. When the reaction was completed, it was quenched with saturated NH<sub>4</sub>Cl<sub>aq</sub> (20 mL) and extracted with EtOAc (80 mL × 3). The combined organic extract was washed with saturated brine, dried over anhydrous Na<sub>2</sub>SO<sub>4</sub>, filtered, concentrated to give a crude residue which was further purified by column chromatography on silica gel with EtOAc/petroleum (1 : 200) as eluents to afford compound **S1** as yellow oil (14.62 g, 89%).

To a stirred solution of **S1** (6.30 g, 38.4 mmol) in dry THF (30 mL) at -20 °C under Ar was added dropwise freshly prepared LDA (57 mmol in 60 mL dry THF). The resulting mixture was stirred at -20 °C for 2 h, then it was added 2-bromo-allylic bromide (8 mL, 76.8 mmol) and allowed to react at -20 °C for 1 h. Then the cooling bath was removed and the mixture reacted at room temperature for 12 h. After the reaction was completed, it was quenched with saturated NH<sub>4</sub>Cl<sub>aq</sub> (20 mL) and extracted with EtOAc (80 mL × 3). The combined organic extract was washed with saturated brine, dried over anhydrous Na<sub>2</sub>SO<sub>4</sub>, filtered, concentrated to give a crude residue which was further treated with TFA (30 mL). After stirring for 3 days, it was quenched with saturated NaHCO<sub>3aq</sub> (40 mL) and extracted with EtOAc (40 mL × 3). The combined organic extract was washed with saturated brine, dried over anhydrous Na<sub>2</sub>SO<sub>4</sub>, filtered, concentrated to give a crude residue which was directly used in the subsequent hydrogenation reaction.

To a stirred solution of the obtained crude residue in 8 mL MeOH at autoclave,

Pd/C (10%, 1.50 g) was added. Then the autoclave was replaced with H<sub>2</sub> (20 atm) three times. Then the mixture was stirred at room temperature for 4 days. And the reaction mixture was filtered by celatom and concentrated to give crude residue, which was further purified by column chromatography on silica gel with EtOAc/petroleum (1 : 100) as eluents to afford compound **13** (3.20 g, 40% overall yields for 3 steps). The spectral data of compound **13** were in good agreement with that previously reported.<sup>2</sup>

### 2.2.2 Preparation and spectra data of bicyclic triflate **10**

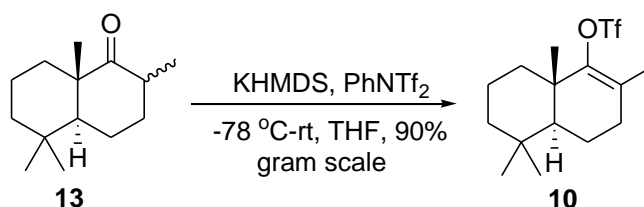

To a stirred solution of **13** (1.20 g, 5.8 mmol) in dry THF (25 mL) at -78 °C under Ar was added KHMDS (1 M, 14.4 mL, 14.4 mmol) dropwise. The resulting mixture was stirred at -78 °C for 2 h, then it was added the solution of PhNTf<sub>2</sub> (5.18 g, 14.4 mmol) in 20 mL dry THF. After it was complete, the reaction mixture was quenched with saturated NH<sub>4</sub>Cl<sub>aq</sub> (20 mL) and extracted with EtOAc (80 mL × 3). The organic extract was washed with saturated brine, dried over anhydrous Na<sub>2</sub>SO<sub>4</sub>, filtered, concentrated to give the crude residue, which was further purified by chromatography on silica gel with EtOAc/petroleum (1 : 200) to afford compound **10** as a colorless oil (1.77 g, 90%). [α]<sub>D</sub><sup>27</sup> = 38, (c = 1.0, CHCl<sub>3</sub>). <sup>1</sup>H NMR (400 MHz, CDCl<sub>3</sub>) δ = 2.23 – 2.07 (m, 2H), 1.82 (d, *J* = 12.9, 1H), 1.74 – 1.69 (m, 4H), 1.60 – 1.52 (m, 2H), 1.49 – 1.42 (m, 2H), 1.28 – 1.17 (m, 3H), 1.14 (s, 3H), 0.90 (s, 3H), 0.86 (s, 3H) ppm. <sup>13</sup>C NMR (101 MHz, CDCl<sub>3</sub>) δ = 152.0, 124.1, 117.1, 52.5, 41.2, 39.5, 34.7, 33.2, 33.1, 31.9, 21.4, 18.8, 18.3, 18.2, 17.5 ppm. HRMS(ESI) : *m/z* [M+H]<sup>+</sup> calcd for C<sub>15</sub>H<sub>24</sub>F<sub>3</sub>O<sub>3</sub>S : 341.1398, found : 341.1393.

### 2.3 Preparation and spectra data of $\alpha$ , $\beta$ -unsaturated aryl ketone **14**

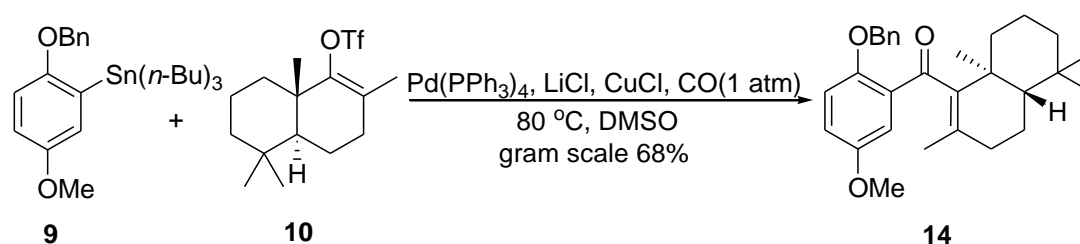

A dried vial (200 mL) with **9** (1.08 g, 2 mmol), **10** (680 mg, 2 mmol), Pd(PPh<sub>3</sub>)<sub>4</sub> (1.15 g, 1 mmol), LiCl (504 mg, 12 mmol) and CuCl (980 mg, 10 mmol) was added distilled DMSO (20 mL). Then it was evacuated and refilled with carbon monoxide three times by using tee joint and balloon. The resulting mixture was heated to 80 °C. After stirring for 8 h, the mixture was then cooled to 23 °C and filtered to remove the solid by celite and washed by EtOAc (200 mL). Then the organic phase was washed by water (100 mL) and saturated brine. The water layer was also washed by EtOAc (30 mL  $\times$  3) and the combined organic phase was dried over anhydrous Na<sub>2</sub>SO<sub>4</sub>, filtered, concentrated, and purified by silica gel with EtOAc/petroleum (1 : 100) to afford the corresponding ketone **14** as a white solid (588 mg, 68%). Mp: 85–88 °C.  $[\alpha]_D^{22} = 67$ , (c = 1.0, CHCl<sub>3</sub>). **<sup>1</sup>H NMR** (400 MHz, CDCl<sub>3</sub>)  $\delta$  = 7.38 – 7.23 (m, 6H), 6.92– 6.85 (m, 2H), 4.97 (s, 2H), 3.73 (s, 3H), 1.85 – 1.74 (m, 2H), 1.53 – 1.48 (m, 1H), 1.43 – 1.36 (m, 1H), 1.33 (s, 4H), 1.29 – 1.18 (m, 4H), 1.10 (s, 3H), 1.01 (m, 2H), 0.74 (s, 3H), 0.73 (s, 3H) ppm. **<sup>13</sup>C NMR** (101 MHz, CDCl<sub>3</sub>)  $\delta$  = 200.4, 153.2, 152.3, 145.3, 136.7, 130.3, 130.0, 128.5, 128.0, 128.0, 127.8, 127.8, 119.4, 115.8, 114.7, 71.2, 55.7, 49.9, 41.7, 37.9, 36.5, 33.1, 33.1, 32.1, 21.6, 21.1, 20.9, 18.6, 18.5 ppm. **HRMS(ESI)**: m/z [M+H]<sup>+</sup> calcd for C<sub>29</sub>H<sub>37</sub>O<sub>3</sub> : 433.2743, found : 433.2733.

### 2.4 Preparation and spectra data of cyclization precursor **8**

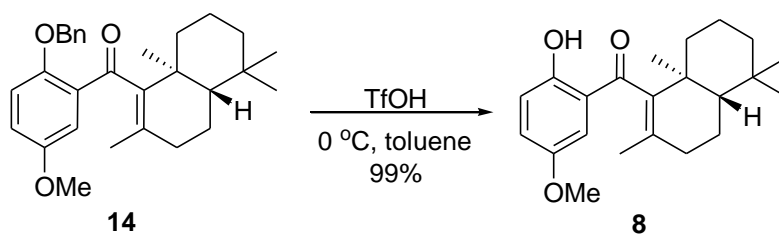

To a stirred solution of **14** (588 mg, 1.4 mmol) in dry toluene (7 mL) was added TfOH (0.37 mL, 4.2 mmol) at 0 °C. The resulting mixture was then stirred at 0 °C for 5 min. After the reaction was complete, the reaction mixture was quenched with saturated NaHCO<sub>3</sub>aq (10 mL) and extracted with EtOAc (20 mL×3). The organic extract was washed with saturated brine, dried over dried Na<sub>2</sub>SO<sub>4</sub>, filtered, concentrated to give the crude residue, which was further purified by chromatography on silica gel with EtOAc/petroleum (1 : 50) to afford the phenol **8** as a yellow solid (460 mg, 1.3 mmol, 99%). [ $\alpha$ ]<sub>D</sub><sup>22</sup> = 125, (c = 1.0, CHCl<sub>3</sub>). <sup>1</sup>H NMR (400 MHz, CDCl<sub>3</sub>)  $\delta$  = 12.05 (s, 1H), 7.09 (m, 2H), 6.94 – 6.91 (m, 1H), 3.77 (s, 3H), 2.23 – 2.17 (m, 2H), 1.83 – 1.78 (m, 1H), 1.68– 1.53 (m, 3H), 1.45 (s, 3H), 1.40 – 1.33 (m, 3H), 1.30 (s, 3H), 1.19 – 1.10 (m, 2H), 0.94 (s, 3H), 0.88 (s, 3H) ppm. <sup>13</sup>C NMR (101 MHz, CDCl<sub>3</sub>)  $\delta$  = 207.6, 156.9, 151.6, 141.2, 131.2, 123.2, 120.7, 119.0, 116.6, 56.0, 50.5, 41.8, 38.3, 37.1, 33.3, 31.9, 21.5, 21.5, 21.3, 20.9, 18.6, 18.5 ppm. HRMS (ESI): m/z [M+H]<sup>+</sup> calcd for C<sub>22</sub>H<sub>31</sub>O<sub>3</sub> : 343.2273, found : 343.2262.

## 2.5 Preparation and spectra data of tetracyclic ketone **7a** and **7a'**

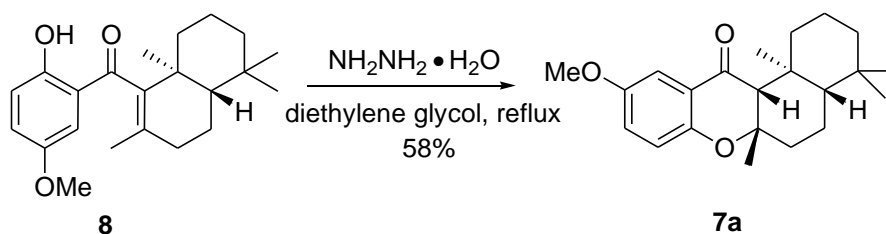

### 2.5.1 Preparation and spectra data of tetracyclic ketone **7a**

To a stirred solution phenol of **8** (265 mg, 0.77 mmol) in dry diethylene glycol (5 mL) was added hydrazine hydrate (80%, 1.4 mL, 23 mmol). The resulting mixture was

then heated to reflux. After the reaction was stirred for 12 h, the reaction mixture was quenched with saturated  $\text{NH}_4\text{Cl}_{\text{aq}}$  (5 mL). The mixture would be washed by 2 N HCl, then extracted with EtOAc (10 mL  $\times$  3). The organic extract was washed with saturated brine, dried over anhydrous  $\text{Na}_2\text{SO}_4$ , filtered, concentrated to give the crude residue, which was further purified by chromatography on silical gel with EtOAc/petroleum (1 : 50) to afford the ketone **7a** as a white solid (153 mg, 58%). Mp: 147 – 50 °C.  $[\alpha]_{\text{D}}^{25} = -69$ , ( $c = 1.0$ ,  $\text{CHCl}_3$ ).  $^1\text{H NMR}$  (400 MHz,  $\text{CDCl}_3$ )  $\delta = 7.29$  (d,  $J = 3.2$  Hz, 1H), 7.06 (dd,  $J = 9.0, 3.2$  Hz, 1H), 6.83 (d,  $J = 9.0$  Hz, 1H), 3.80 (s, 3H), 2.26 – 2.21 (m, 1H), 1.94 (s, 1H), 1.71– 1.65 (m, 3H), 1.60 – 1.52 (m, 2H), 1.47 – 1.40 (m, 3H), 1.25 – 1.18 (m, 6H), 0.92 (s, 3H), 0.90 (d,  $J = 2.2$  Hz, 1H), 0.84 (s, 6H) ppm.  $^{13}\text{C NMR}$  (101 MHz,  $\text{CDCl}_3$ )  $\delta = 194.9, 154.7, 153.4, 124.6, 122.0, 119.3, 106.7, 80.0, 64.6, 55.7, 54.3, 41.6, 40.0, 39.9, 38.4, 33.8, 33.4, 26.5, 22.0, 18.4, 18.1, 15.2$  ppm. **HRMS (ESI)** :  $m/z$   $[\text{M}+\text{H}]^+$  calcd for  $\text{C}_{22}\text{H}_{31}\text{O}_3$  : 343.2273, found : 343.2263.

### 2.5.2 Spectra data of **7a'**

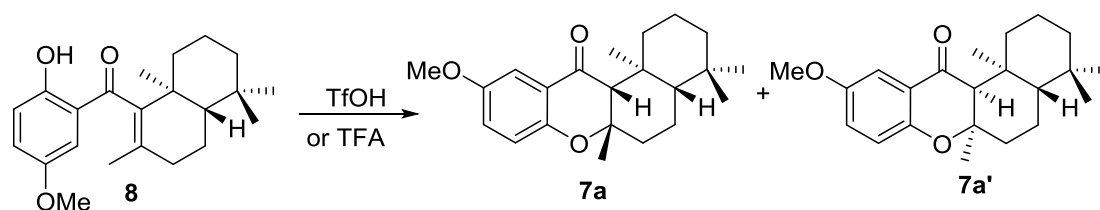

**7a'** and **7a** was obtained in 28% and 15% yields respectively as a 1:1 mixture when compound **8** was treated with TfOH or TFA in reflux toluene. **7a'**'s spectra data was shown as below.  $^1\text{H NMR}$  (600 MHz,  $\text{CDCl}_3$ )  $\delta = 7.25$  (d,  $J = 3.2$  Hz, 1H), 7.08 (dd,  $J = 9.0, 3.2$  Hz, 1H), 6.82 (d,  $J = 9.0$  Hz, 1H), 3.81 (s, 3H), 2.17 (s, 1H), 2.15 – 2.12 (m, 1H), 1.98 – 1.92 (m, 1H), 1.81 – 1.78 (m, 1H), 1.71 (dd,  $J = 12.3, 6.3$  Hz, 1H), 1.56 (d,  $J = 8.2$  Hz, 2H), 1.54 – 1.46 (m, 2H), 1.34 – 1.29 (m, 2H), 1.27 (s, 3H), 1.19 (s, 3H), 0.92 (dd,  $J = 13.2, 3.3$  Hz, 1H), 0.87 (s, 3H), 0.80 (s, 3H).  $^{13}\text{C NMR}$  (151 MHz,  $\text{CDCl}_3$ )



$\delta = 195.0, 154.0, 153.4, 125.4, 119.7, 119.4, 106.7, 80.4, 63.8, 55.7, 44.0, 41.7, 37.9, 37.5, 33.7, 33.4, 31.8, 27.0, 26.8, 21.8, 18.9, 17.4.$

## 2.6 Spectra data of **8b-8d** and cyclization products **7b-7d**

**8b-8d** was prepared in similar routes as **8** and treated by the standard cyclization conditions to afford **7b-7d**.

### 2.6.1 Spectra data of **8b** and **7b**

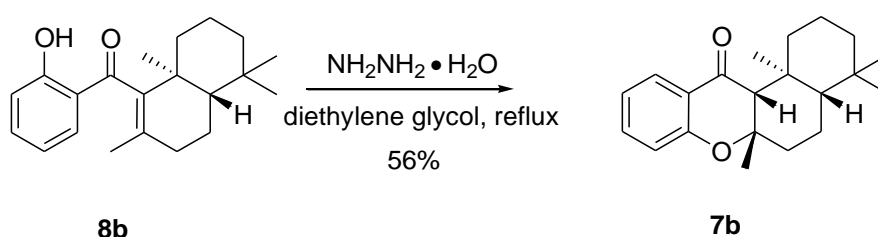

Compound **8b**, white solid, Mp: 106 – 109 °C,  $[\alpha]_{\text{D}}^{27} = 165$ , ( $c = 1.0$ ,  $\text{CHCl}_3$ ).  $^1\text{H}$  NMR (400 MHz,  $\text{CDCl}_3$ )  $\delta = 12.48$  (s, 1H), 7.59 (dd,  $J = 7.9, 1.1$  Hz, 1H), 7.46 – 7.42 (m, 1H), 6.97 (d,  $J = 8.3$  Hz, 1H), 6.87 (t,  $J = 7.5$  Hz, 1H), 2.26 – 2.12 (m, 2H), 1.83 – 1.78 (m, 1H), 1.65 – 1.53 (m, 2H), 1.42 (s, 3H), 1.40 – 1.33 (m, 4H), 1.31 (s, 3H), 1.20 – 1.10 (m, 2H), 0.95 (s, 3H), 0.88 (s, 3H) ppm.  $^{13}\text{C}$  NMR (101 MHz,  $\text{CDCl}_3$ )  $\delta = 208.0, 162.6, 141.3, 136.1, 133.3, 131.1, 121.1, 118.9, 118.3, 50.4, 41.8, 38.3, 37.1, 33.3, 33.3, 32.0, 21.5, 21.2, 20.9, 18.6, 18.5$  ppm. HRMS (ESI):  $m/z$   $[\text{M}+\text{H}]^+$  calcd for  $\text{C}_{21}\text{H}_{29}\text{O}_2$  : 313.2168, found : 313.2162.

Compound **7b** was obtained in 56% yield, white solid, Mp: 90 – 93 °C,  $[\alpha]_{\text{D}}^{27} = -19$ , ( $c = 1.0$ ,  $\text{CHCl}_3$ ).  $^1\text{H}$  NMR (300 MHz,  $\text{CDCl}_3$ )  $\delta = 7.84$  (dd,  $J = 7.8, 1.7$  Hz, 1H), 7.45 – 7.40 (m, 1H), 6.97 – 6.92 (m, 1H), 6.89 (dd,  $J = 8.3, 0.9$  Hz, 1H), 2.29– 2.23 (m, 1H), 1.97 (s, 1H), 1.77 – 1.60 (m, 3H), 1.61 – 1.51 (m, 2H), 1.48 – 1.39 (m, 3H), 1.24 (s, 3H), 1.19 – 1.15 (m, 1H), 0.95 – 0.90 (m, 4H), 0.85 (s, 3H), 0.84 (s, 3H) ppm.  $^{13}\text{C}$  NMR (75 MHz,  $\text{CDCl}_3$ )  $\delta = 194.8, 160.2, 135.5, 126.2, 122.5, 120.5, 118.1, 80.1,$

64.8, 54.3, 41.7, 40.0, 40.0, 38.4, 33.8, 33.4, 26.6, 22.0, 18.4, 18.1, 15.3 ppm. **HRMS**

**(ESI):**  $m/z$   $[M+Na]^+$  calcd for  $C_{21}H_{28}O_2Na$  : 335.1987, found : 335.1982.

### 2.6.2 Spectra data of **8c** and **7c**

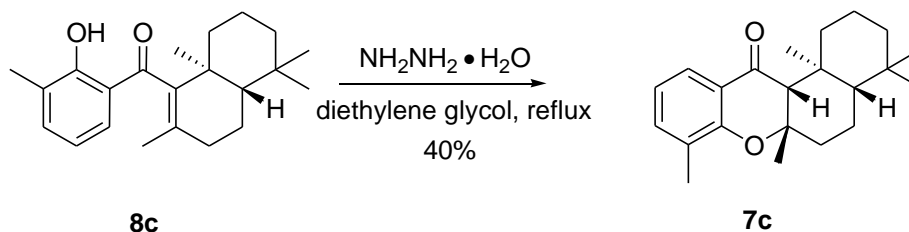

Compound **8c**, oil,  $[a]_D^{27} = 101$ , ( $c = 1.0$ ,  $CHCl_3$ ).  **$^1H$  NMR**(600 MHz,  $CDCl_3$ )  $\delta =$  12.78 (s, 1H), 7.44 (dd,  $J = 8.0, 0.9$  Hz, 1H), 7.31 (d,  $J = 7.2$  Hz, 1H), 6.77 (t,  $J = 7.6$  Hz, 1H), 2.27 (s, 3H), 2.21 – 2.13 (m, 2H), 1.81 – 1.78 (m, 1H), 1.64 – 1.53 (m, 2H), 1.45 – 1.40 (m, 4H), 1.37 – 1.32 (m, 2H), 1.31 (s, 3H), 1.18 – 1.09 (m, 2H), 0.93 (d,  $J = 15.0$  Hz, 3H), 0.88 (s, 3H) ppm.  **$^{13}C$  NMR** (151 MHz,  $CDCl_3$ )  $\delta =$  208.2, 161.1, 141.5, 136.9, 131.0, 131.0, 127.2, 120.4, 118.1, 50.3, 41.8, 38.3, 37.1, 33.2, 32.5, 31.9, 21.5, 21.2, 20.9, 18.6, 18.5, 15.3 ppm.

Compound **7c** was obtained in 40% yield, white solid, Mp: 126 – 130 °C,  $[a]_D^{27} = -13$ , ( $c = 1.0, CHCl_3$ ).  **$^1H$  NMR** (300 MHz,  $CDCl_3$ )  $\delta =$  7.69 (dd,  $J = 7.9, 1.2$  Hz, 1H), 7.29 (dd,  $J = 7.3, 0.8$  Hz, 1H), 6.83 (t,  $J = 7.6$  Hz, 1H), 2.32 – 2.27 (m, 1H), 2.21 (s, 3H), 1.95 (s, 1H), 1.82 – 1.73 (m, 1H), 1.70 – 1.62 (m, 3H), 1.58 – 1.50 (m, 1H), 1.48 – 1.40 (m, 3H), 1.26 (s, 1H), 1.22 (s, 3H), 0.95 – 0.90 (m, 4H), 0.85 (s, 3H), 0.81 (s, 3H) ppm.  **$^{13}C$  NMR** (75 MHz,  $CDCl_3$ )  $\delta =$  195.2, 158.3, 136.2, 127.2, 123.7, 122.0, 119.8, 79.7, 64.6, 54.3, 41.7, 40.1, 38.4, 33.8, 33.4, 29.7, 26.8, 22.1, 18.5, 18.1, 15.7, 15.2 ppm. **HRMS (ESI)** :  $m/z$   $[M+Na]^+$  calcd for  $C_{22}H_{30}O_2Na$  : 349.2143, found : 349.2138.

### 2.6.3 Spectra data of **8d** and **7d**

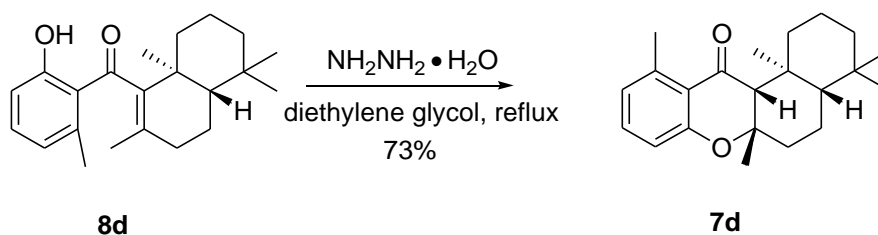

Compound **8d**, oil,  $[\alpha]_{\text{D}}^{25} = 117$ , ( $c = 1.0$ ,  $\text{CH}_2\text{Cl}_2$ ).  $^1\text{H NMR}$  (300 MHz,  $\text{CDCl}_3$ )  $\delta = 13.12$  (s, 1H), 7.26 (t,  $J = 7.9$  Hz, 1H), 6.85 (d,  $J = 8.2$  Hz, 1H), 6.66 (d,  $J = 7.4$  Hz, 1H), 2.49 (s, 3H), 2.20 (dd,  $J = 18.6, 6.6$  Hz, 1H), 2.13 – 1.99 (m, 1H), 1.82 – 1.50 (m, 5H), 1.44 (s, 3H), 1.39 – 1.33 (m, 2H), 1.31 (s, 3H), 1.19 (dd,  $J = 13.2, 3.3$  Hz, 2H), 0.94 (s, 3H), 0.89 (s, 3H) ppm.  $^{13}\text{C NMR}$  (75 MHz,  $\text{CDCl}_3$ )  $\delta = 207.3, 163.9, 144.6, 140.3, 135.0, 131.9, 123.1, 122.3, 117.0, 50.0, 41.9, 38.7, 35.7, 33.4, 33.3, 32.2, 23.4, 22.7, 21.6, 20.9, 18.8, 18.5$  ppm. **HRMS (ESI)**:  $m/z$   $[\text{M}+\text{H}]^+$  calcd for  $\text{C}_{22}\text{H}_{31}\text{O}_2$  : 327.2324, found: 327.2319.

Compound **7d** was obtained in 73% yield, oil,  $[\alpha]_{\text{D}}^{25} = -32$ , ( $c = 1.0$ ,  $\text{CH}_2\text{Cl}_2$ ).  $^1\text{H NMR}$  (400 MHz,  $\text{CDCl}_3$ )  $\delta = 7.26$  (t,  $J = 8.0$  Hz, 1H), 6.73 (t,  $J = 8.8$  Hz, 2H), 2.62 (s, 3H), 2.22 (d,  $J = 14.1$  Hz, 1H), 1.94 (s, 1H), 1.63 – 1.58 (m, 4H), 1.56 – 1.40 (m, 5H), 1.24 (s, 3H), 1.22 – 1.18 (m, 1H), 0.92 (s, 4H), 0.89 (s, 1H), 0.84 (s, 6H) ppm.  $^{13}\text{C NMR}$  (101 MHz,  $\text{CDCl}_3$ )  $\delta = 196.6, 161.3, 141.0, 134.1, 123.9, 120.8, 116.0, 79.1, 66.2, 54.2, 41.7, 40.3, 39.9, 38.1, 33.8, 33.4, 26.5, 23.1, 22.0, 18.5, 18.2, 15.5$  ppm. **HRMS (ESI)** :  $m/z$   $[\text{M}+\text{H}]^+$  calcd for  $\text{C}_{22}\text{H}_{31}\text{O}_2$  : 327.2324, found :327.2319.

## 2.7 Preparation and spectra data of benzyl ether **18**

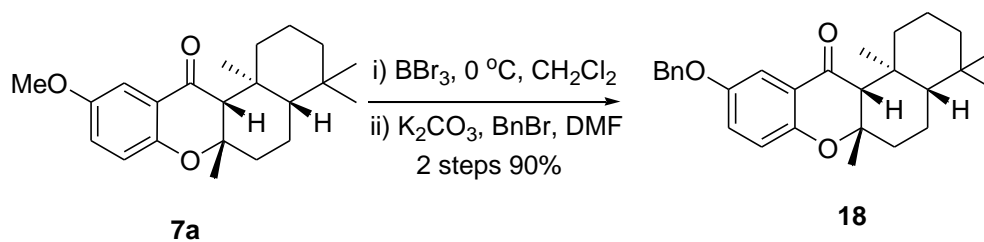

To a stirred solution of **7a** (153 mg, 0.45 mmol) in dry  $\text{CH}_2\text{Cl}_2$  (5 mL) at 0 °C under Ar was added  $\text{BBr}_3$  (0.087 mL, 0.90 mmol) dropwise. The resulting mixture

was allowed to warm to room temperature. After the reaction was stirred for 12 h, the reaction mixture was quenched with saturated  $\text{NaHCO}_{3\text{aq}}$  (10 mL) and extracted with EtOAc (20 mL $\times$ 3). The organic extract was washed with saturated brine, dried over dried  $\text{Na}_2\text{SO}_4$ , filtered, concentrated to give the crude residue, which was further treated with  $\text{K}_2\text{CO}_3$  (124 mg, 0.90 mmol) and BnBr (0.11 mL, 0.90 mmol). The resulting mixture was then stirred at room temperature for 12 h. After the reaction was complete, the reaction mixture was quenched with saturated  $\text{NH}_4\text{Cl}_{\text{aq}}$  (5 mL) and extracted with EtOAc (10 mL  $\times$  3). The organic extract was washed with saturated brine, dried over  $\text{Na}_2\text{SO}_4$ , filtered, concentrated to give the crude residue, which was further purified by chromatography on silica gel with EtOAc/petroleum (1 : 50) to afford the corresponding compound **18** as a yellow solid (169 mg, 90%). Mp: 123–127 °C,  $[\alpha]_{\text{D}}^{24} = -69$ , ( $c = 1.0$ ,  $\text{CHCl}_3$ ).  $^1\text{H NMR}$  (400 MHz,  $\text{CDCl}_3$ )  $\delta = 7.44 - 7.31(\text{m}, 6\text{H})$ , 7.12 (dd,  $J = 9.0, 3.2$  Hz, 1H), 6.83 (d,  $J = 9.0$  Hz, 1H), 5.03 (s, 2H), 2.26 – 2.21 (m, 1H), 1.94 (s, 1H), 1.75 – 1.64 (m, 3H), 1.62 – 1.51 (m, 2H), 1.49 – 1.41 (m, 3H), 1.23 (s, 3H), 1.21 – 1.18 (m, 1H), 0.93 (s, 3H), 0.90 (d,  $J = 2.1$  Hz, 1H), 0.85 (s, 6H) ppm.  $^{13}\text{C NMR}$  (101 MHz,  $\text{CDCl}_3$ )  $\delta = 194.8, 154.9, 152.7, 136.8, 128.5, 128.5, 128.0, 128.0, 127.7, 125.2, 122.1, 119.4, 108.2, 80.0, 70.6, 64.6, 54.3, 41.7, 40.1, 40.0, 38.5, 33.8, 33.4, 26.5, 22.0, 18.4, 18.1, 15.3$  ppm. **HRMS (ESI):**  $m/z$   $[\text{M}+\text{H}]^+$  calcd for  $\text{C}_{28}\text{H}_{35}\text{O}_3$ : 419.2586, found : 419.2571.

## 2.8 Preparation and spectra data of compound **19**

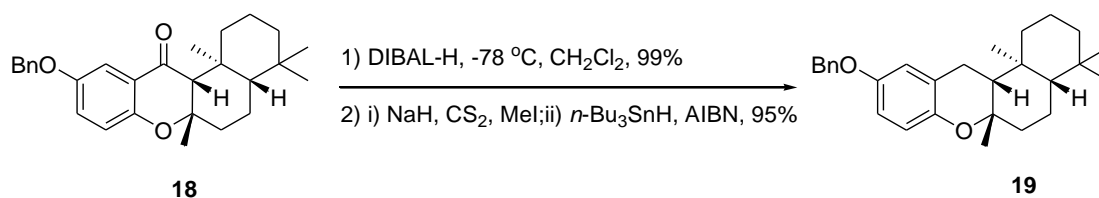

To a stirred solution of **18** (169 mg, 0.40 mmol) in dry  $\text{CH}_2\text{Cl}_2$  (3 mL) at  $-78$  °C under Ar was added DIBAL-H (1.5 M, 0.6 mL, 0.80 mmol) dropwise. The resulting mixture was stirred at  $-78$  °C for 20 h. After the reaction was complete, the reaction mixture

was quenched with CH<sub>3</sub>OH (0.1 mL) and the resulting mixture was added saturated seignettes salt<sub>aq</sub>. When the organic phase was clear, it was extracted with CH<sub>2</sub>Cl<sub>2</sub> (20 mL×3). The organic extract was washed with saturated brine, dried over Na<sub>2</sub>SO<sub>4</sub>, filtered, concentrated to give the crude residue, which was further purified by chromatography on silica gel with EtOAc/petroleum (1 : 10) to afford the corresponding alcohol as a colorless oil (168 mg, 99%).

To a stirred solution of the obtained alcohol (168 mg, 0.40 mmol) in dry THF (4 mL) at 0 °C under Ar was added NaH (60%, 48 mg, 1.20 mmol) in one portion. Carbon disulfide (0.24 mL, 4 mmol) was injected into the mixture by a syringe, then it was allowed to warm to room temperature and stir for another 0.5 h. Then the mixture was injected the iodomethane (0.25 mL, 4 mmol). After the reaction was complete, the reaction mixture was quenched with saturated NH<sub>4</sub>Cl<sub>aq</sub> (5 mL) and extracted with EtOAc (10 mL×3). The organic extract was washed with saturated brine, dried over dried Na<sub>2</sub>SO<sub>4</sub>, filtered, concentrated to give the crude residue, which was further to treat with *n*-Bu<sub>3</sub>SnH (0.22 mL, 0.8 mmol) and AIBN (33 mg, 0.2 mmol) in dry toluene (3 mL). This resulting mixture was allowed to react at 80 °C for 8 h. After the reaction was complete, the reaction mixture was quenched with saturated NH<sub>4</sub>Cl<sub>aq</sub> (5 mL) and extracted with EtOAc (10 mL×3). The organic extract was washed with saturated brine, dried over dried Na<sub>2</sub>SO<sub>4</sub>, filtered, concentrated to give the crude residue, which was further purified by chromatography on silica gel with EtOAc/petroleum (1 : 50) to afford **19** as a white solid (152 mg, 95%). Mp: 124-128 °C.  $[\alpha]_D^{25} = -32$ , (c = 1.0, CHCl<sub>3</sub>). <sup>1</sup>H NMR (400 MHz, CDCl<sub>3</sub>) δ = 7.44 – 7.31 (m, 5H), 6.73 – 6.64 (m, 3H), 4.97 (s, 2H), 2.90 (dd, *J* = 18.0, 8.1 Hz, 1H), 2.73 (d, *J* = 18.1 Hz, 1H), 2.14–2.09 (m, 1H), 1.83 (d, *J* = 12.5 Hz, 1H), 1.59 – 1.54 (m, 3H), 1.46 – 1.39 (m, 3H), 1.34 – 1.26 (m, 3H), 1.16 (s, 3H), 0.89 (s, 3H), 0.88 (s, 1H), 0.81 (s, 3H),

0.72 (s, 3H) ppm.  $^{13}\text{C}$  NMR (101 MHz,  $\text{CDCl}_3$ )  $\delta$  = 152.2, 148.8, 137.4, 128.5, 127.8, 127.8, 127.6, 127.6, 123.4, 117.4, 114.4, 113.3, 75.3, 70.5, 55.3, 49.5, 41.9, 40.7, 40.0, 38.3, 33.7, 33.2, 27.2, 23.0, 21.9, 18.4, 18.2, 14.2 ppm. **HRMS (ESI):**  $m/z$   $[\text{M}+\text{Na}]^+$  calcd for  $\text{C}_{28}\text{H}_{36}\text{O}_2\text{Na}$  : 427.2613, found : 427.2608.

## 2.9 Preparation and spectra data of 8-*epi*-chromazonarol **2**

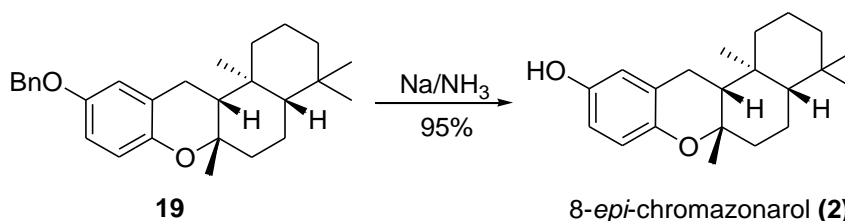

To a stirred solution of freshly prepared liquid  $\text{NH}_3$  (5 mL) in a two-necked bottle which was frozen by liquid nitrogen using a Dewar condenser at  $-78\text{ }^\circ\text{C}$  was added cut Na (60%, 146 mg, 3.8 mmol) in one portion. Then the mixture had a blue color and it was allowed to add the solution of **19** (154 mg, 0.38 mmol) in dry THF (3 mL). After the mixture stirred for 10 min, the reaction was carefully quenched with solid  $\text{NH}_4\text{Cl}$ . After evaporation of ammonia, the residue was taken in water (1 mL) and extracted with EtOAc (10 mL $\times$ 3). The organic extract was washed with saturated brine, dried over dried  $\text{Na}_2\text{SO}_4$ , filtered, concentrated to give the crude residue, which was further purified by chromatography on silica gel with EtOAc/petroleum (1 : 10) to afford **2** as a white solid (114 mg, 95%). Mp: 131-134  $^\circ\text{C}$ .  $[\alpha]_{\text{D}}^{25} = -30$ , ( $c = 1.0$ ,  $\text{CCl}_4$ ).  $^1\text{H}$  NMR (600 MHz,  $\text{CDCl}_3$ )  $\delta$  = 6.61 – 6.59 (m, 1H), 6.55 – 6.53 (m, 2H), 4.45 (s, 1H), 2.87 (dd,  $J = 18.0, 8.1$  Hz, 1H), 2.70 (d,  $J = 18.0$  Hz, 1H), 2.13 – 2.09 (m, 1H), 1.82 (d,  $J = 11.9$  Hz, 1H), 1.64 – 1.60 (m, 2H), 1.58 – 1.52 (m, 3H), 1.43 – 1.39 (m, 2H), 1.29 – 1.26 (m, 2H), 1.15 (s, 3H), 0.90 (s, 3H), 0.86 (dd,  $J = 13.0, 3.3$  Hz, 1H), 0.82 (s, 3H), 0.72 (s, 3H) ppm.  $^{13}\text{C}$  NMR (151 MHz,  $\text{CDCl}_3$ )  $\delta$  = 148.7, 148.6, 123.6, 117.6, 114.7, 113.8, 75.3, 55.3, 49.6, 41.9, 40.7, 40.1, 38.3, 33.7, 33.2, 27.1, 22.9, 21.9, 18.5, 18.3, 14.2 ppm. **HRMS (ESI):**  $m/z$   $[\text{M}+\text{H}]^+$  calcd for  $\text{C}_{21}\text{H}_{31}\text{O}_2$  :

315.2324, found : 315.2311.

## 2.10 Preparation and spectra data of ester **20**

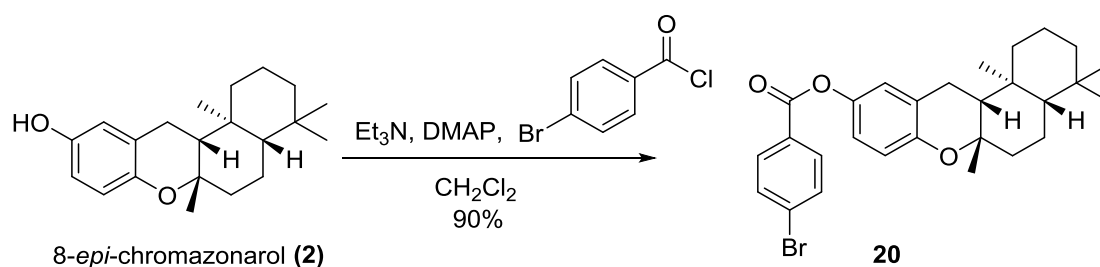

To a stirred solution phenol of **2** (16 mg, 0.05 mmol) in dry CH<sub>2</sub>Cl<sub>2</sub> (0.5 mL) was added DMAP (1 mg, 0.005 mmol) and Et<sub>3</sub>N (0.02 mL, 0.15 mmol) and 4-bromobenzoyl chloride (84 mg, 0.2 mmol). The resulting mixture was then stirred at room temperature for 15 min. After the reaction was complete, the reaction mixture was quenched with saturated NH<sub>4</sub>Cl<sub>aq</sub> (5 mL) and extracted with EtOAc (5 mL×3). The organic extract was washed with saturated brine, dried over dried Na<sub>2</sub>SO<sub>4</sub>, filtered, concentrated to give the crude residue, which was further purified by chromatography on silical gel with EtOAc/petroleum (1 : 50) to afford **25** as a white solid (22 mg, 90% yield). [α]<sub>D</sub><sup>25</sup> = -44, (c = 1.0, CH<sub>2</sub>Cl<sub>2</sub>). <sup>1</sup>H NMR (300 MHz, CDCl<sub>3</sub>) δ = 8.05 – 7.98 (m, 2H), 7.69 – 7.62 (m, 2H), 6.89 – 6.85(m, 2H), 6.75 (d, *J* = 8.2 Hz, 1H), 2.95 (dd, *J* = 18.2, 8.0 Hz, 1H), 2.76 (d, *J* = 18.1 Hz, 1H), 2.17 – 2.13 (m, 1H), 1.82 (d, *J* = 12.3 Hz, 1H), 1.63 – 1.53 (m, 4H), 1.43 – 1.31 (m, 4H), 1.18 (s, 3H), 1.15 – 1.09 (m, 1H), 0.93 (s, 1H), 0.90 (s, 3H), 0.82 (s, 3H), 0.73 (s, 3H) ppm. <sup>13</sup>C NMR (75 MHz, CDCl<sub>3</sub>) δ = 164.8, 152.6, 143.5, 131.9, 131.6, 128.8, 128.6, 123.5, 121.0, 119.6, 117.7, 75.8, 55.3, 49.4, 41.9, 40.7, 40.0, 38.4, 33.7, 33.2, 27.3, 22.9, 21.9, 18.4, 18.3, 14.3 ppm. HRMS (ESI): *m/z* [M+H]<sup>+</sup> calcd for C<sub>28</sub>H<sub>34</sub>BrO<sub>3</sub>: 497.1691, found : 497.1686.

## 2.11 Spectra data of Intermediate **17**

Compound **17** was obtained in 21% yield when the *oxa*-Michael cyclization

reaction was quenched in 1 h. **17**'s spectra data was shown as below. **<sup>1</sup>H NMR** (400 MHz, CDCl<sub>3</sub>)  $\delta$  = 7.24 (d,  $J$  = 3.2 Hz, 1H), 7.02 (dd,  $J$  = 8.9, 3.2 Hz, 1H), 6.78 (d,  $J$  = 8.9 Hz, 1H), 3.78 (s, 3H), 2.71 (d,  $J$  = 11.5 Hz, 2H), 2.09 – 2.05 (m, 1H), 1.97 – 1.90 (m, 1H), 1.80 – 1.65 (m, 2H), 1.56 (s, 1H), 1.47 – 1.40 (m, 3H), 1.37 (s, 3H), 1.26 (s, 1H), 1.20 (dd,  $J$  = 13.8, 4.5 Hz, 1H), 1.14 (s, 3H), 1.01 – 0.95 (m, 2H), 0.91 (s, 3H), 0.86 (s, 3H) ppm. **<sup>13</sup>C NMR** (101 MHz, CDCl<sub>3</sub>)  $\delta$  = 194.1, 153.4, 153.2, 124.0, 121.9, 118.9, 107.5, 82.8, 65.0, 55.7, 55.6, 41.9, 40.9, 39.8, 37.3, 33.6, 33.4, 21.7, 21.2, 19.4, 18.4, 15.6 ppm.

2.12 Comparison of the spectra data of synthetic (-)-8-*epi*-chromazonarol and those of natural product

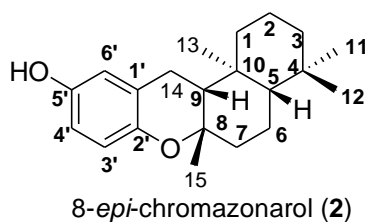

2.12.1 Comparisons of their <sup>13</sup>C NMR spectra data (ppm)

| number | Synthetic 8- <i>epi</i> -chromazonarol | Natural 8- <i>epi</i> -chromazonarol | $\Delta$ |
|--------|----------------------------------------|--------------------------------------|----------|
| 1      | 40.1                                   | 39.9                                 | 0.2      |
| 2      | 18.3                                   | 18.1                                 | 0.2      |
| 3      | 40.7                                   | 40.5                                 | 0.2      |
| 4      | 33.2                                   | 33.0                                 | 0.2      |
| 5      | 55.3                                   | 55.1                                 | 0.2      |
| 6      | 18.5                                   | 18.3                                 | 0.2      |
| 7      | 41.9                                   | 41.8                                 | 0.1      |
| 8      | 75.3                                   | 75.2                                 | 0.1      |
| 9      | 49.6                                   | 49.4                                 | 0.2      |
| 10     | 38.3                                   | 38.1                                 | 0.2      |
| 11     | 33.7                                   | 33.5                                 | 0.2      |
| 12     | 21.9                                   | 21.7                                 | 0.2      |
| 13     | 14.2                                   | 14.1                                 | 0.1      |
| 14     | 22.9                                   | 22.7                                 | 0.2      |
| 15     | 27.1                                   | 27.0                                 | 0.1      |
| 1'     | 123.6                                  | 123.3                                | 0.3      |
| 2'     | 148.7                                  | 148.5                                | 0.2      |
| 3'     | 117.6                                  | 117.3                                | 0.3      |
| 4'     | 113.8                                  | 113.8                                | 0        |
| 5'     | 148.6                                  | 148.2                                | 0.4      |
| 6'     | 114.7                                  | 114.8                                | -0.1     |

2.12.2 Comparisons of their partial <sup>1</sup>H NMR spectra data (the isolation literature only reported partial of <sup>1</sup>H NMR spectra data of natural 8-*epi*-chromazonarol)



| number  | Synthetic 8- <i>epi</i> -chromazonarol                                         | Natural 8- <i>epi</i> -chromazonarol                                          | $\Delta$        |
|---------|--------------------------------------------------------------------------------|-------------------------------------------------------------------------------|-----------------|
| 11      | 0.72(s, 3H)                                                                    | 0.72(s, 3H)                                                                   | 0               |
| 12      | 0.82(s, 3H)                                                                    | 0.82(s, 3H)                                                                   | 0               |
| 13      | 0.90(s, 3H)                                                                    | 0.90(s, 3H)                                                                   | 0               |
| 14      | 2.70(d, 1H <sub>a</sub> , J = 18Hz); 2.87(dd, 1H <sub>b</sub> , J = 6Hz, 18Hz) | 2.72(d, 1H <sub>a</sub> , J = 17 Hz); 2.89(d,d, 1H <sub>b</sub> , J = 17.7Hz) | -0.02;<br>-0.01 |
| 15      | 1.15(s, 3H)                                                                    | 1.16(s, 3H)                                                                   | -0.01           |
| 3'      | 6.61-6.59(m, 1H)                                                               | 6.57(m, 1H)                                                                   | -0.03           |
| 4'      | 6.55(m, 1 H )                                                                  | 6.57(m, 1H)                                                                   | -0.02           |
| 5'(-OH) | 4.45(br, s, 1H)                                                                | 4.75(br, s, 1H)                                                               | -0.3            |
| 6'      | 6.53(m,1H)                                                                     | 6.57(m,1H)                                                                    | -0.04           |

### 2.12.3 Comparisons of their physical data and MS data

| data                      | Synthetic 8- <i>epi</i> -chromazonarol                                      | Natural 8- <i>epi</i> -chromazonarol |
|---------------------------|-----------------------------------------------------------------------------|--------------------------------------|
| Mp                        | 131-134°C                                                                   | 132-134°C                            |
| [ $\alpha$ ] <sub>D</sub> | [ $\alpha$ ] <sub>D</sub> <sup>20</sup> = -30, (c = 1.0, CCl <sub>4</sub> ) | -2, (c = 1.0, CCl <sub>4</sub> )     |
| MS                        | 315.2311(M+H <sup>+</sup> )                                                 | 314.2250                             |

### 3. References

1. J. Oshita, Y. Noguchi, A. Watanabe, G. Sennari, S. Sato, T. Hirose, D. Oikawa, Y. Inahashi, M. Iwatsuki, A. Ishiyama, S. Ōmura, Toshiaki Sunazuka, *Tetrahedron Lett.* 2016, **57**, 357.
2. J. P. Gesson, J. C. Jacquesy and B. Renoux, *Tetrahedron*, 1989, **45**, 5853.

### 4. NMR spectra of all synthetic new compounds.

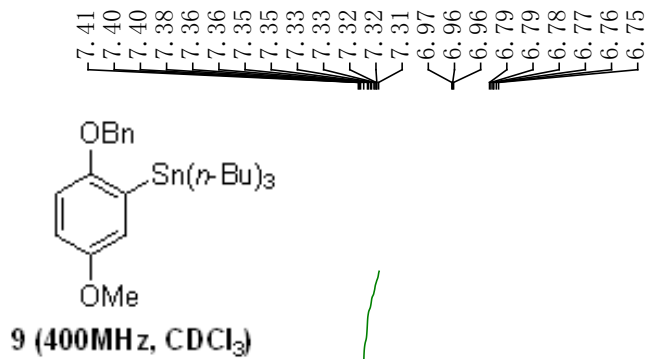

7.41  
 7.40  
 7.40  
 7.38  
 7.36  
 7.36  
 7.35  
 7.35  
 7.33  
 7.33  
 7.32  
 7.32  
 7.31  
 6.97  
 6.96  
 6.96  
 6.79  
 6.79  
 6.78  
 6.77  
 6.76  
 6.75

4.97

3.77

1.50  
 1.48  
 1.46  
 1.46  
 1.44  
 1.43  
 1.43  
 1.42  
 1.42  
 1.40  
 1.38  
 1.30  
 1.28  
 1.26  
 1.24  
 1.23  
 1.21  
 1.21  
 1.04  
 1.02  
 0.99  
 0.98  
 0.97  
 0.97  
 0.95  
 0.94  
 0.92  
 0.85  
 0.83  
 0.81

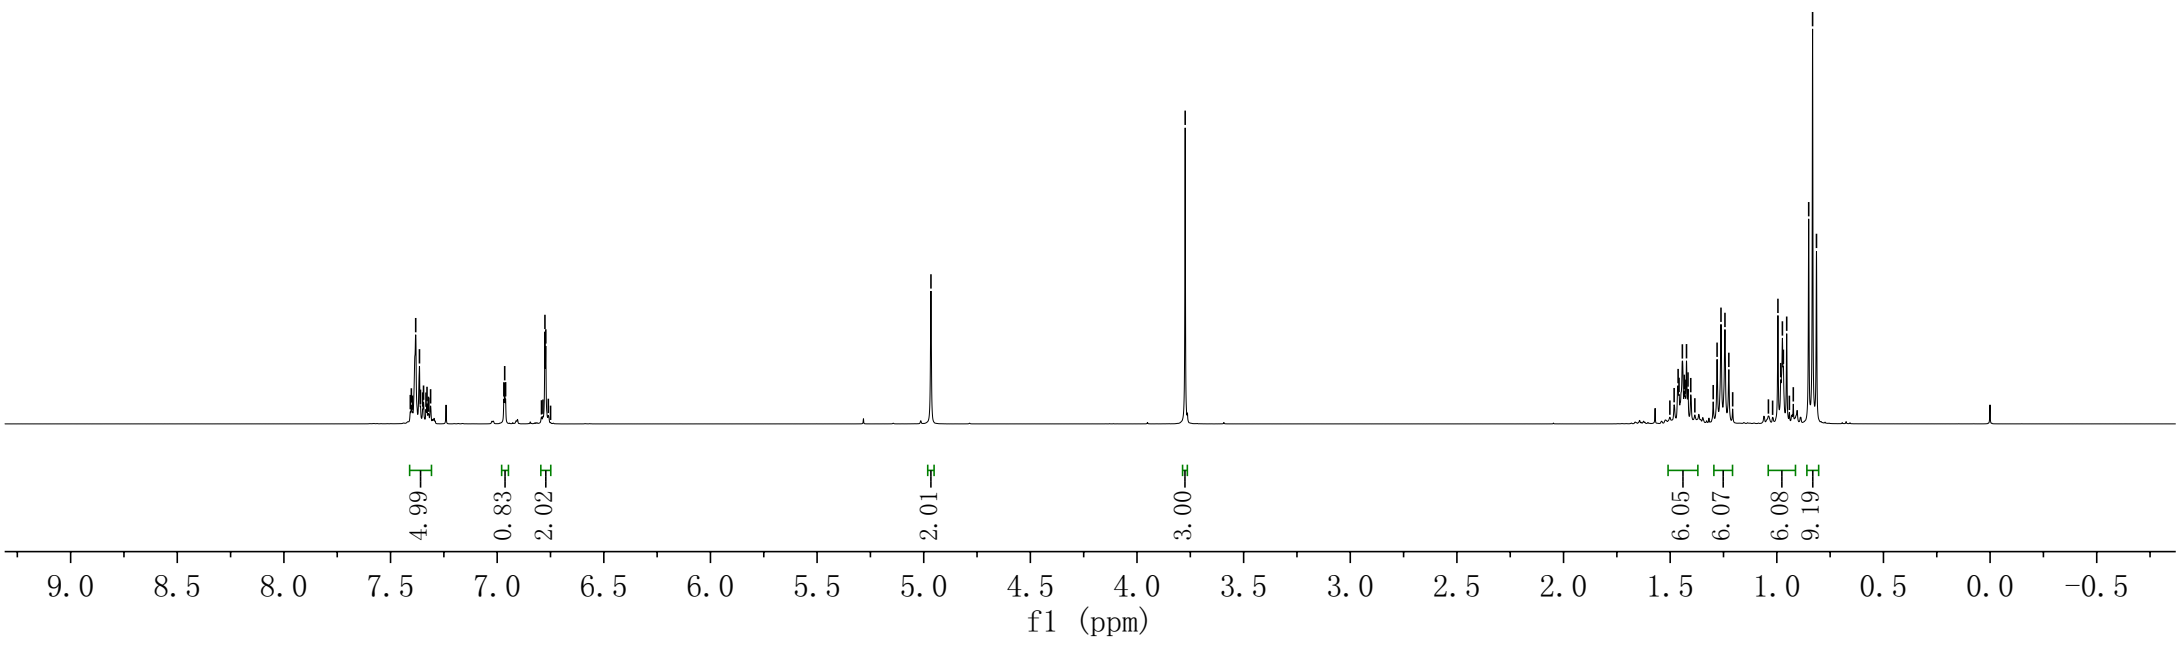

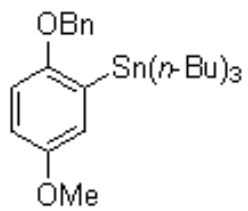

9 (101MHz, CDCl<sub>3</sub>)

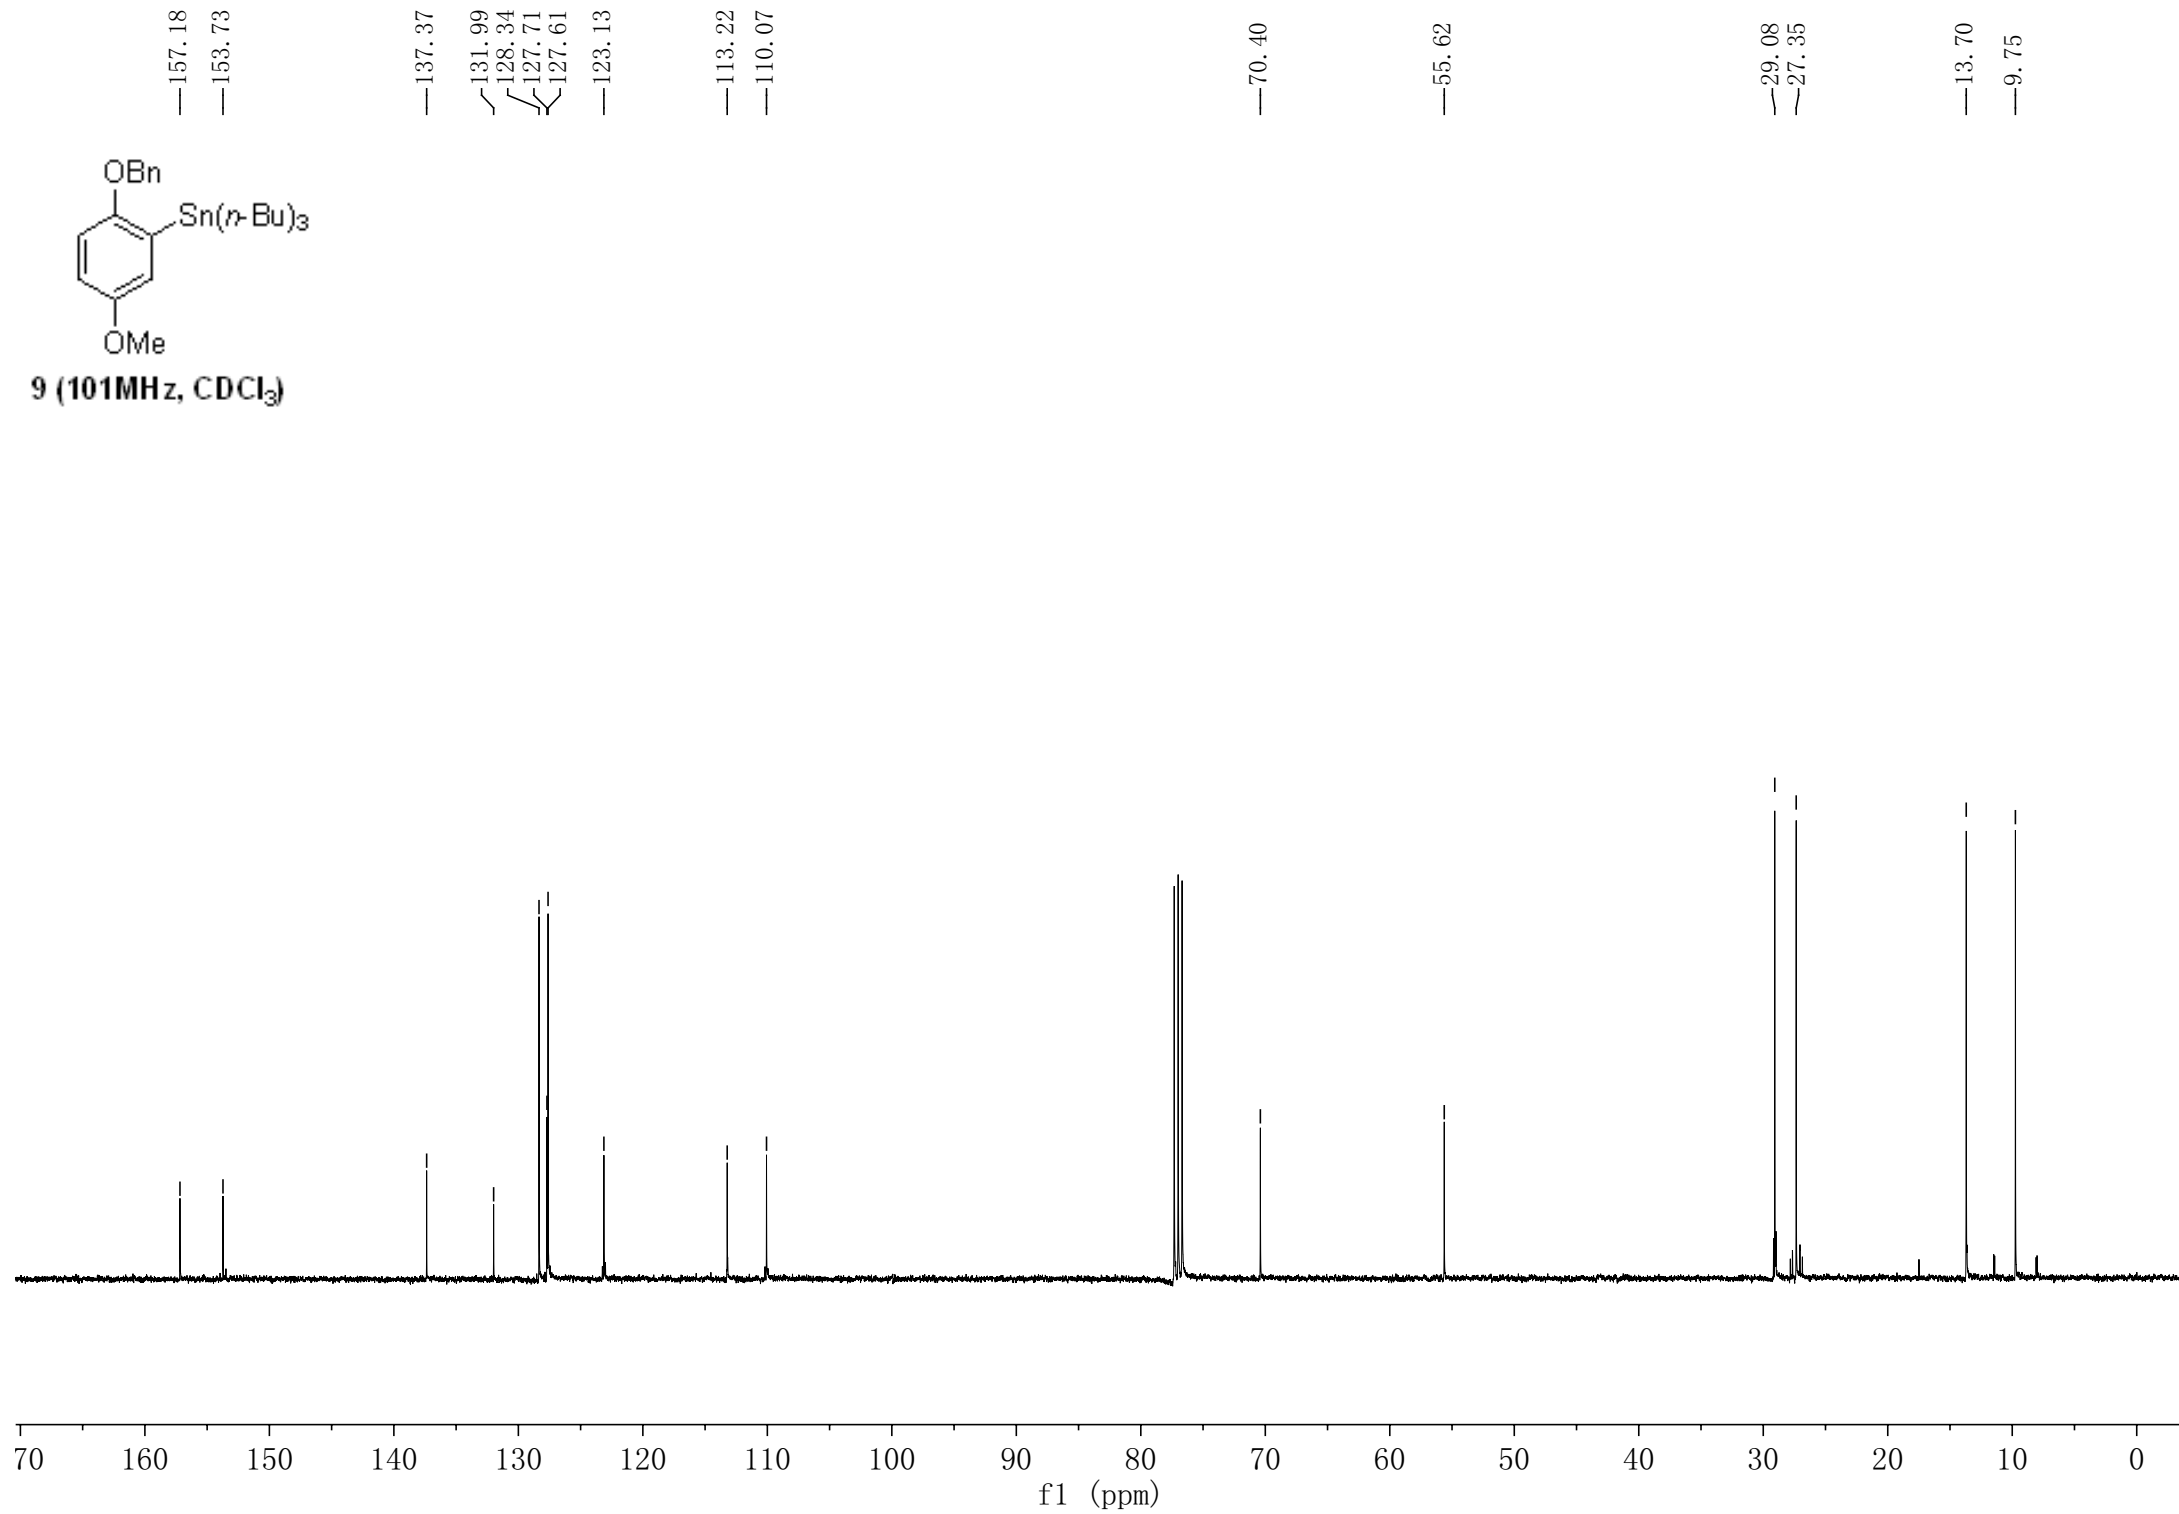

化合物9

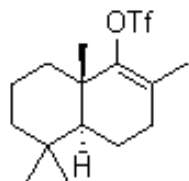

10 (400MHz, CDCl<sub>3</sub>)

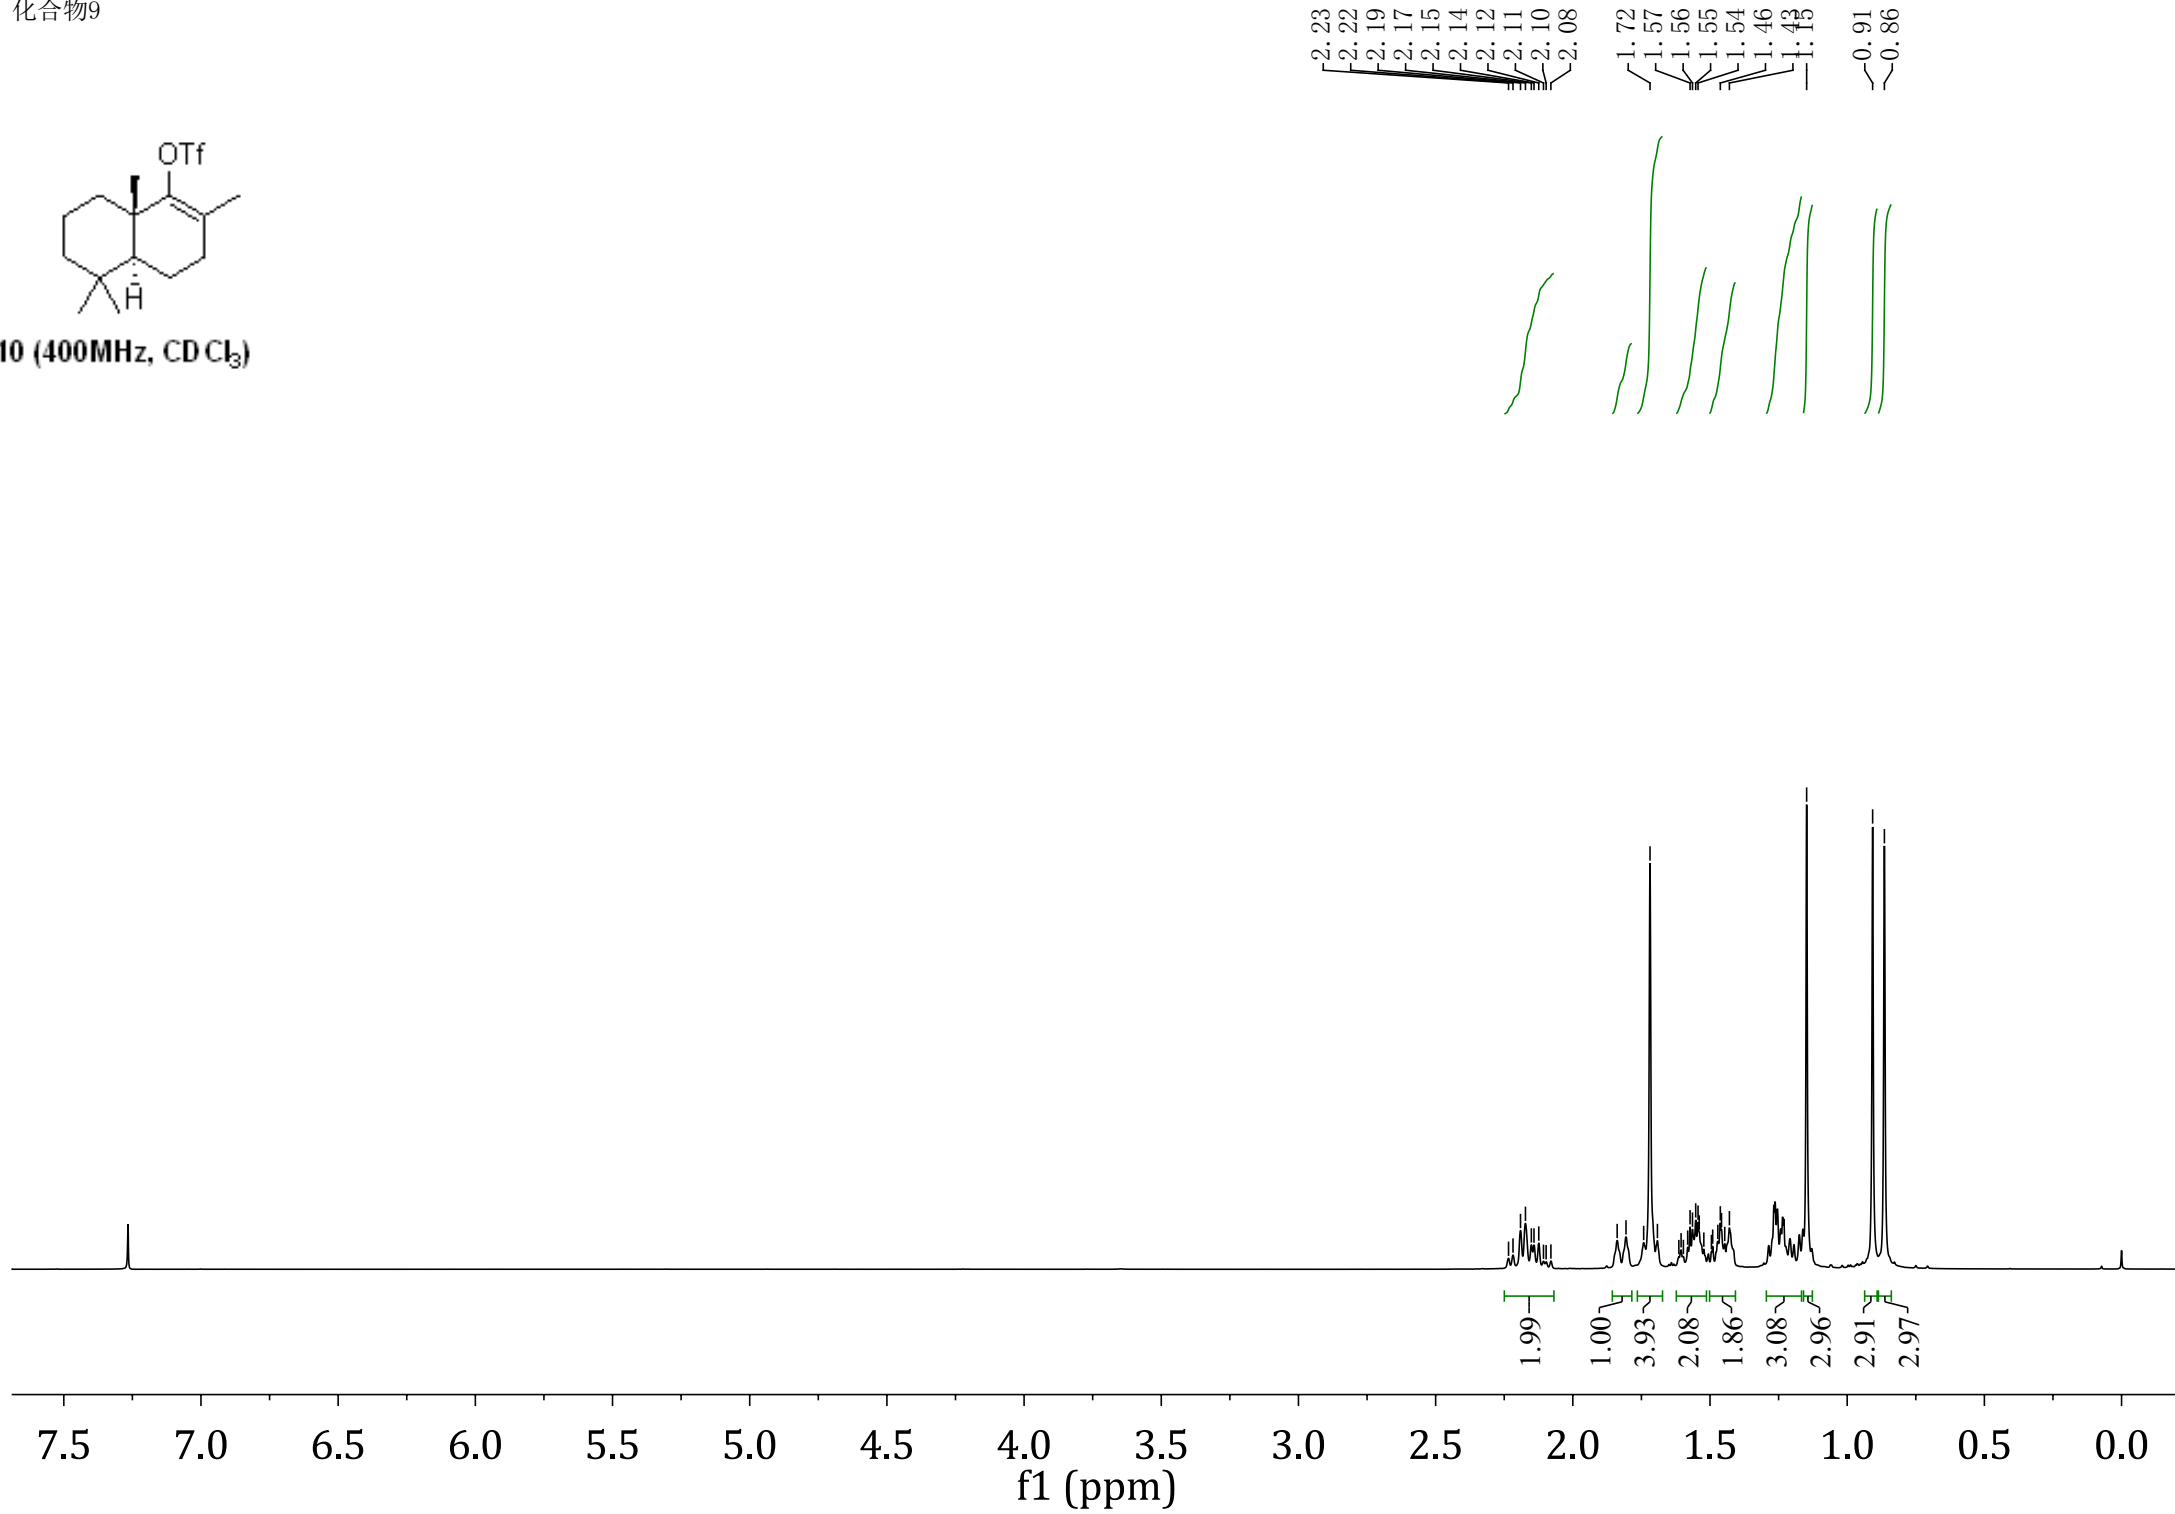

化合物9

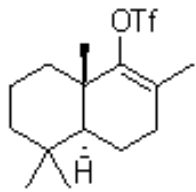

10 (101MHz, CDCl<sub>3</sub>)

—152.00

—124.14

—117.10

—52.54

—41.16

—39.46

—34.72

—33.15

—33.07

—31.86

—21.39

—18.76

—18.26

—18.17

—17.46

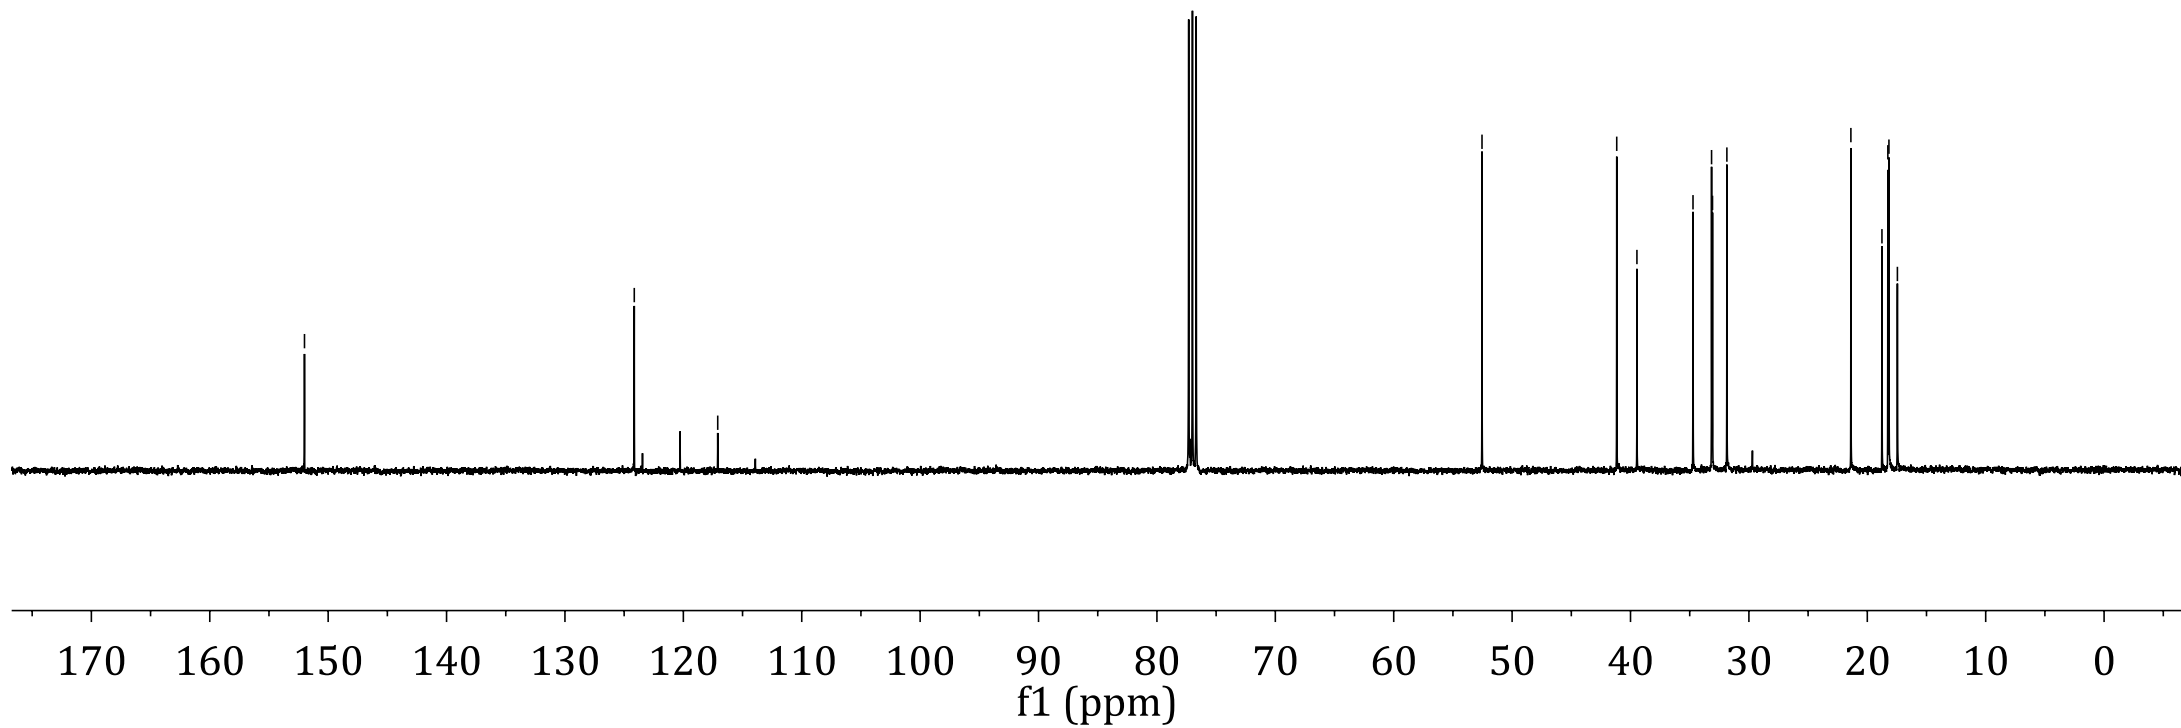

化合物1

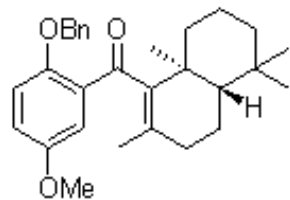

14 (400MHz, CDCl<sub>3</sub>)

7.38  
7.36  
7.33  
7.33  
7.33  
7.31  
7.31  
7.30  
7.27  
7.26  
7.23  
7.23  
6.93  
6.92  
6.91  
6.90  
6.88  
6.85

4.97  
4.97

3.73

1.82  
1.80  
1.78  
1.76  
1.76  
1.74  
1.51  
1.50  
1.48  
1.40  
1.39  
1.36  
1.33  
1.29  
1.28  
1.25  
1.24  
1.23  
1.22  
1.21  
1.20  
1.20  
1.18  
1.10  
1.06  
1.05  
1.03  
1.02  
1.00  
0.99  
0.74  
0.73

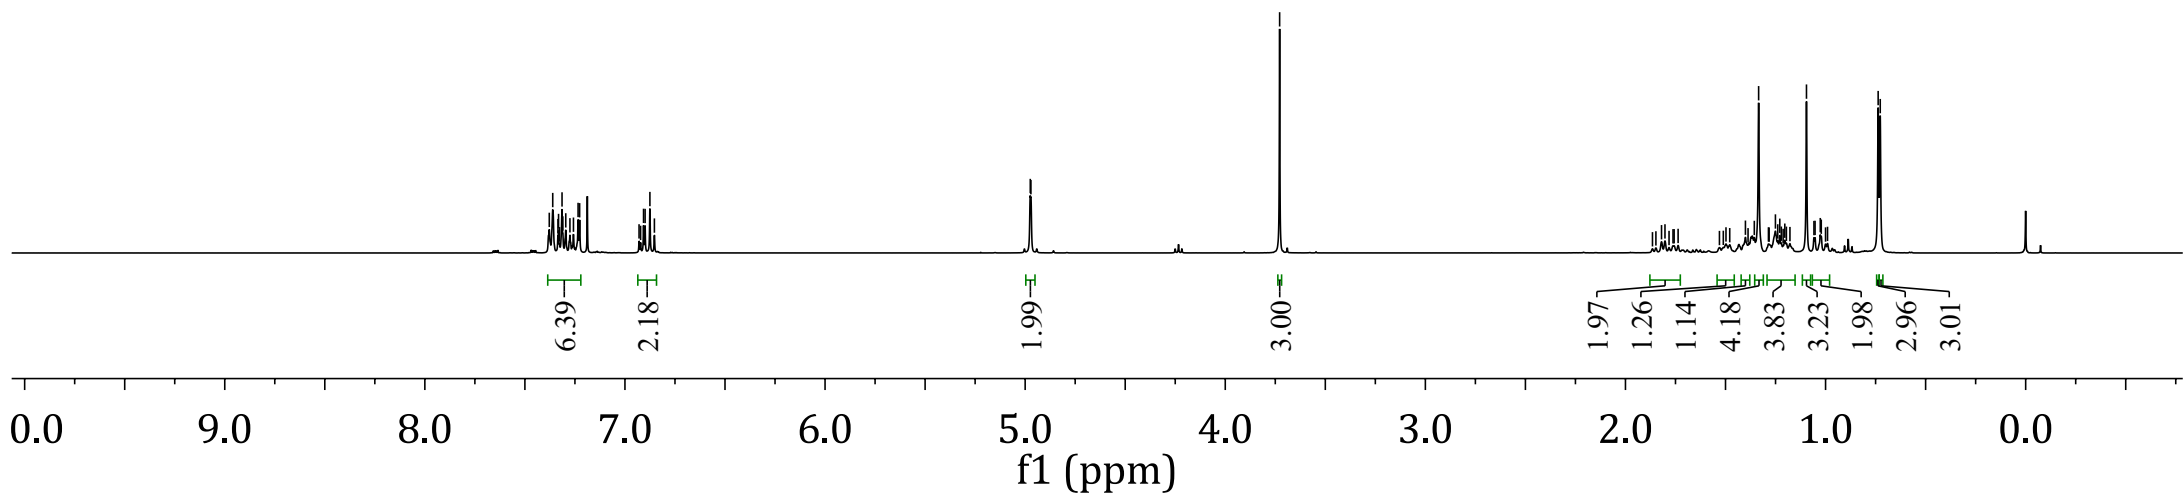

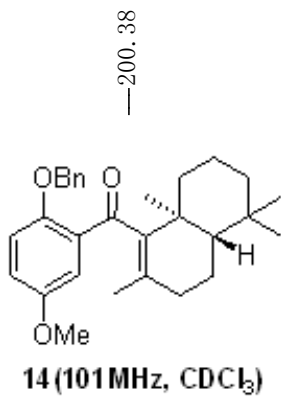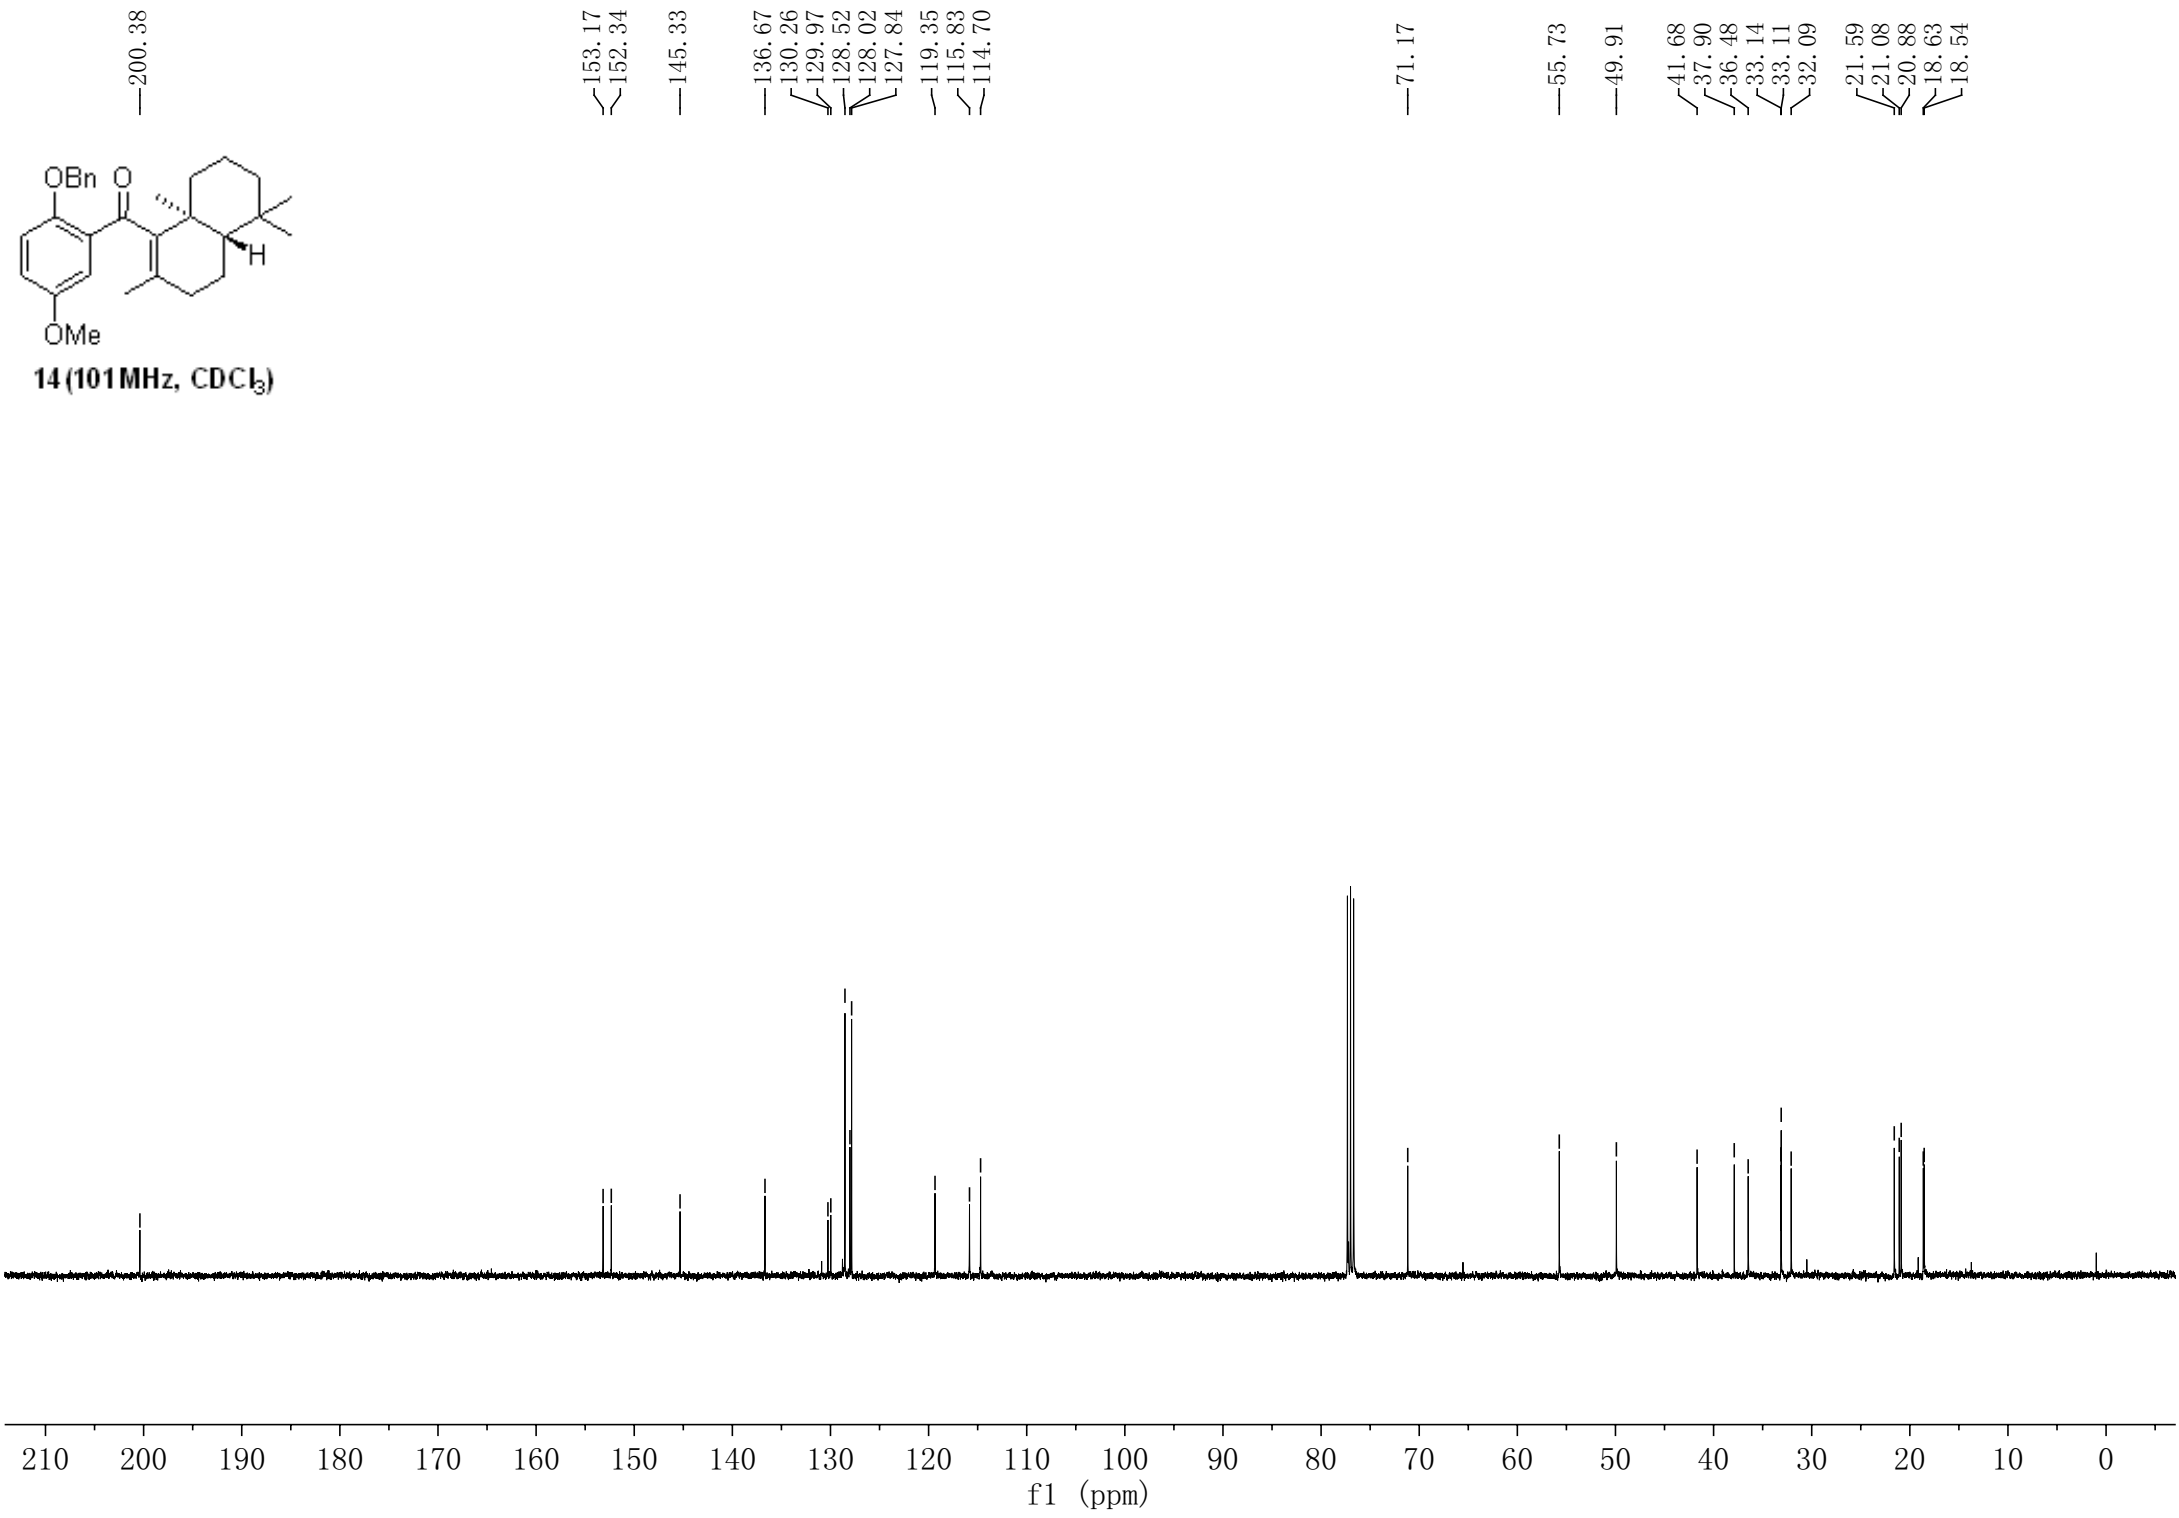

化合物2

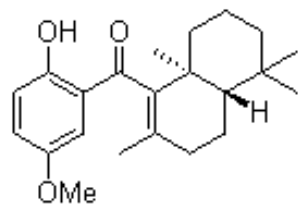

8 (400 MHz, CDCl<sub>3</sub>)

12.05

7.10  
7.09  
7.08  
7.08  
6.94  
6.93  
6.91

3.77

2.21  
2.19  
2.18  
2.17  
1.79  
1.78  
1.65  
1.62  
1.60  
1.58  
1.57  
1.54  
1.45  
1.40  
1.36  
1.34  
1.33  
1.30  
1.19  
1.15  
1.13  
1.12  
0.94  
0.88

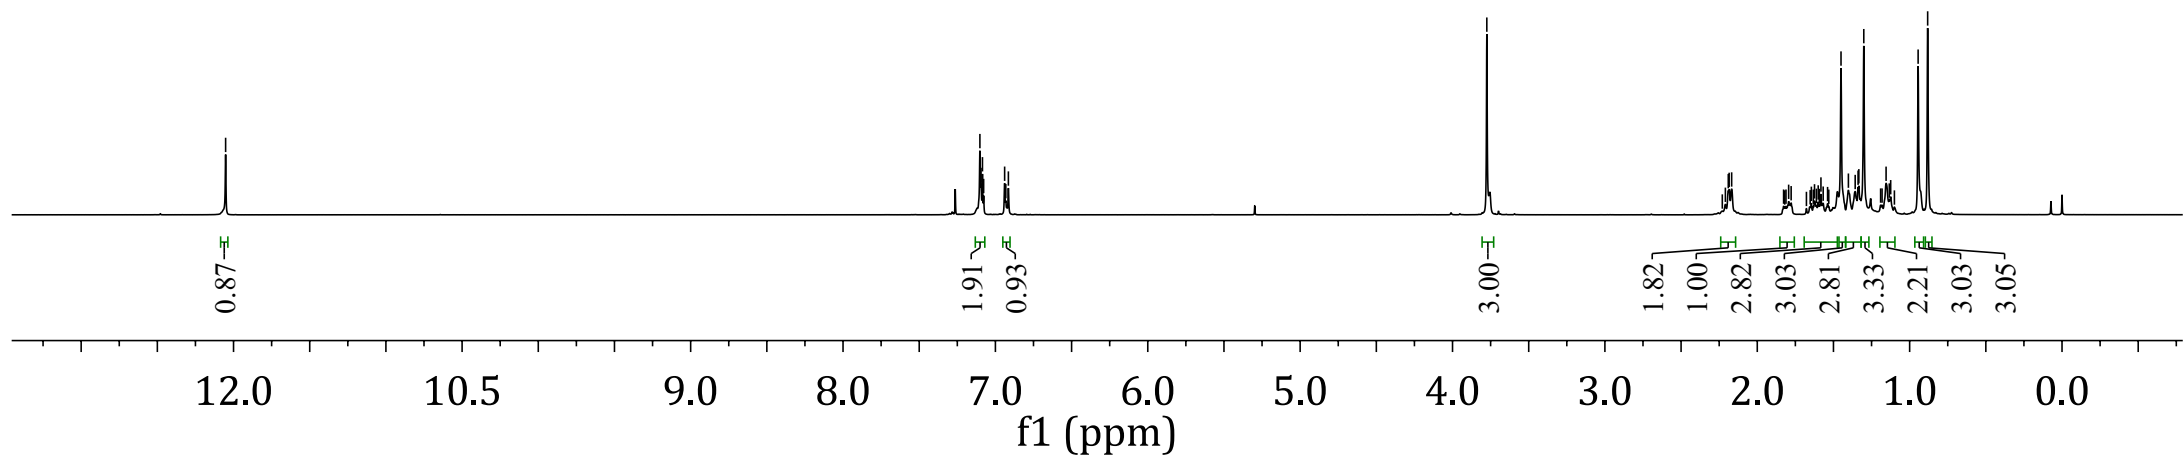



化合物2

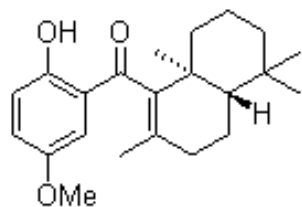

8 (101MHz, CDCl<sub>3</sub>)

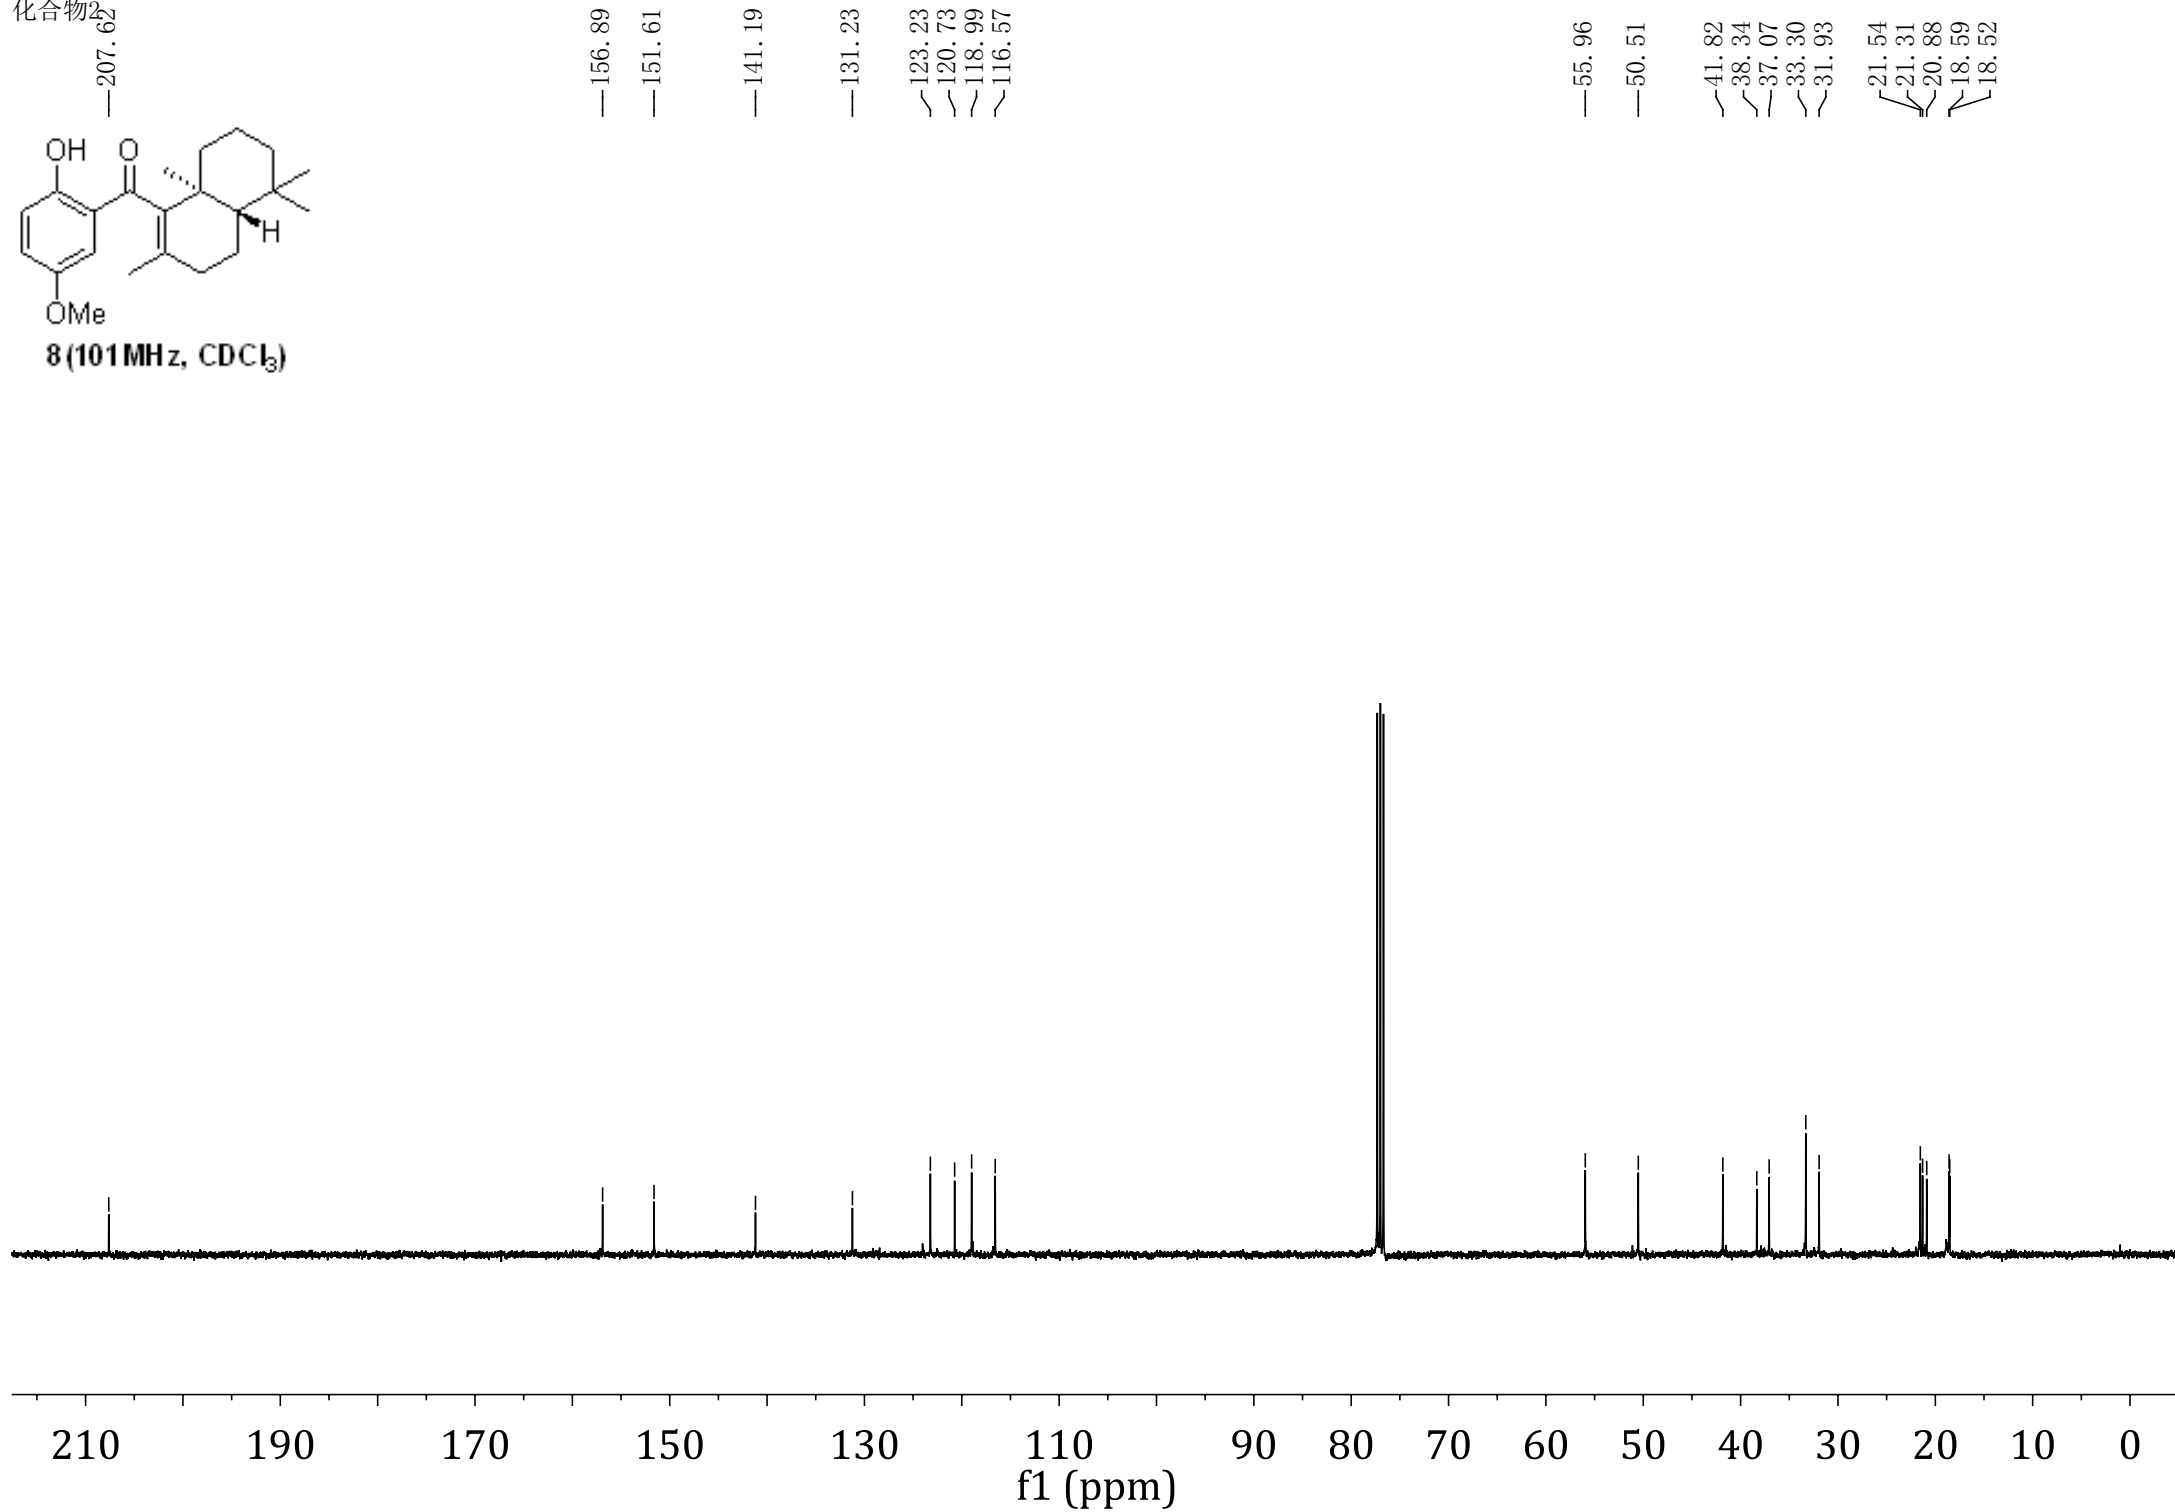

化合物3

7.29  
7.28  
7.07  
7.06  
7.05  
7.04  
6.84  
6.82

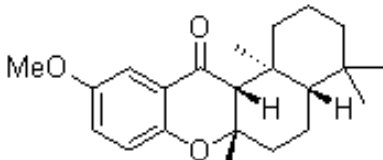

7a(400 MHz, CDCl<sub>3</sub>)

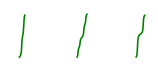

3.80

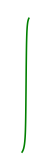

2.26  
2.25  
2.24  
2.22  
2.22  
2.21  
1.94  
1.65  
1.65  
1.44  
1.43  
1.43  
1.40  
1.25  
0.92  
0.90  
0.90  
0.84

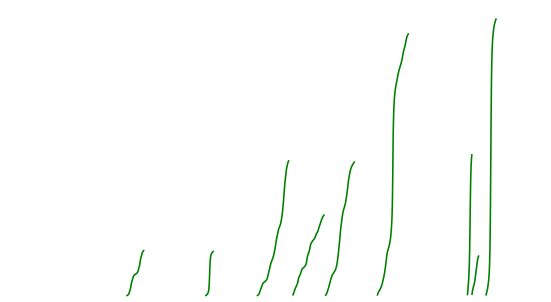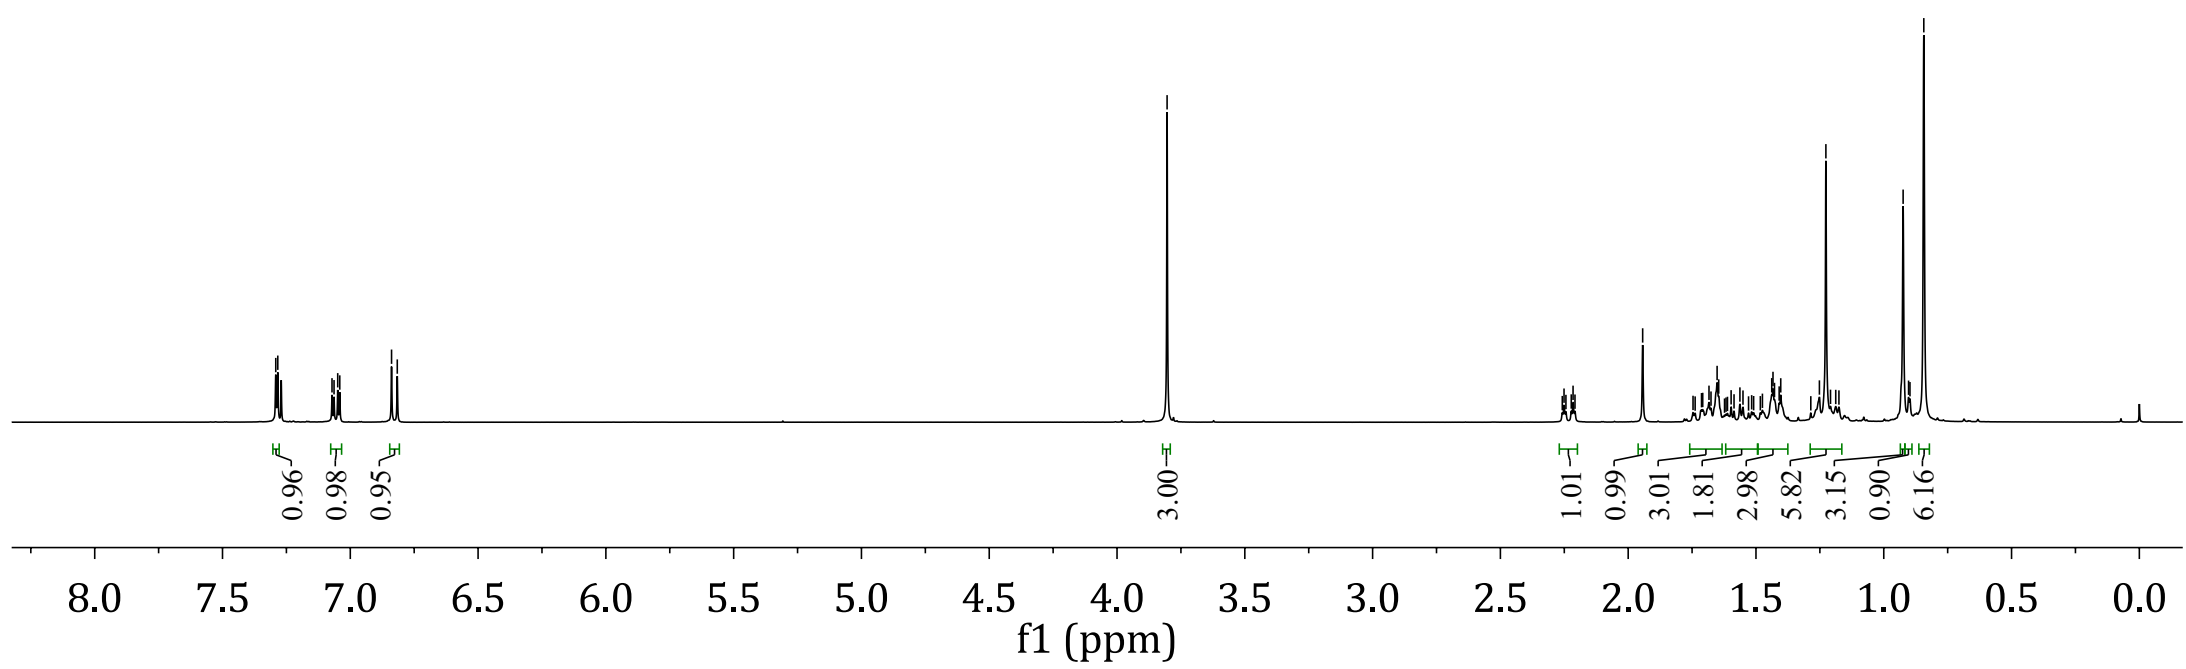

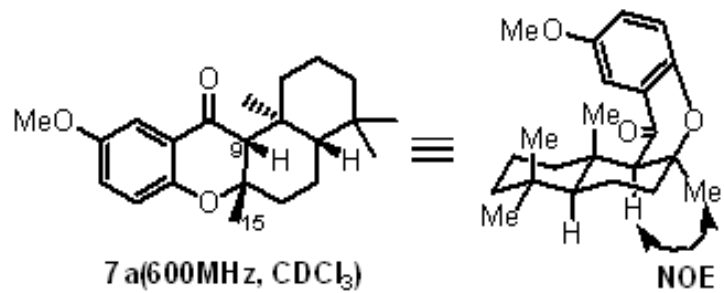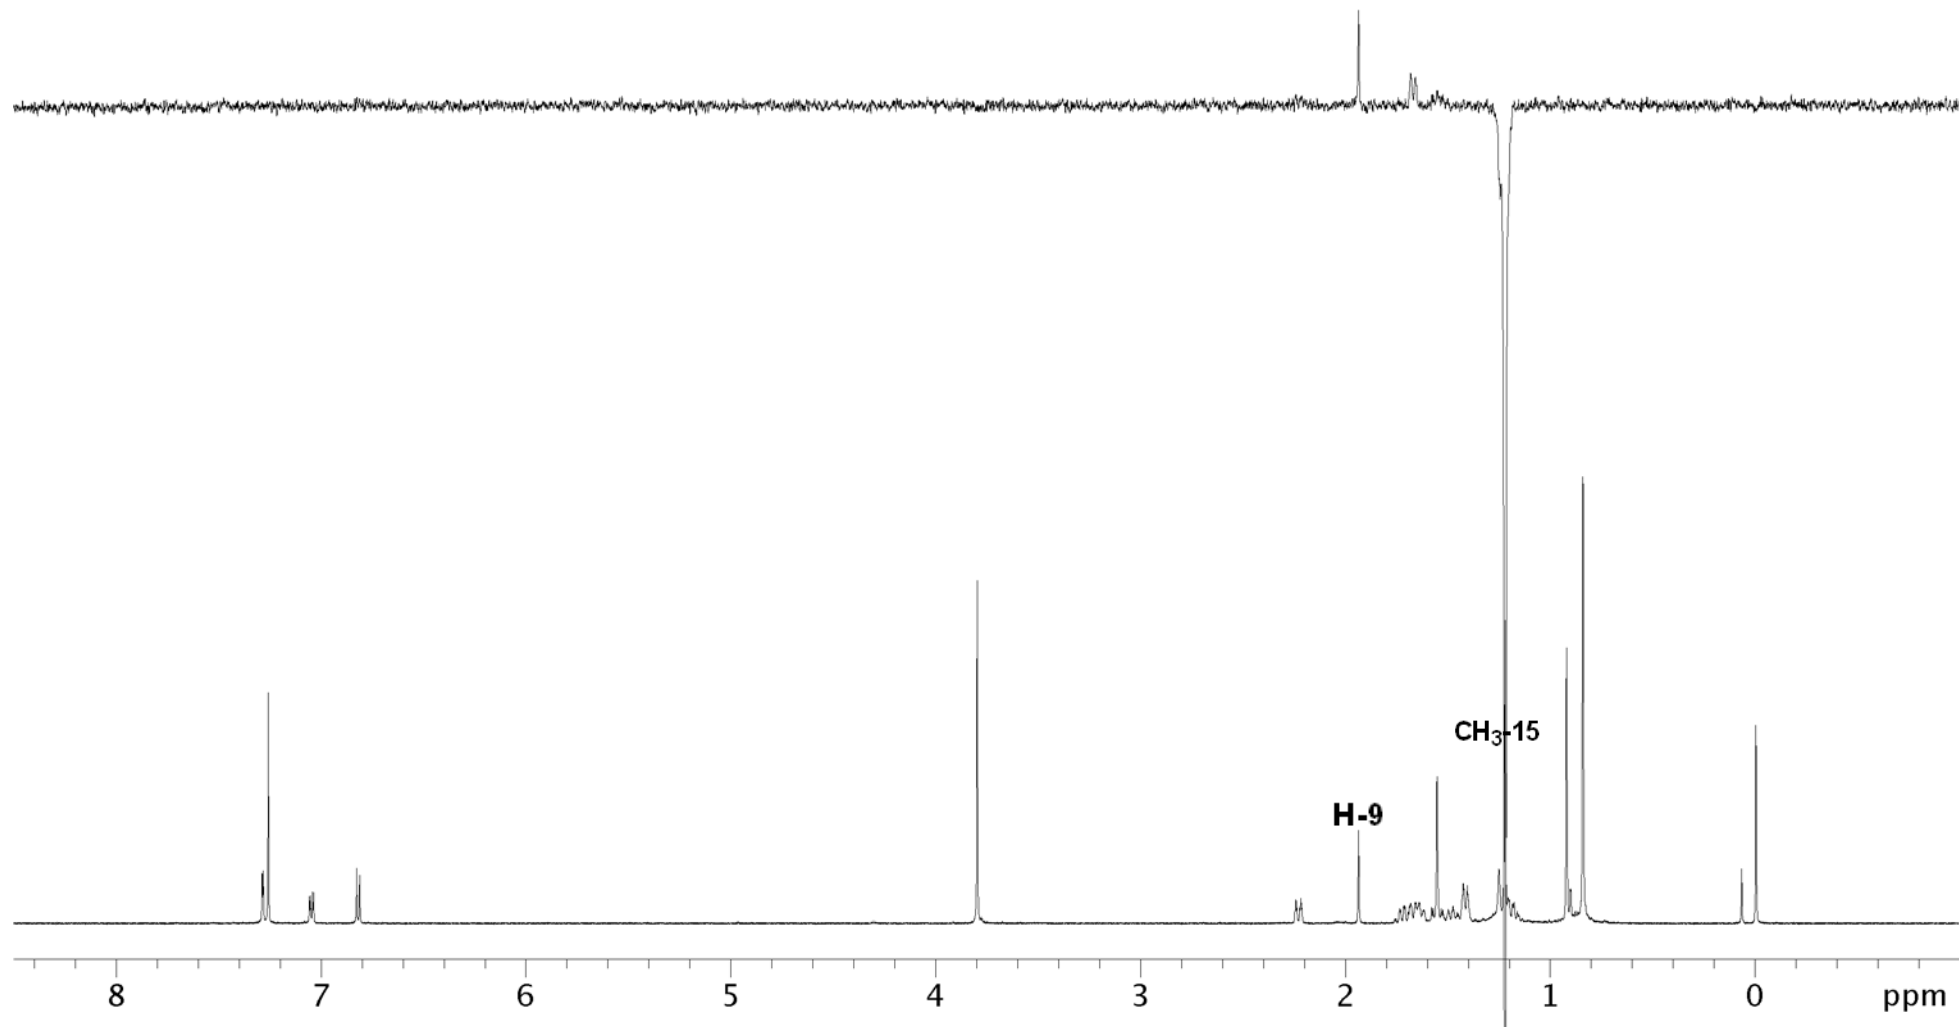

化合物3

—194.91

—154.66  
—153.40

—124.61  
—121.99  
—119.34

—106.66

—79.96

—64.55

—55.69  
—54.26

—41.61  
—40.02  
—39.94  
—38.40  
—33.82  
—33.42  
—26.45  
—22.01  
—18.35  
—18.08  
—15.23

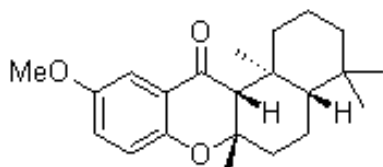

7a(101MHz, CDCl<sub>3</sub>)

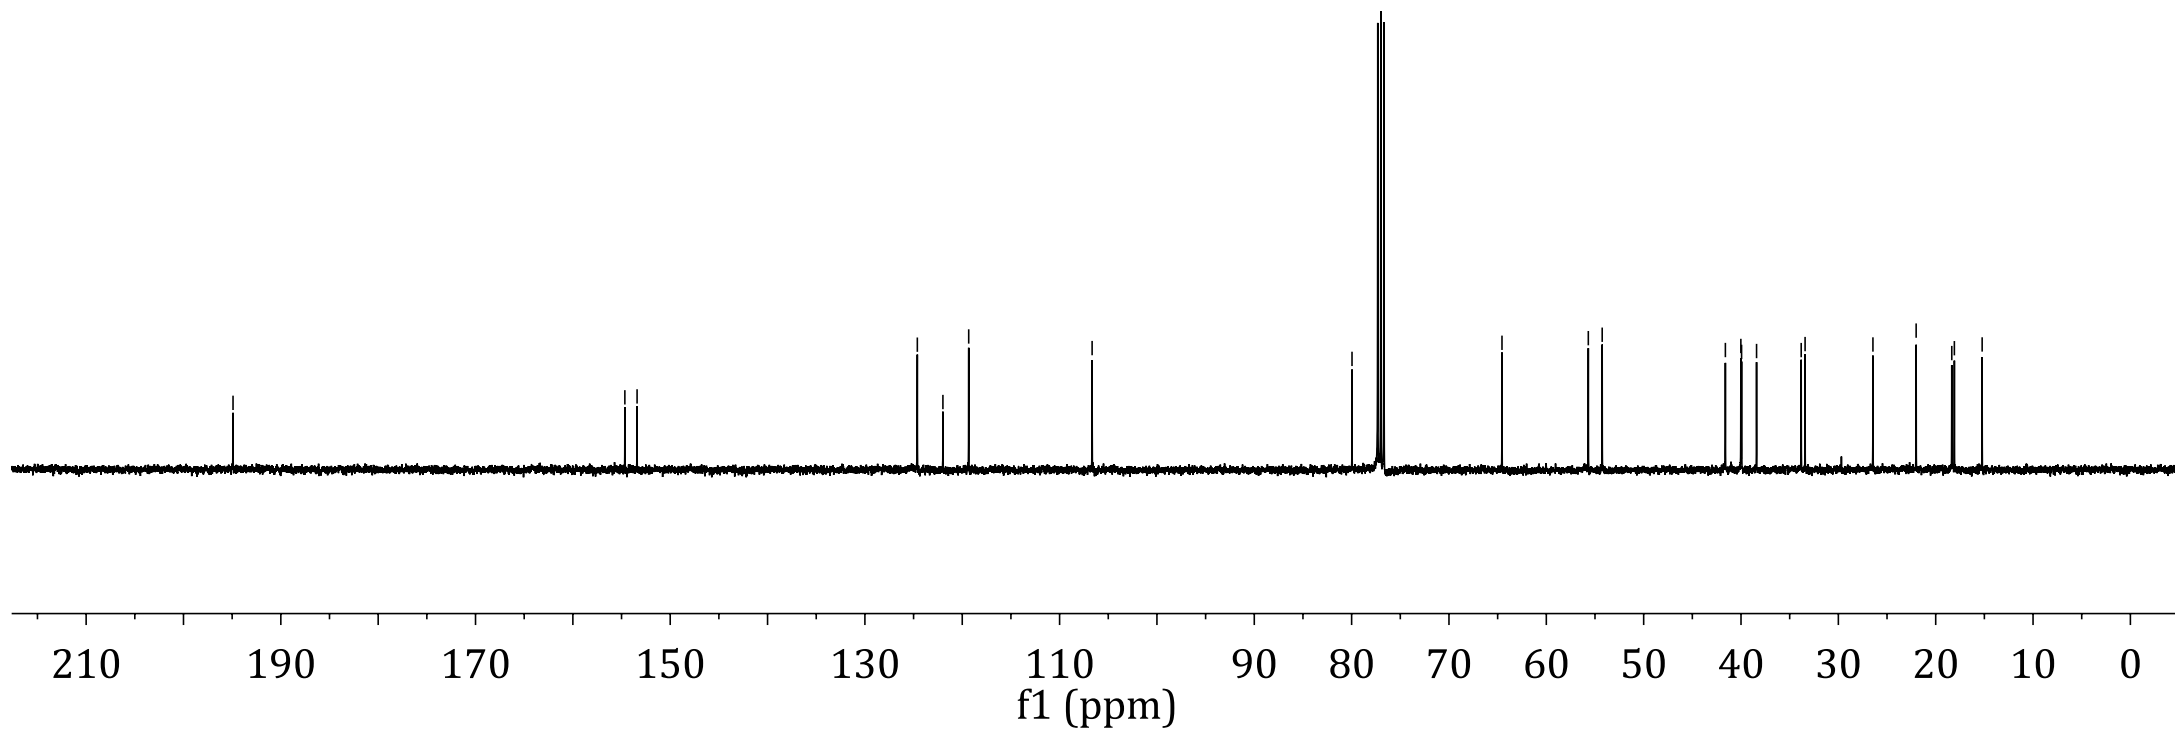

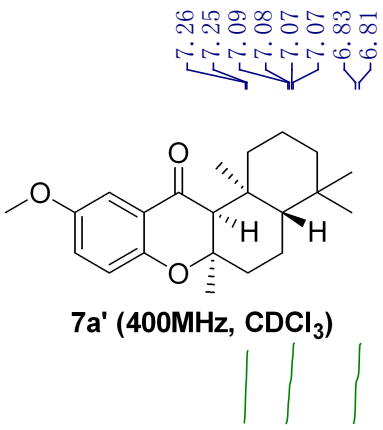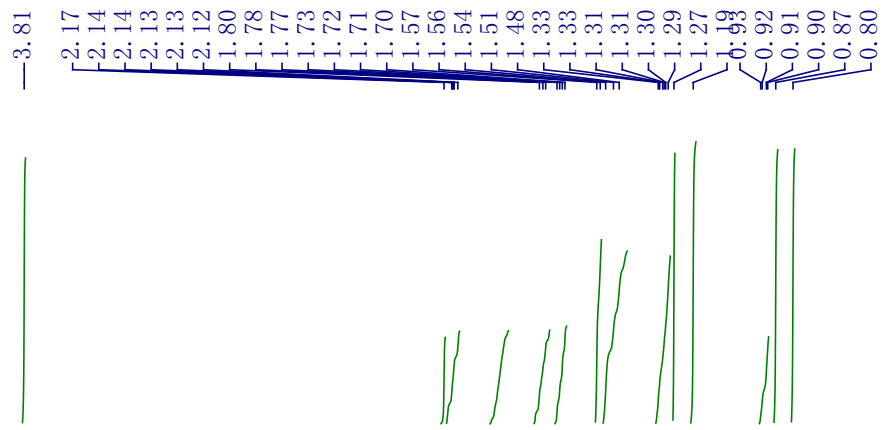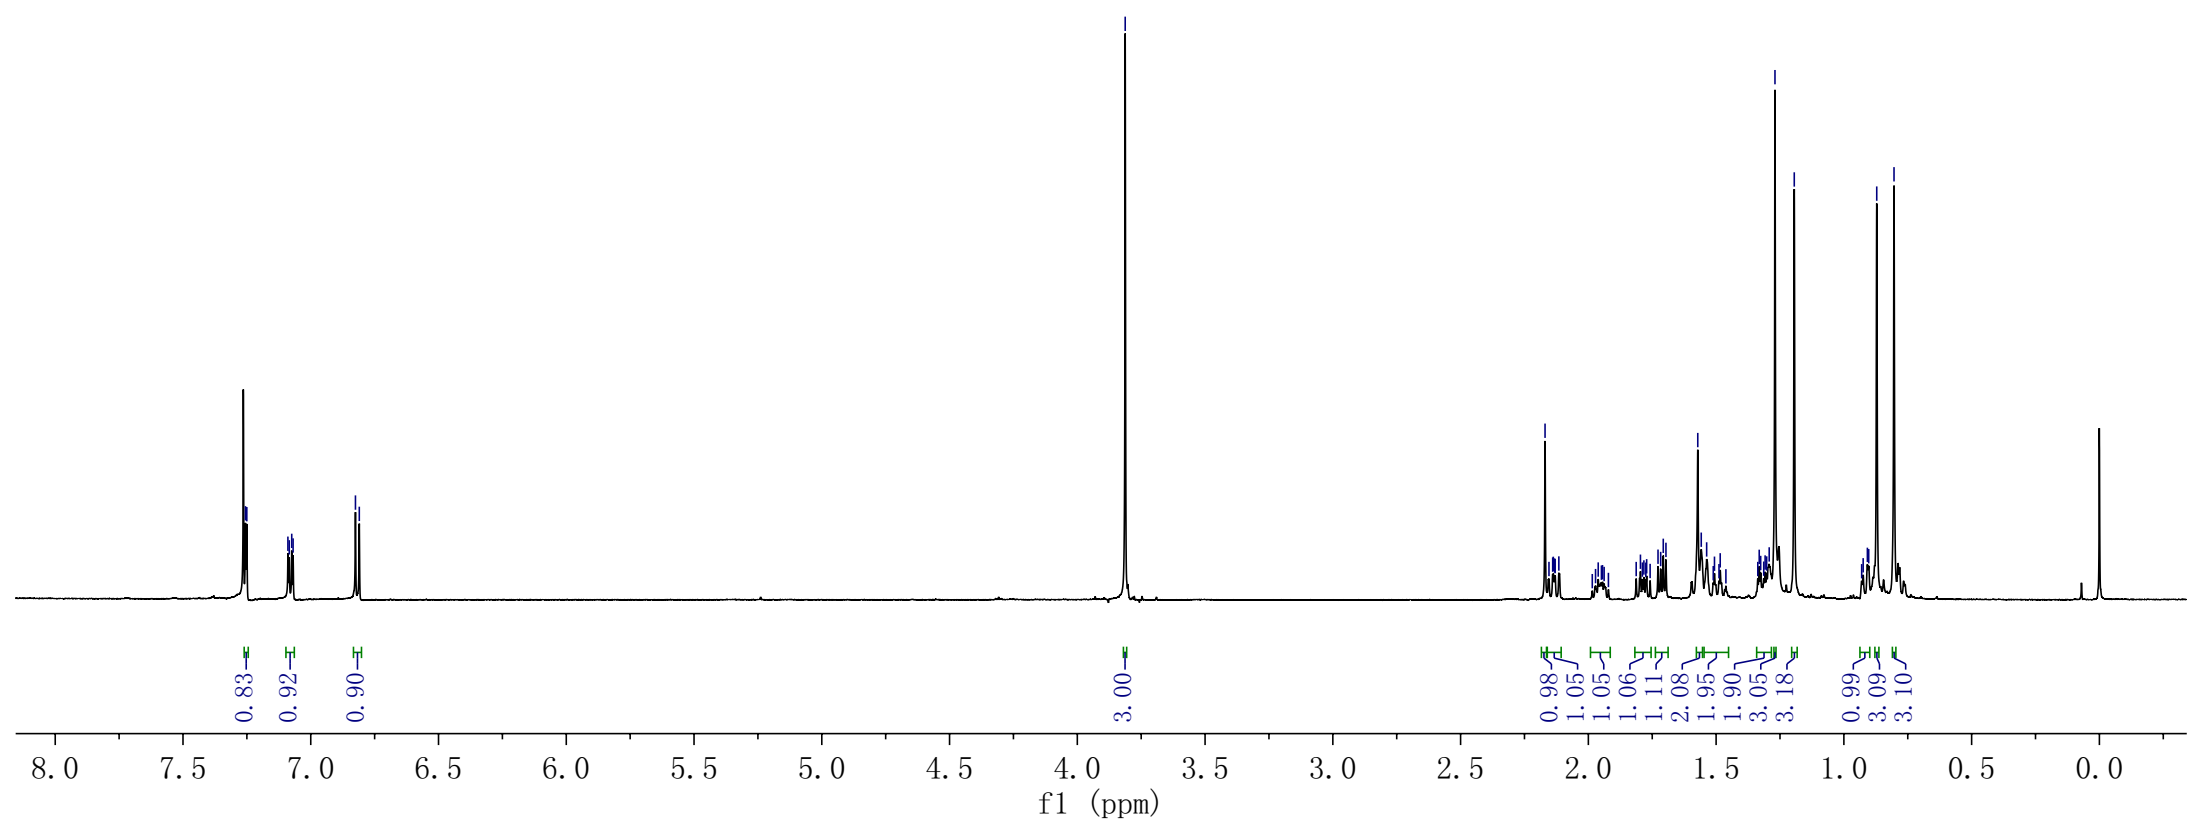

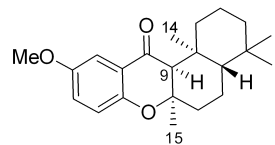

7a' (600MHz, CDCl<sub>3</sub>)

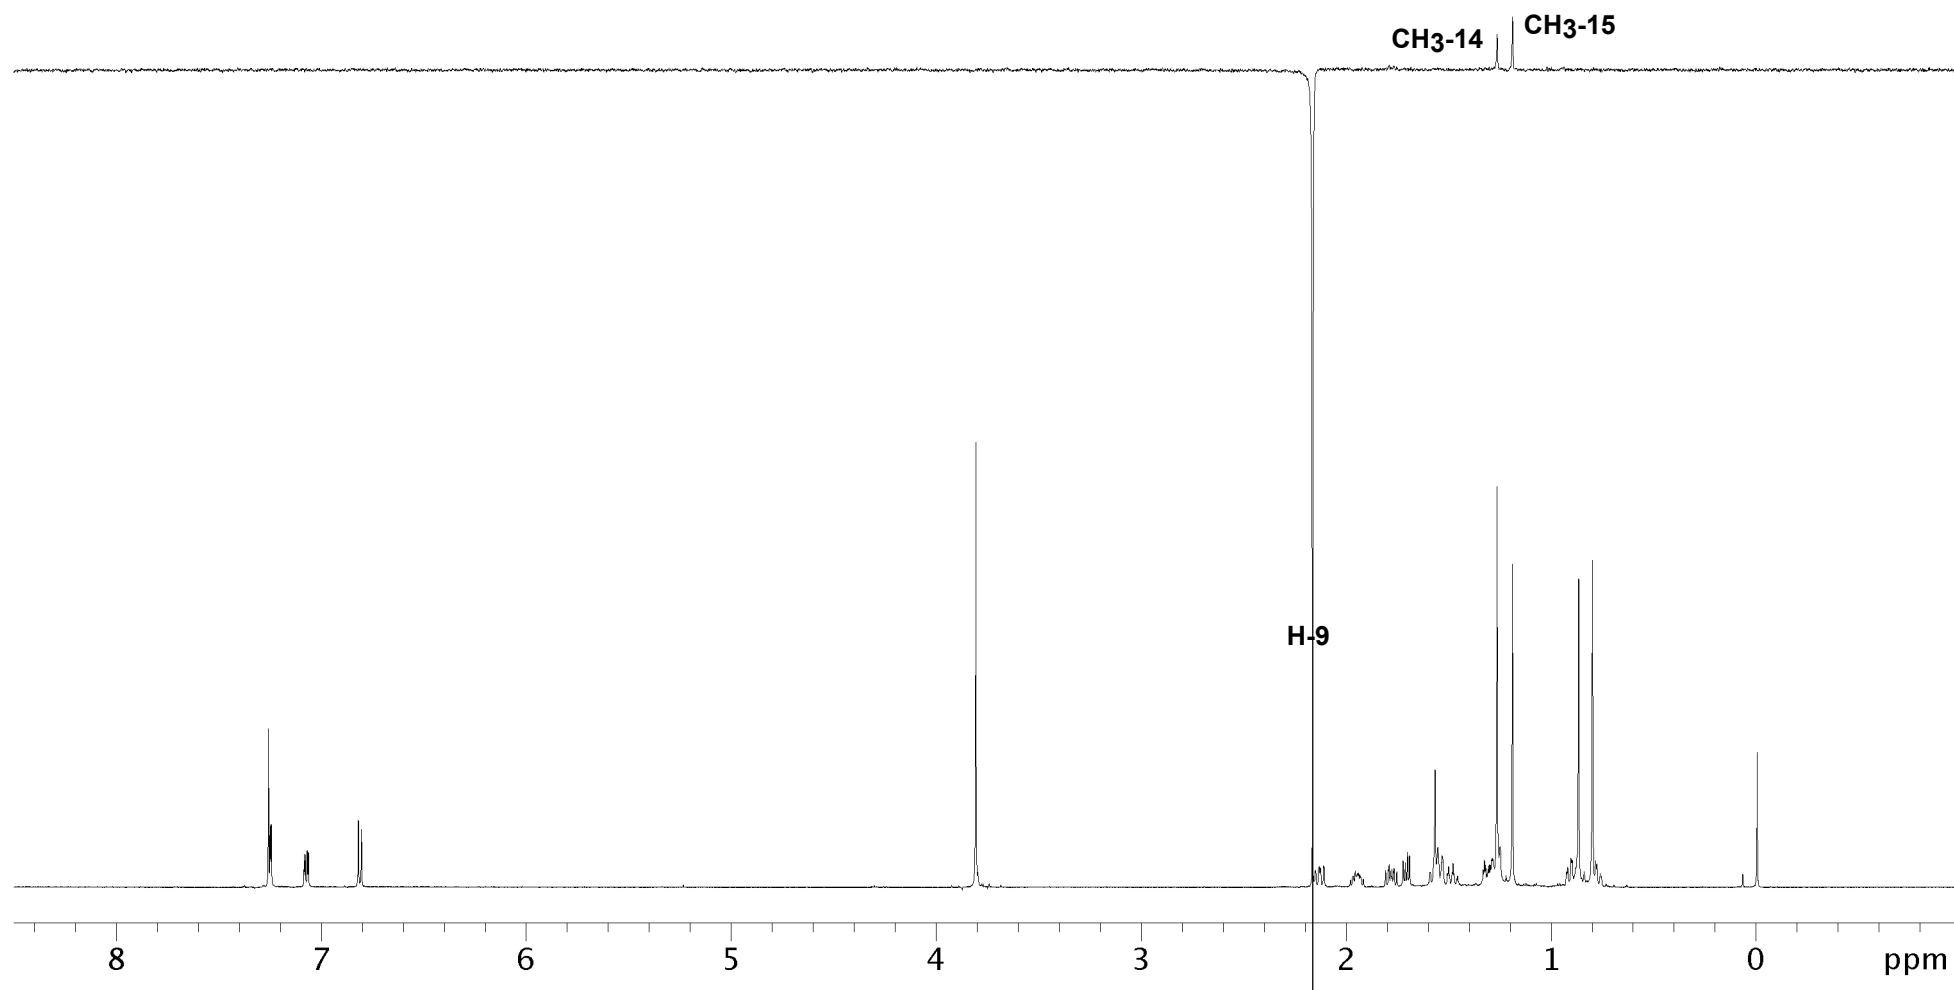

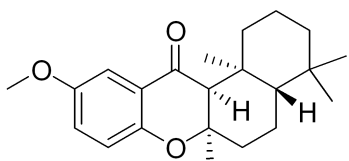

7a' (151 MHz, CDCl<sub>3</sub>)

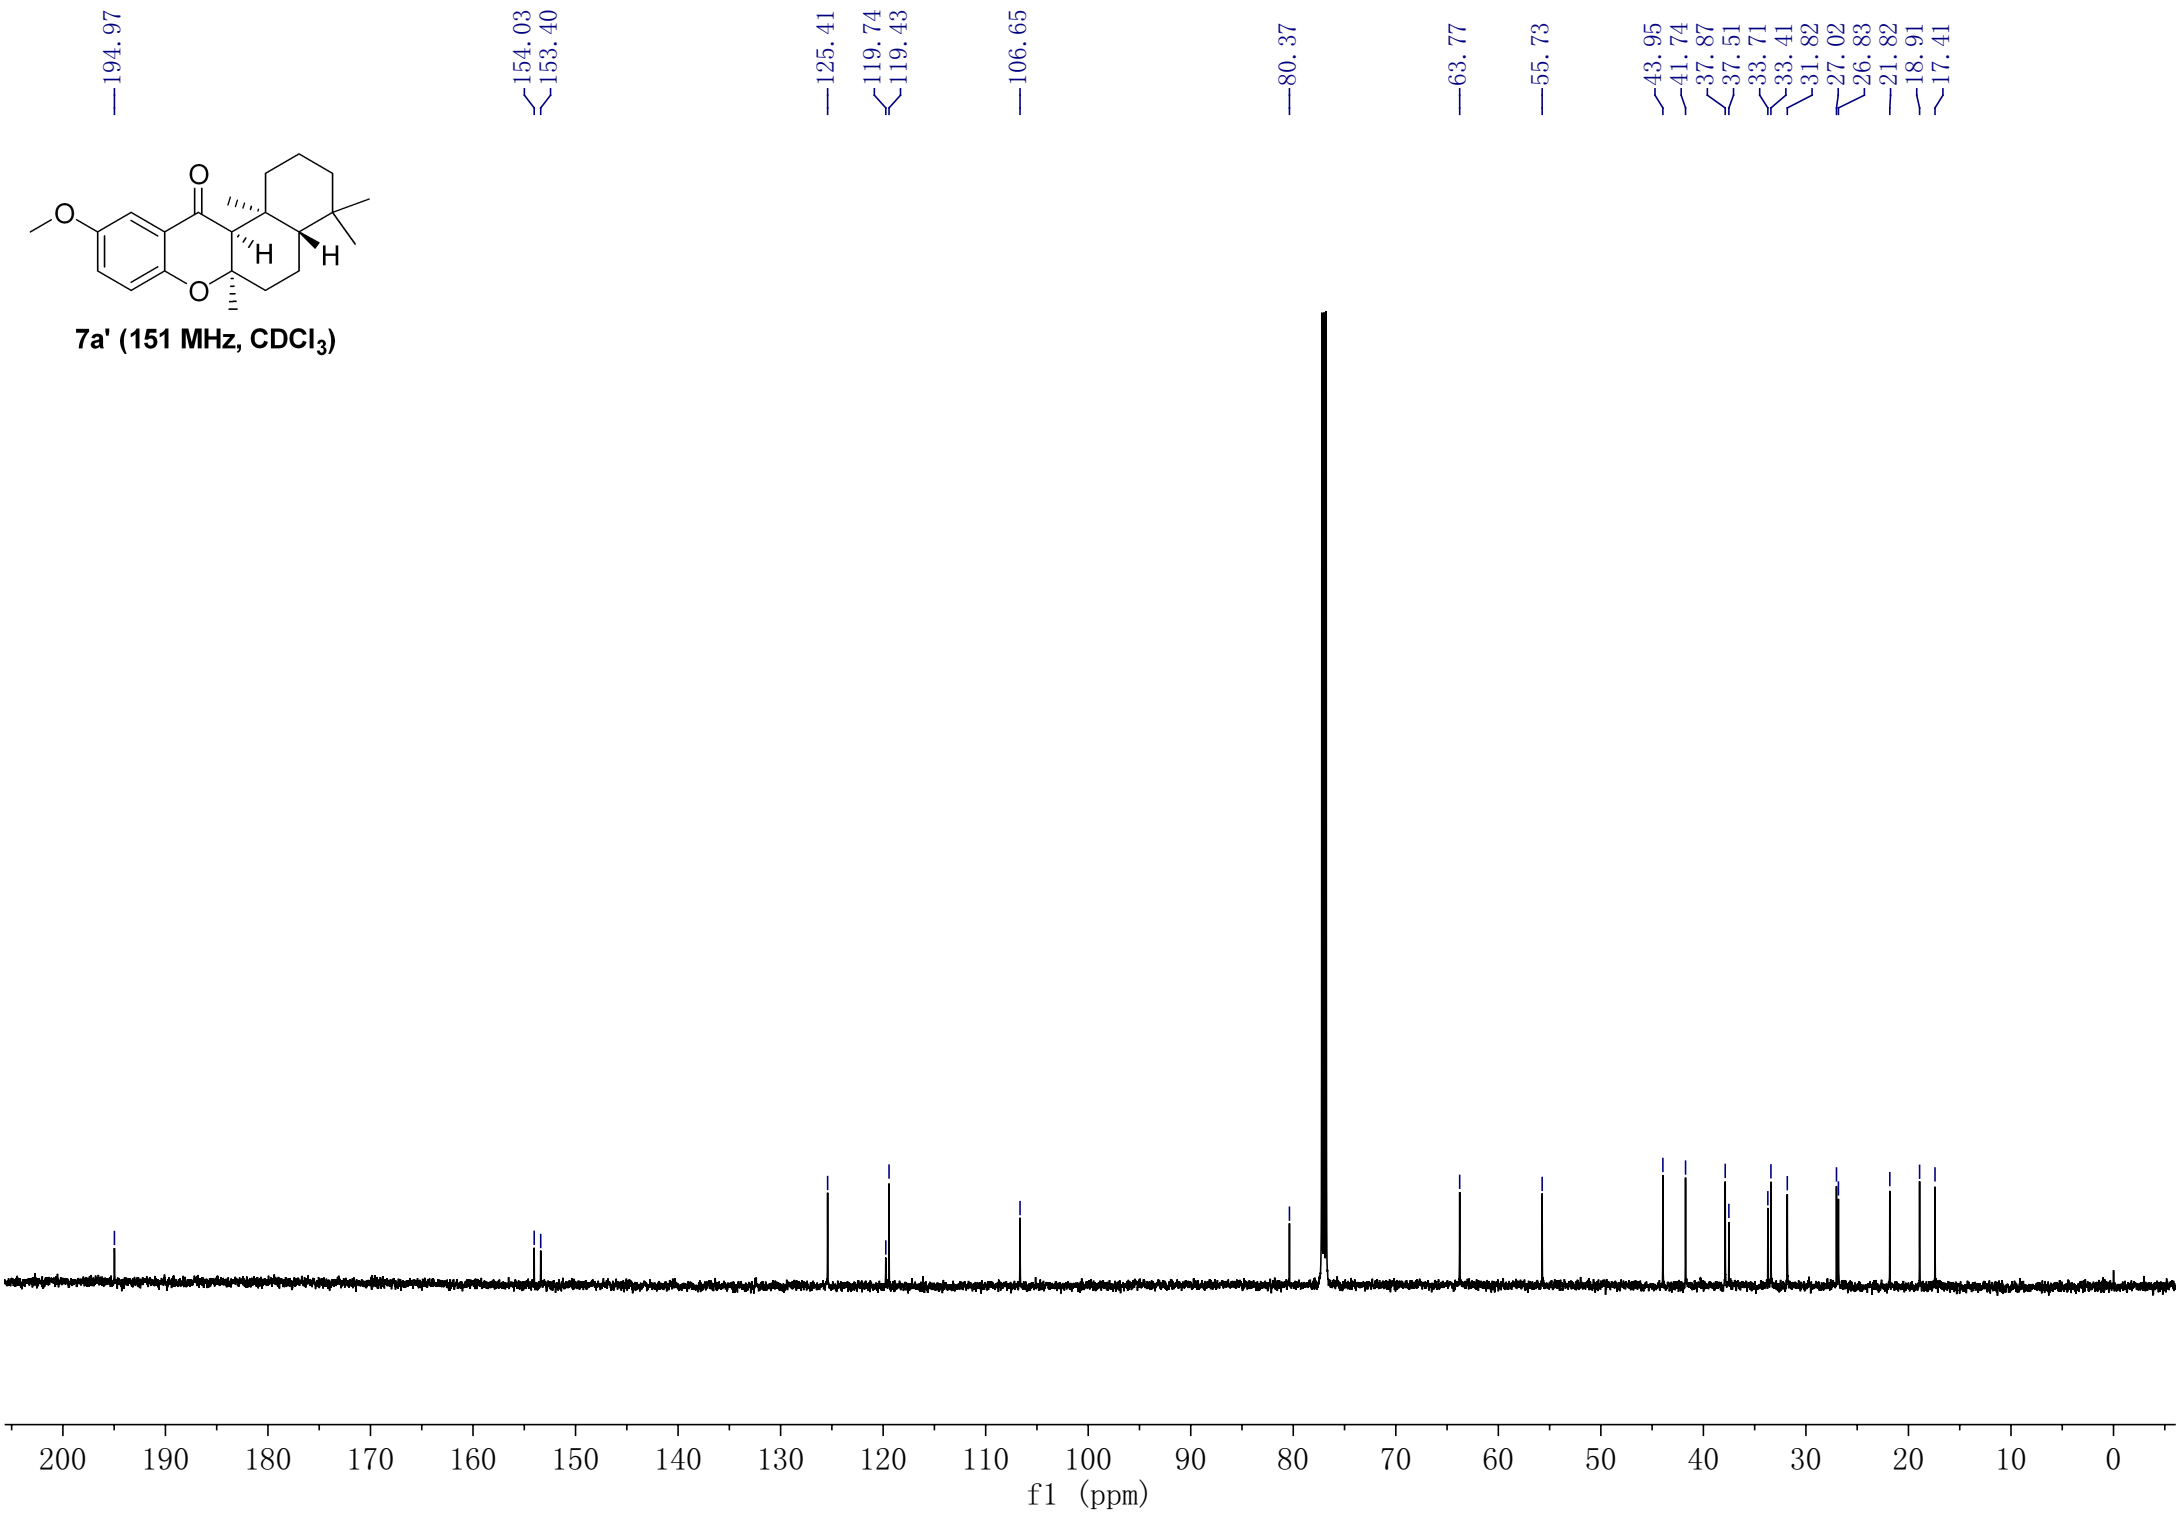

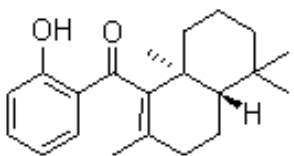

**8b** (400MHz, CDCl<sub>3</sub>)

—12.48

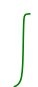

1.04

1.07  
1.06  
1.07  
1.04

2.00  
1.07  
2.26  
3.03  
3.94  
2.98  
2.27  
3.11  
3.03

7.60  
7.60  
7.58  
7.58  
7.46  
7.45  
7.44  
7.42  
7.42  
6.98  
6.96  
6.89  
6.87  
6.85

2.22  
2.19  
2.17  
1.83  
1.81  
1.80  
1.78  
1.65  
1.63  
1.63  
1.62  
1.61  
1.60  
1.60  
1.57  
1.53  
1.53  
1.42  
1.40  
1.39  
1.36  
1.35  
1.33  
1.33  
1.31  
1.20  
1.19  
1.16  
1.16  
1.13  
1.12  
1.11  
1.10  
0.95  
0.88

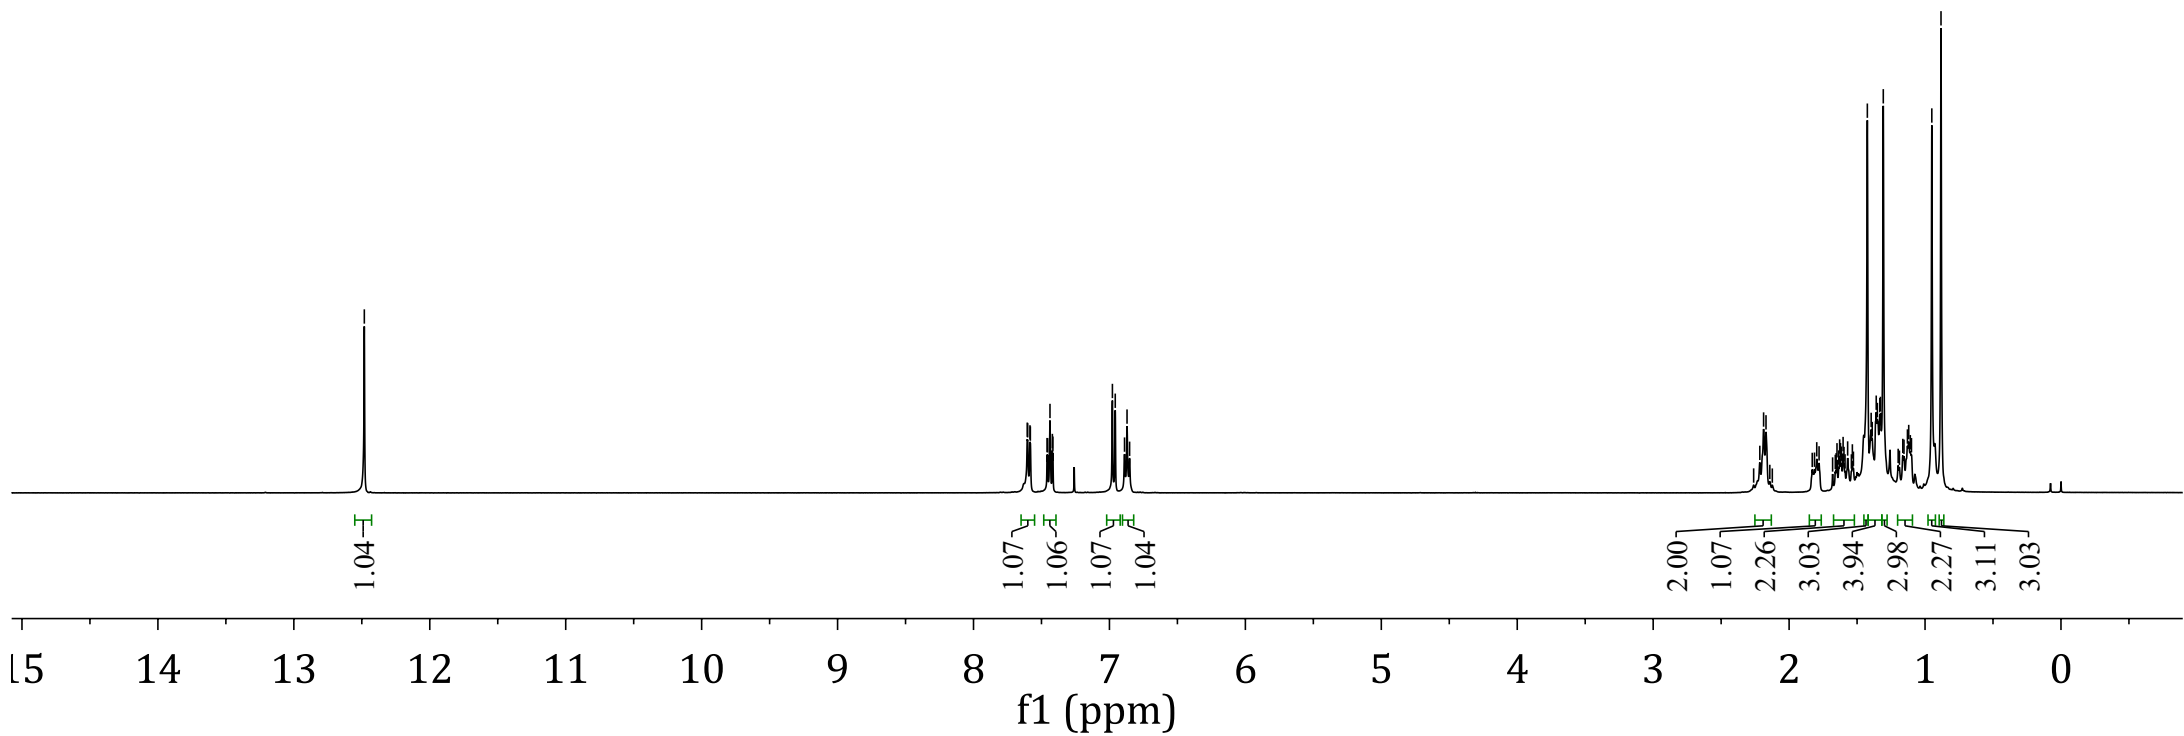



SP-180621-3

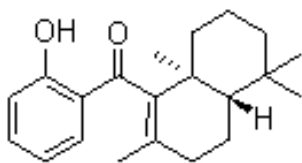

**8b** (101MHz, CDCl<sub>3</sub>)

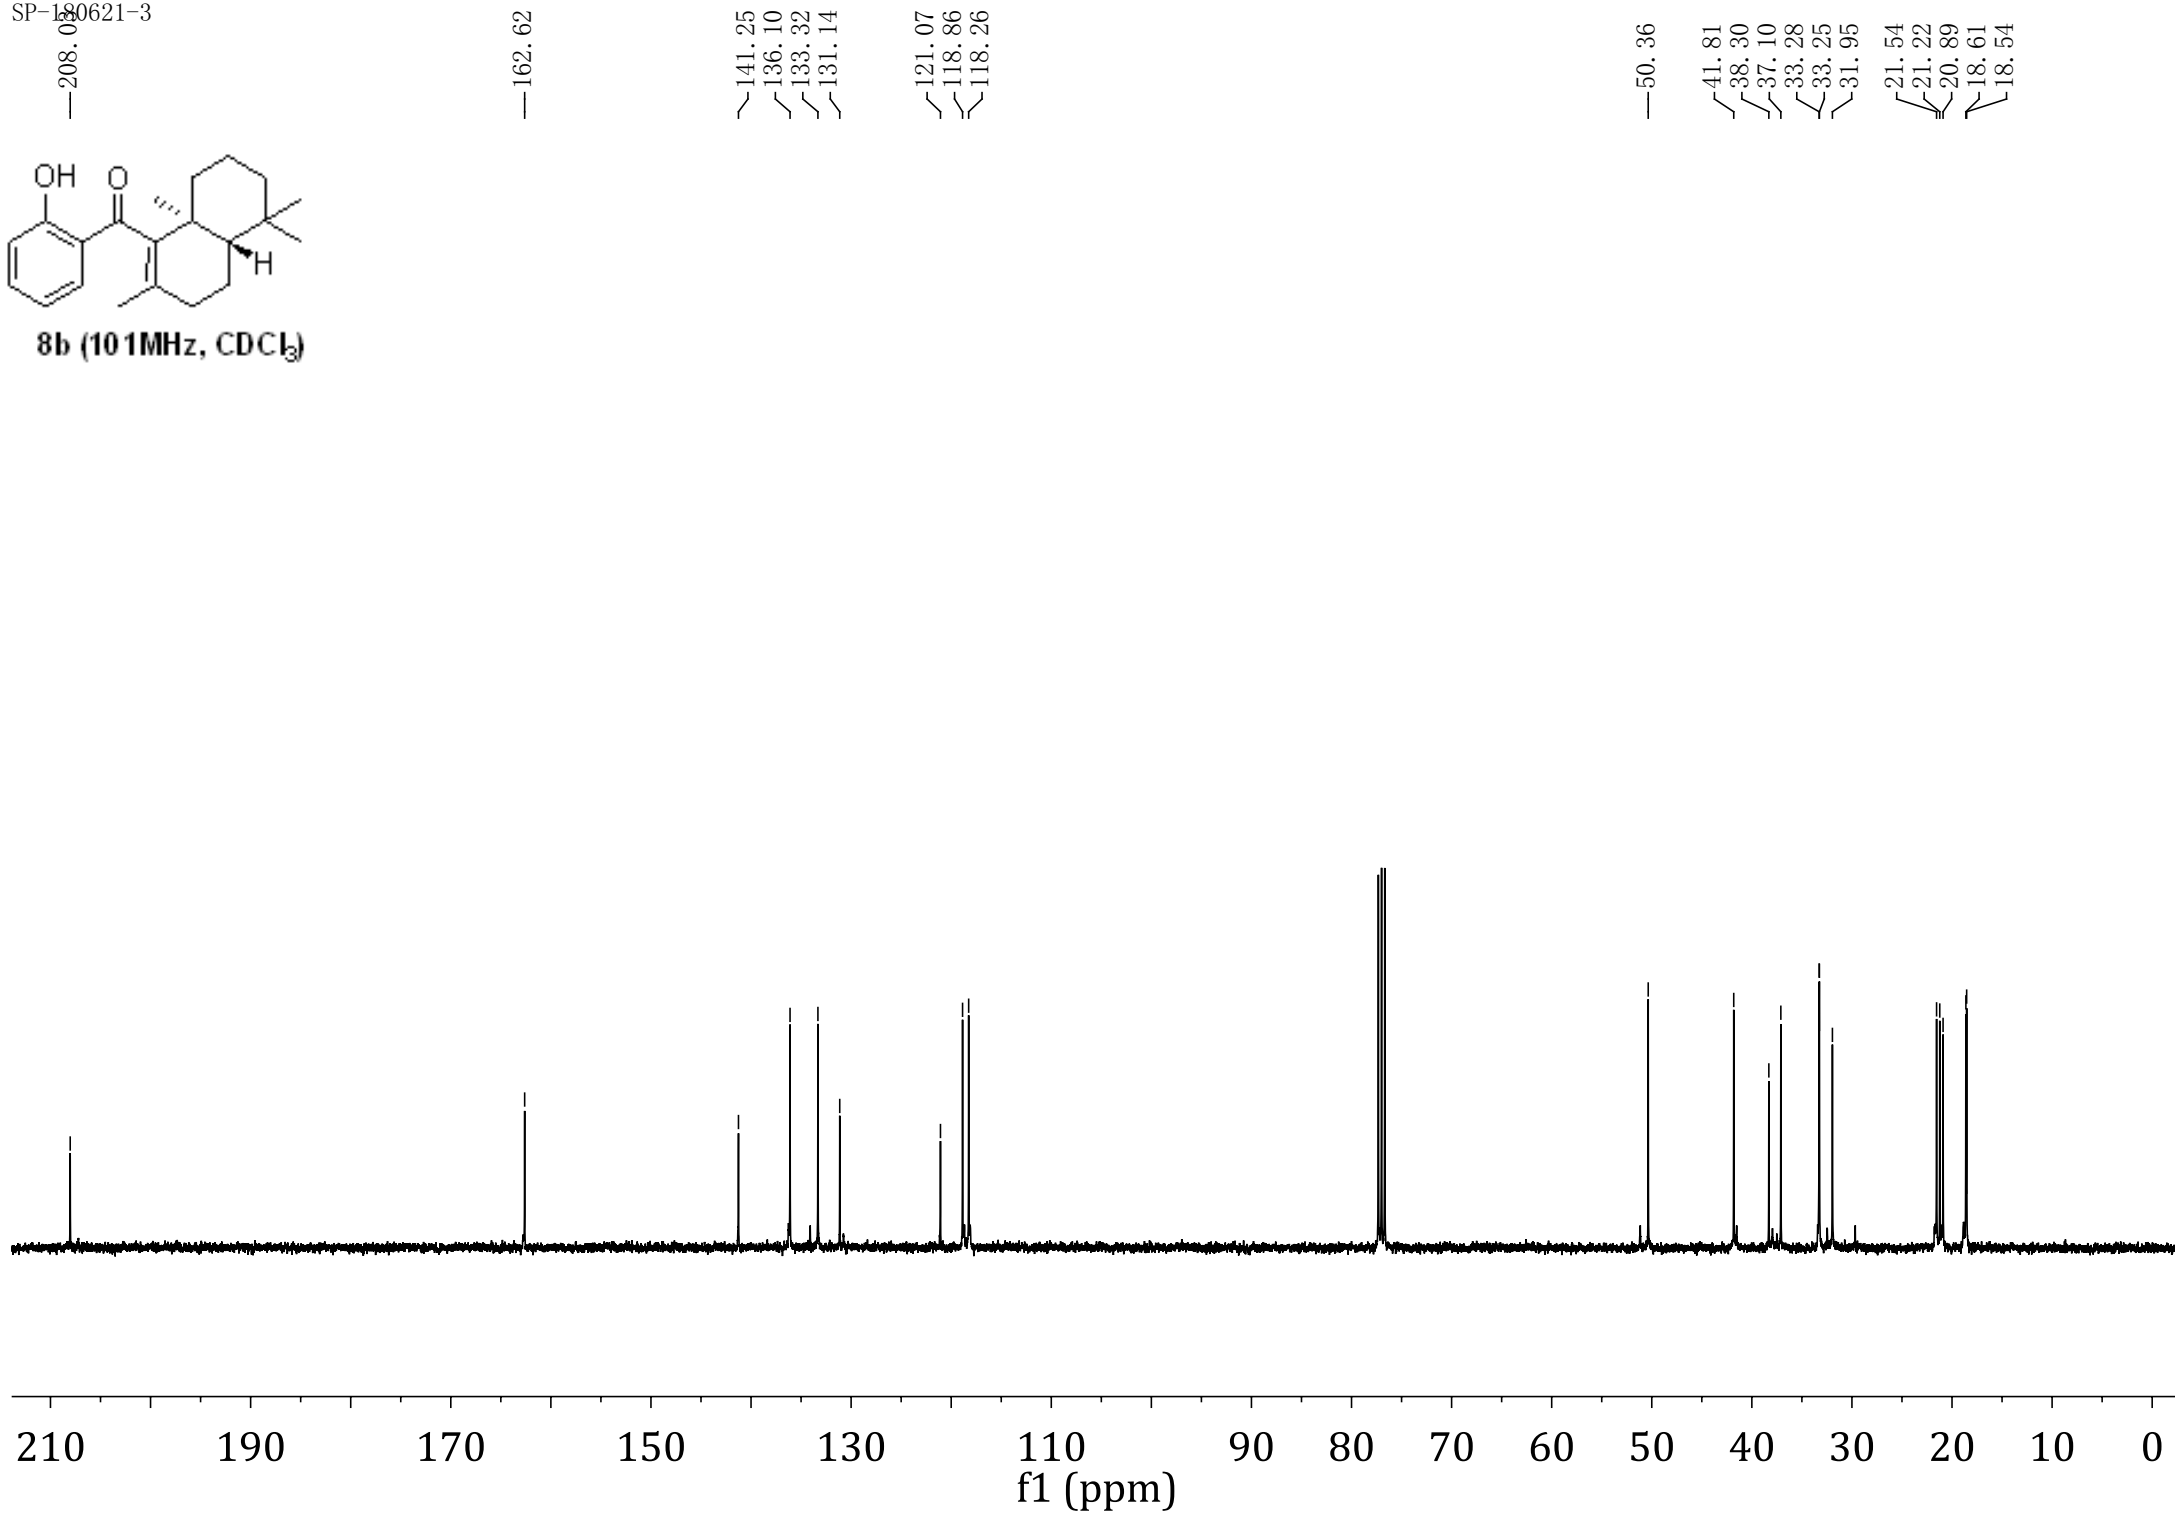

sp-0612-2-H  
STANDARD 1H OBSERVE

7.86  
7.85  
7.83  
7.83

7.43  
7.43  
7.42  
6.97

6.95  
6.94  
6.92  
6.92  
6.90  
6.90  
6.87  
6.87

2.29  
2.29  
2.28  
2.25  
2.24  
2.23

1.97  
1.67  
1.66  
1.66  
1.65

1.61  
1.57  
1.45  
1.44  
1.43  
1.42

1.41  
1.40  
1.24  
0.95  
0.94  
0.93  
0.91  
0.90  
0.85  
0.84

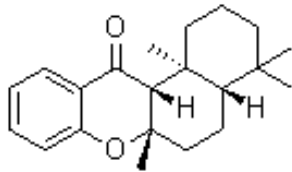

7b (300MHz, CDCl<sub>3</sub>)

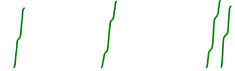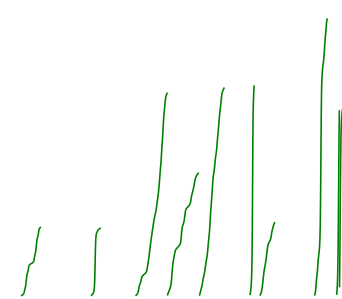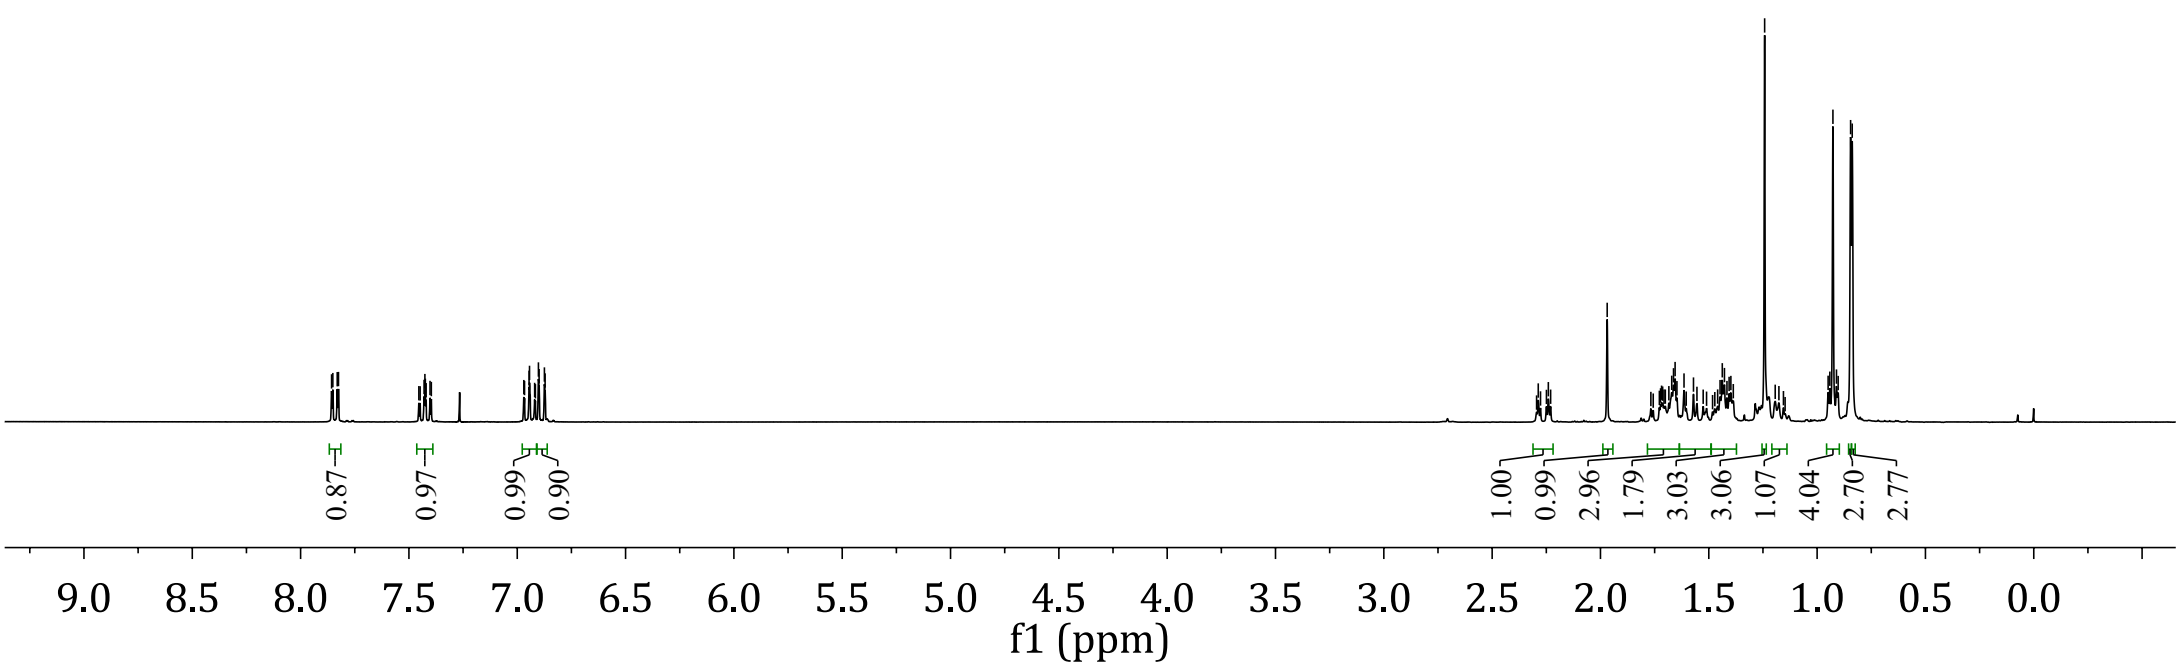

sp-0612-2-C  
13C OBSERVE

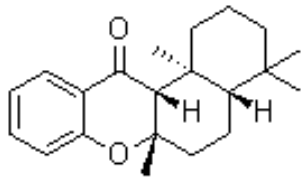

**7b** (75MHz, CDCl<sub>3</sub>)

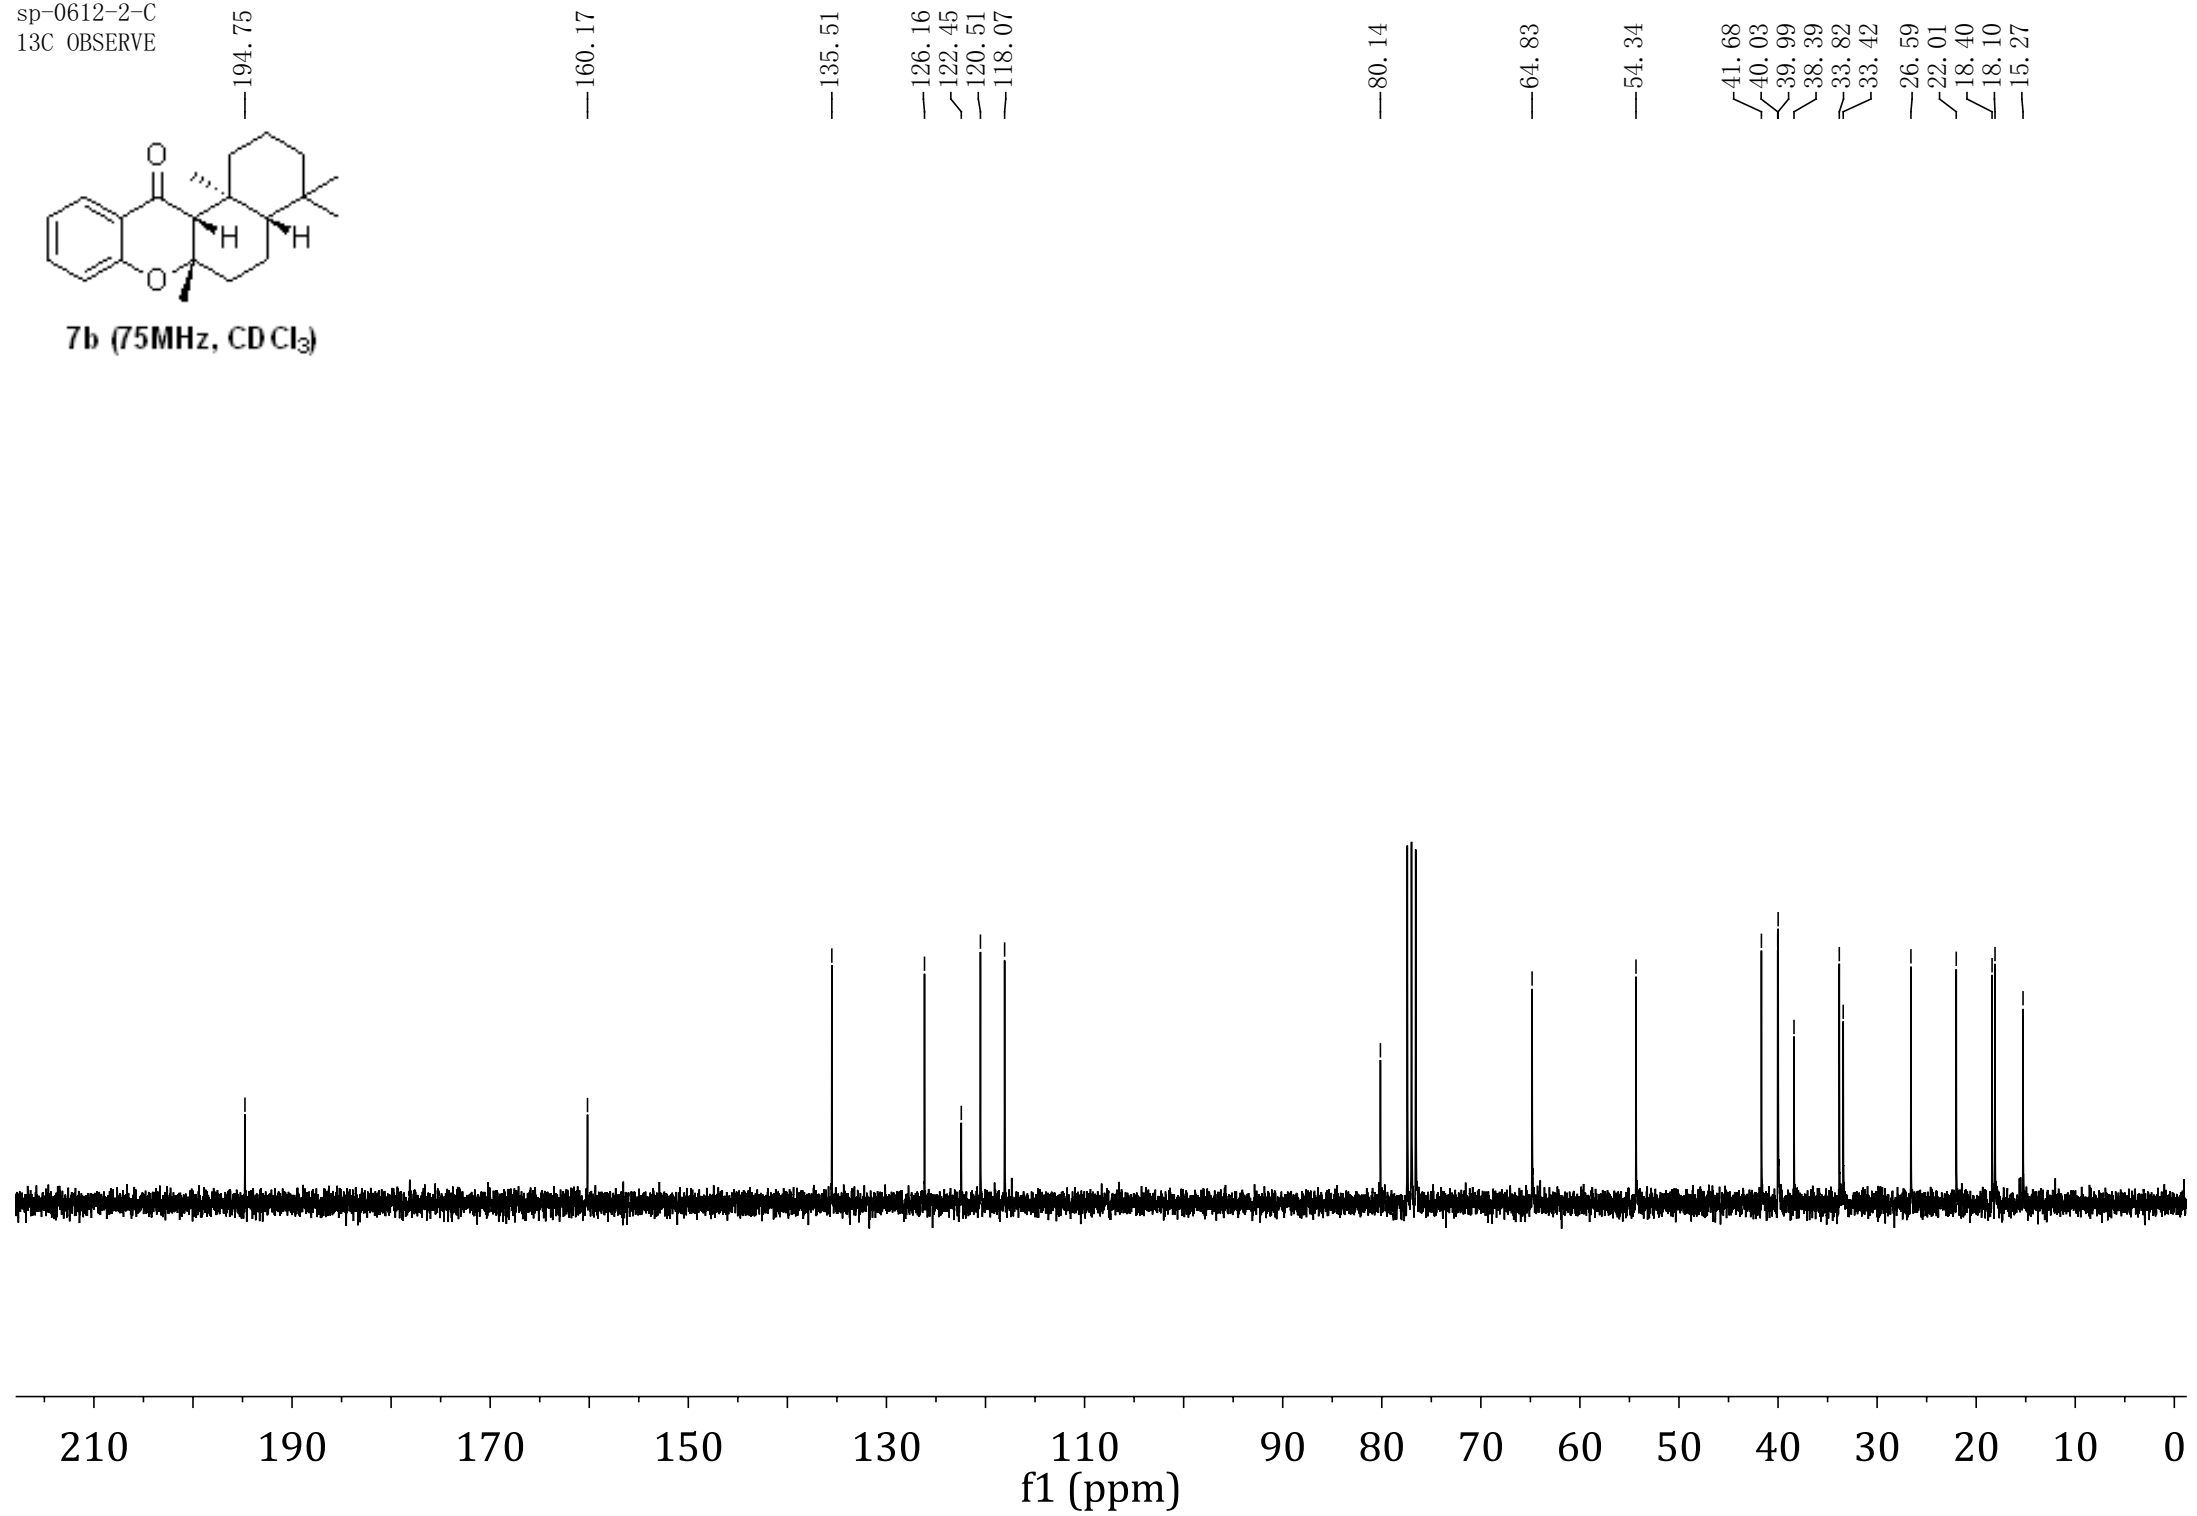

sp-0619-1-600-H  
STANDARD FLUORINE PARAMETERS

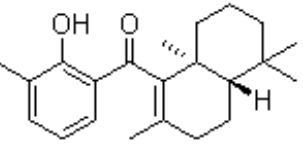

8c (600M, CDCl<sub>3</sub>)

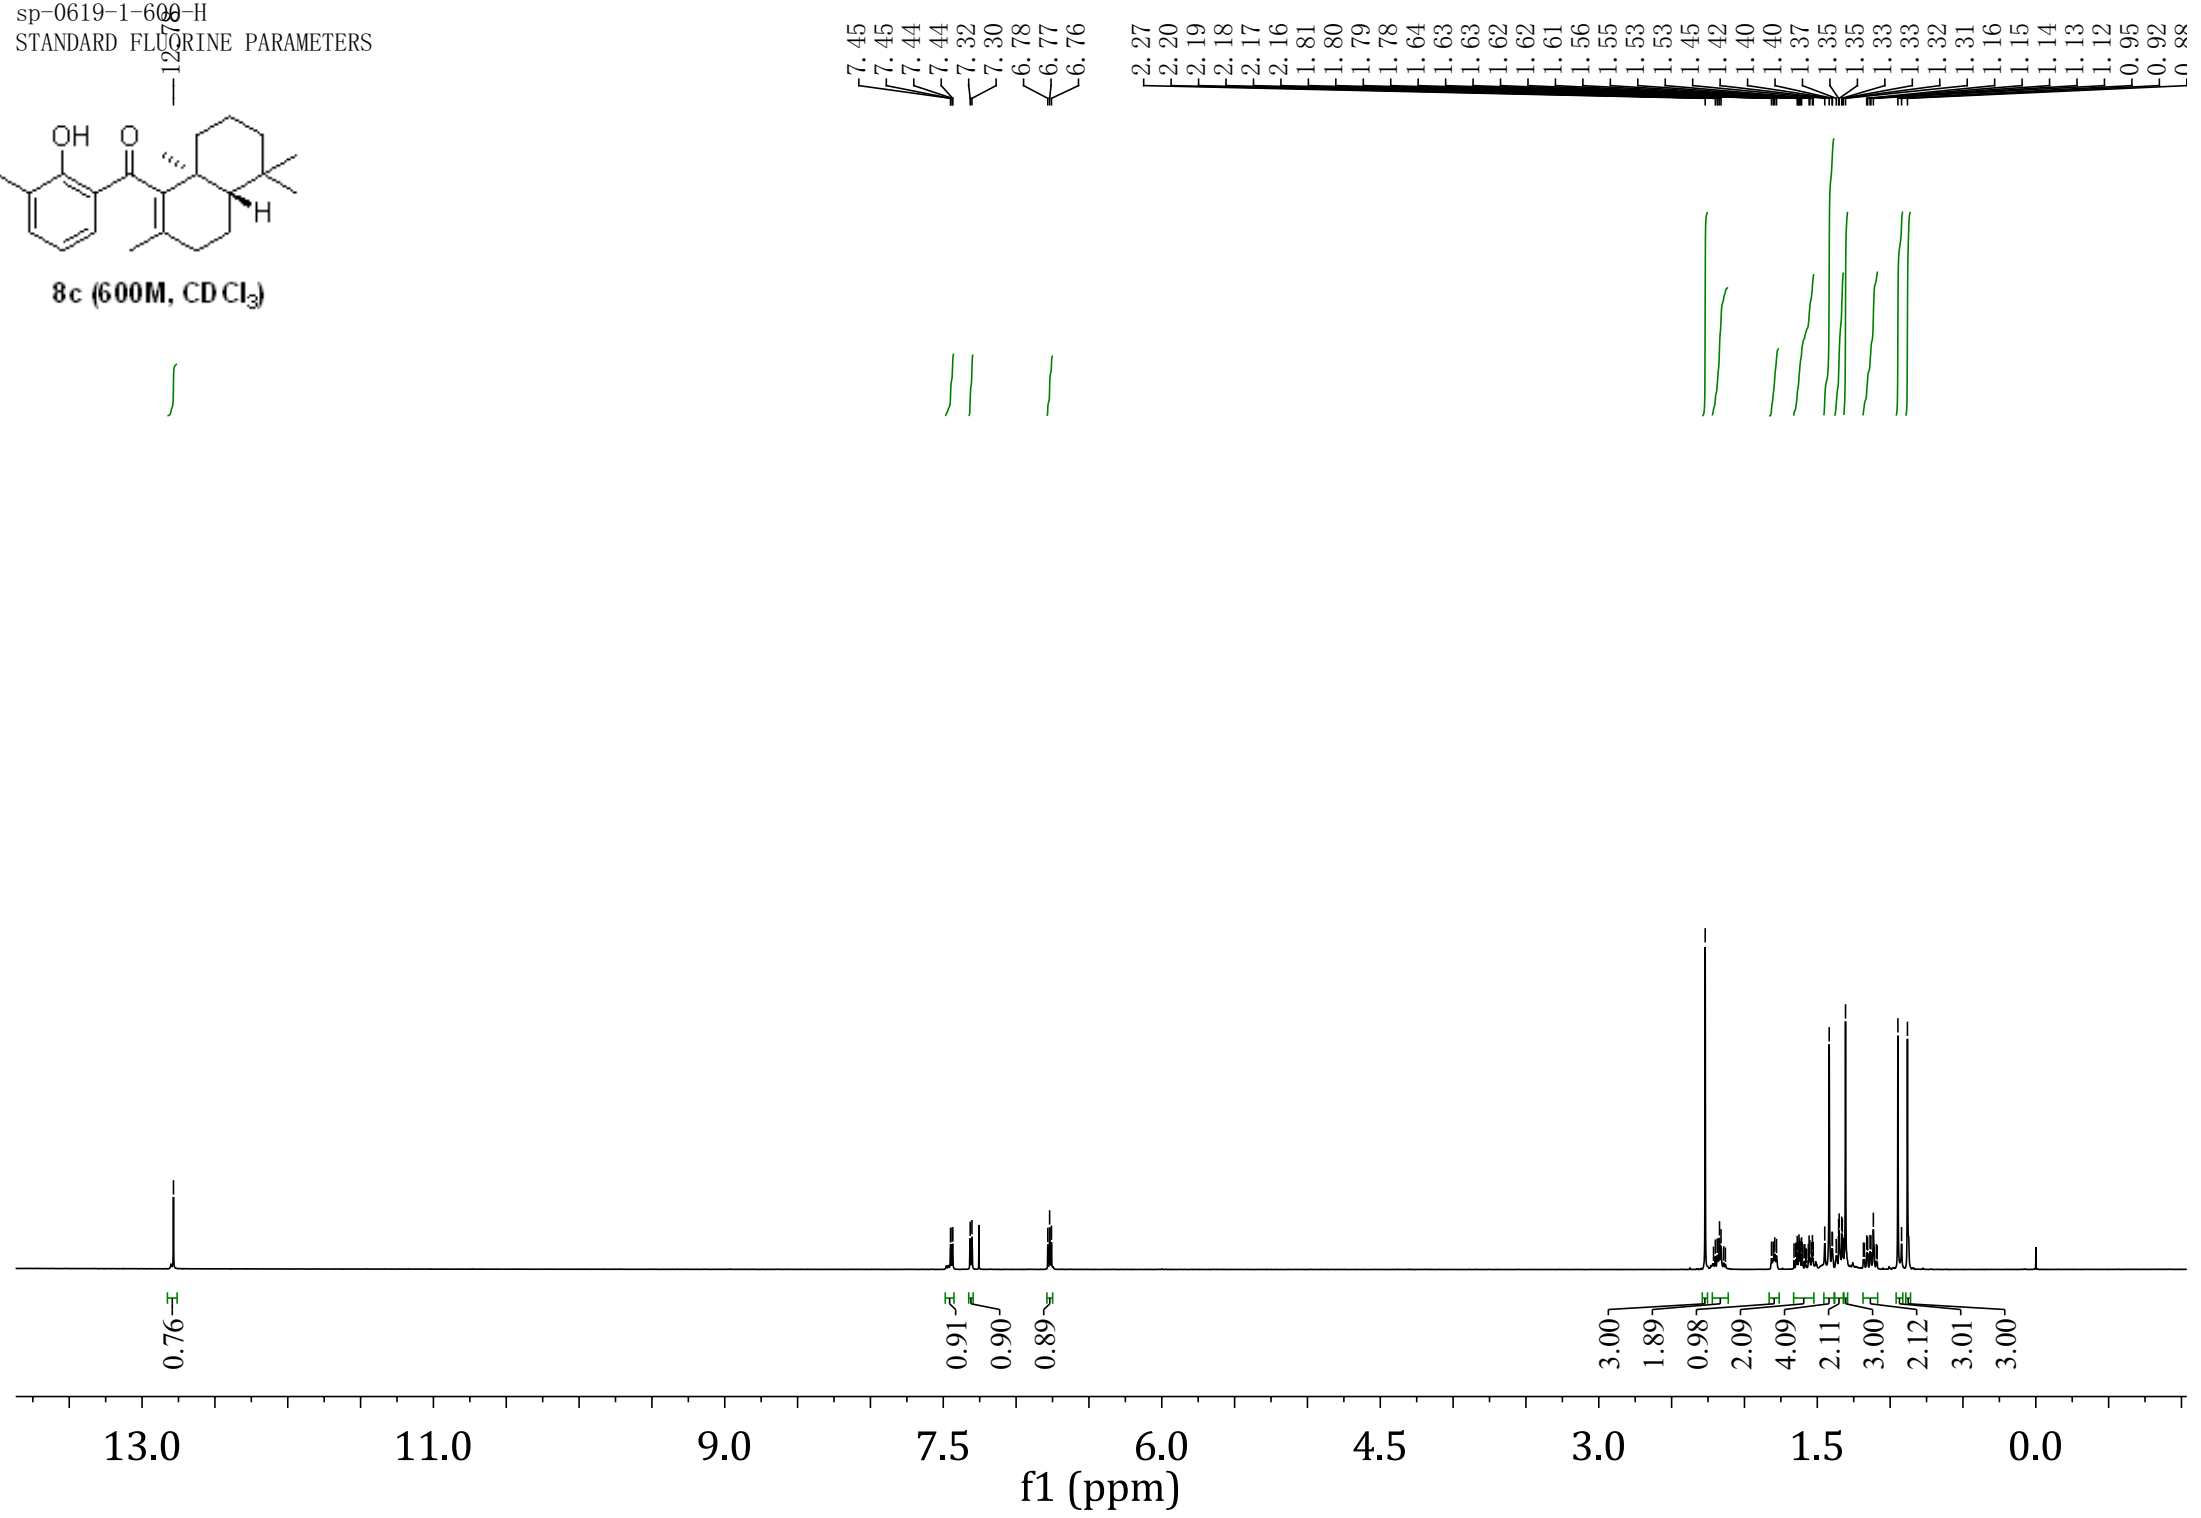

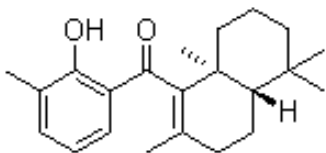

8c (151M, CDCl<sub>3</sub>)

—208.18

—161.10

—141.49

—136.85

—130.98

—130.83

—127.22

—120.38

—118.13

—50.33

—41.83

—38.27

—37.08

—33.23

—32.46

—31.93

—21.53

—21.19

—20.91

—18.63

—18.53

—15.30

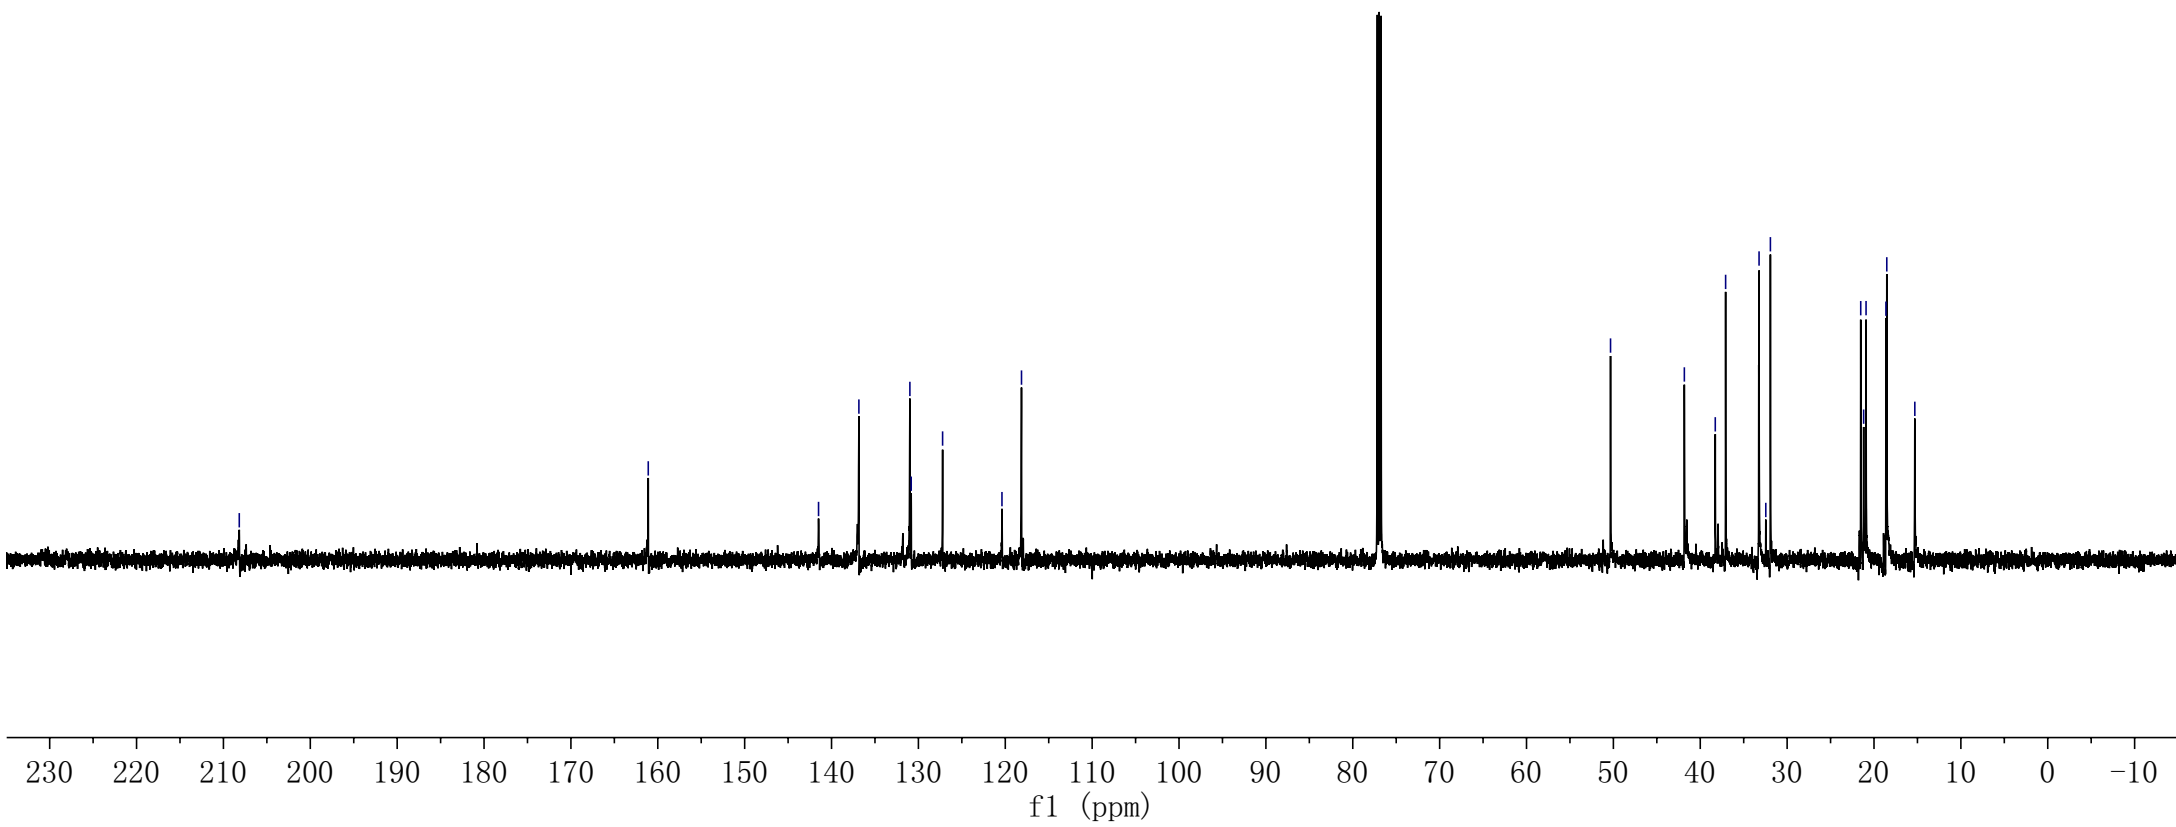

sp-180626-2-H  
STANDARD 1H OBSERVE

7.70  
7.70  
7.68  
7.67  
7.30  
7.30  
7.27  
7.27  
6.86  
6.83  
6.81

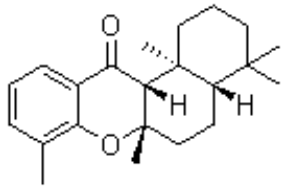

7c (300MHz, CDCl<sub>3</sub>)

2.32  
2.31  
2.28  
2.27  
2.27  
2.21  
1.95  
1.66  
1.66  
1.62  
1.43  
1.42  
1.26  
1.22  
0.94  
0.93  
0.91  
0.90  
0.85  
0.81

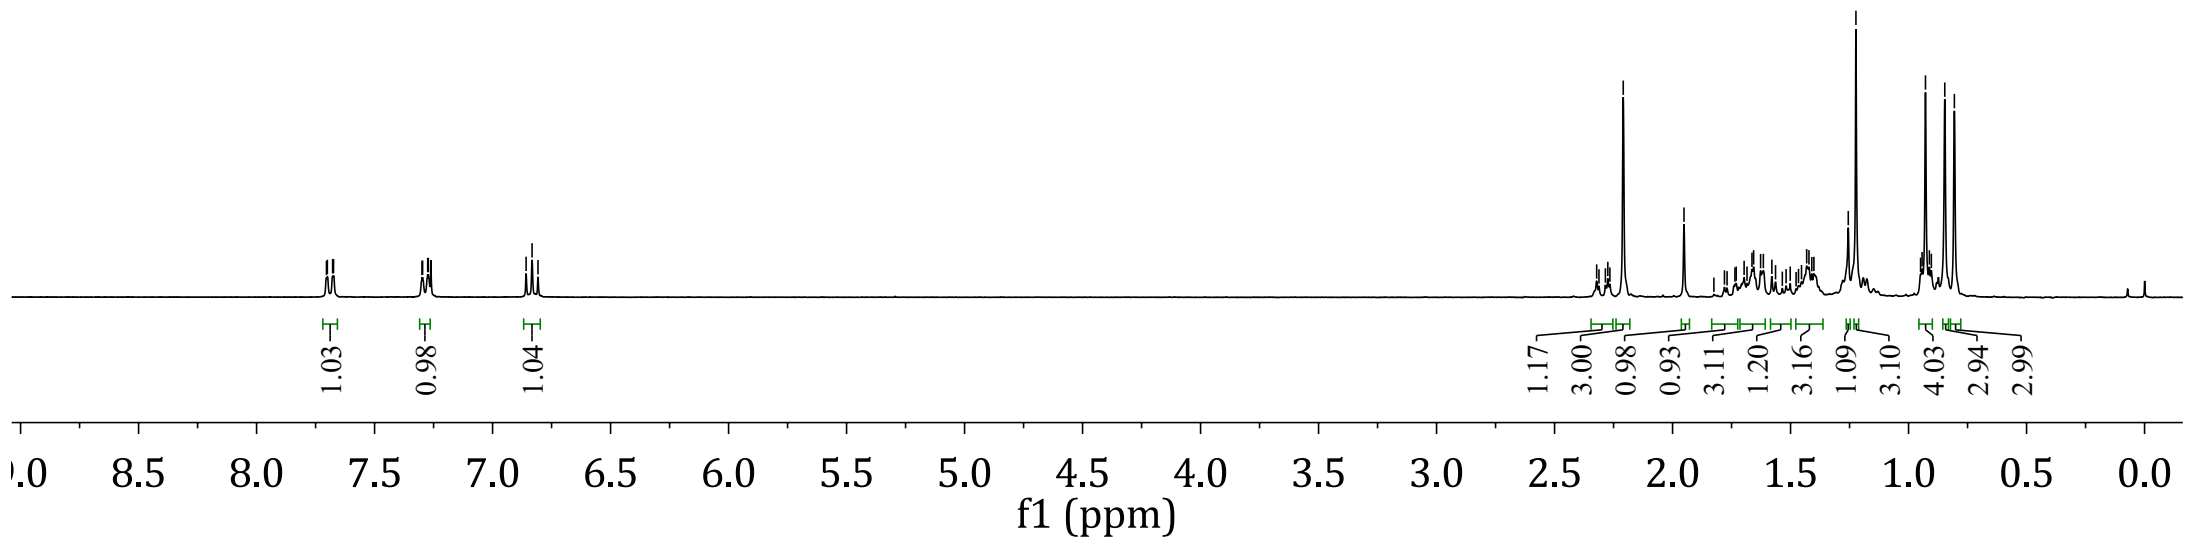

sp-180626-2-C  
13C OBSERVE

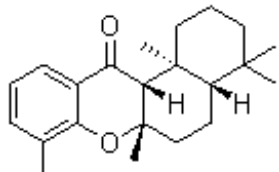

7c (75MHz, CDCl<sub>3</sub>)

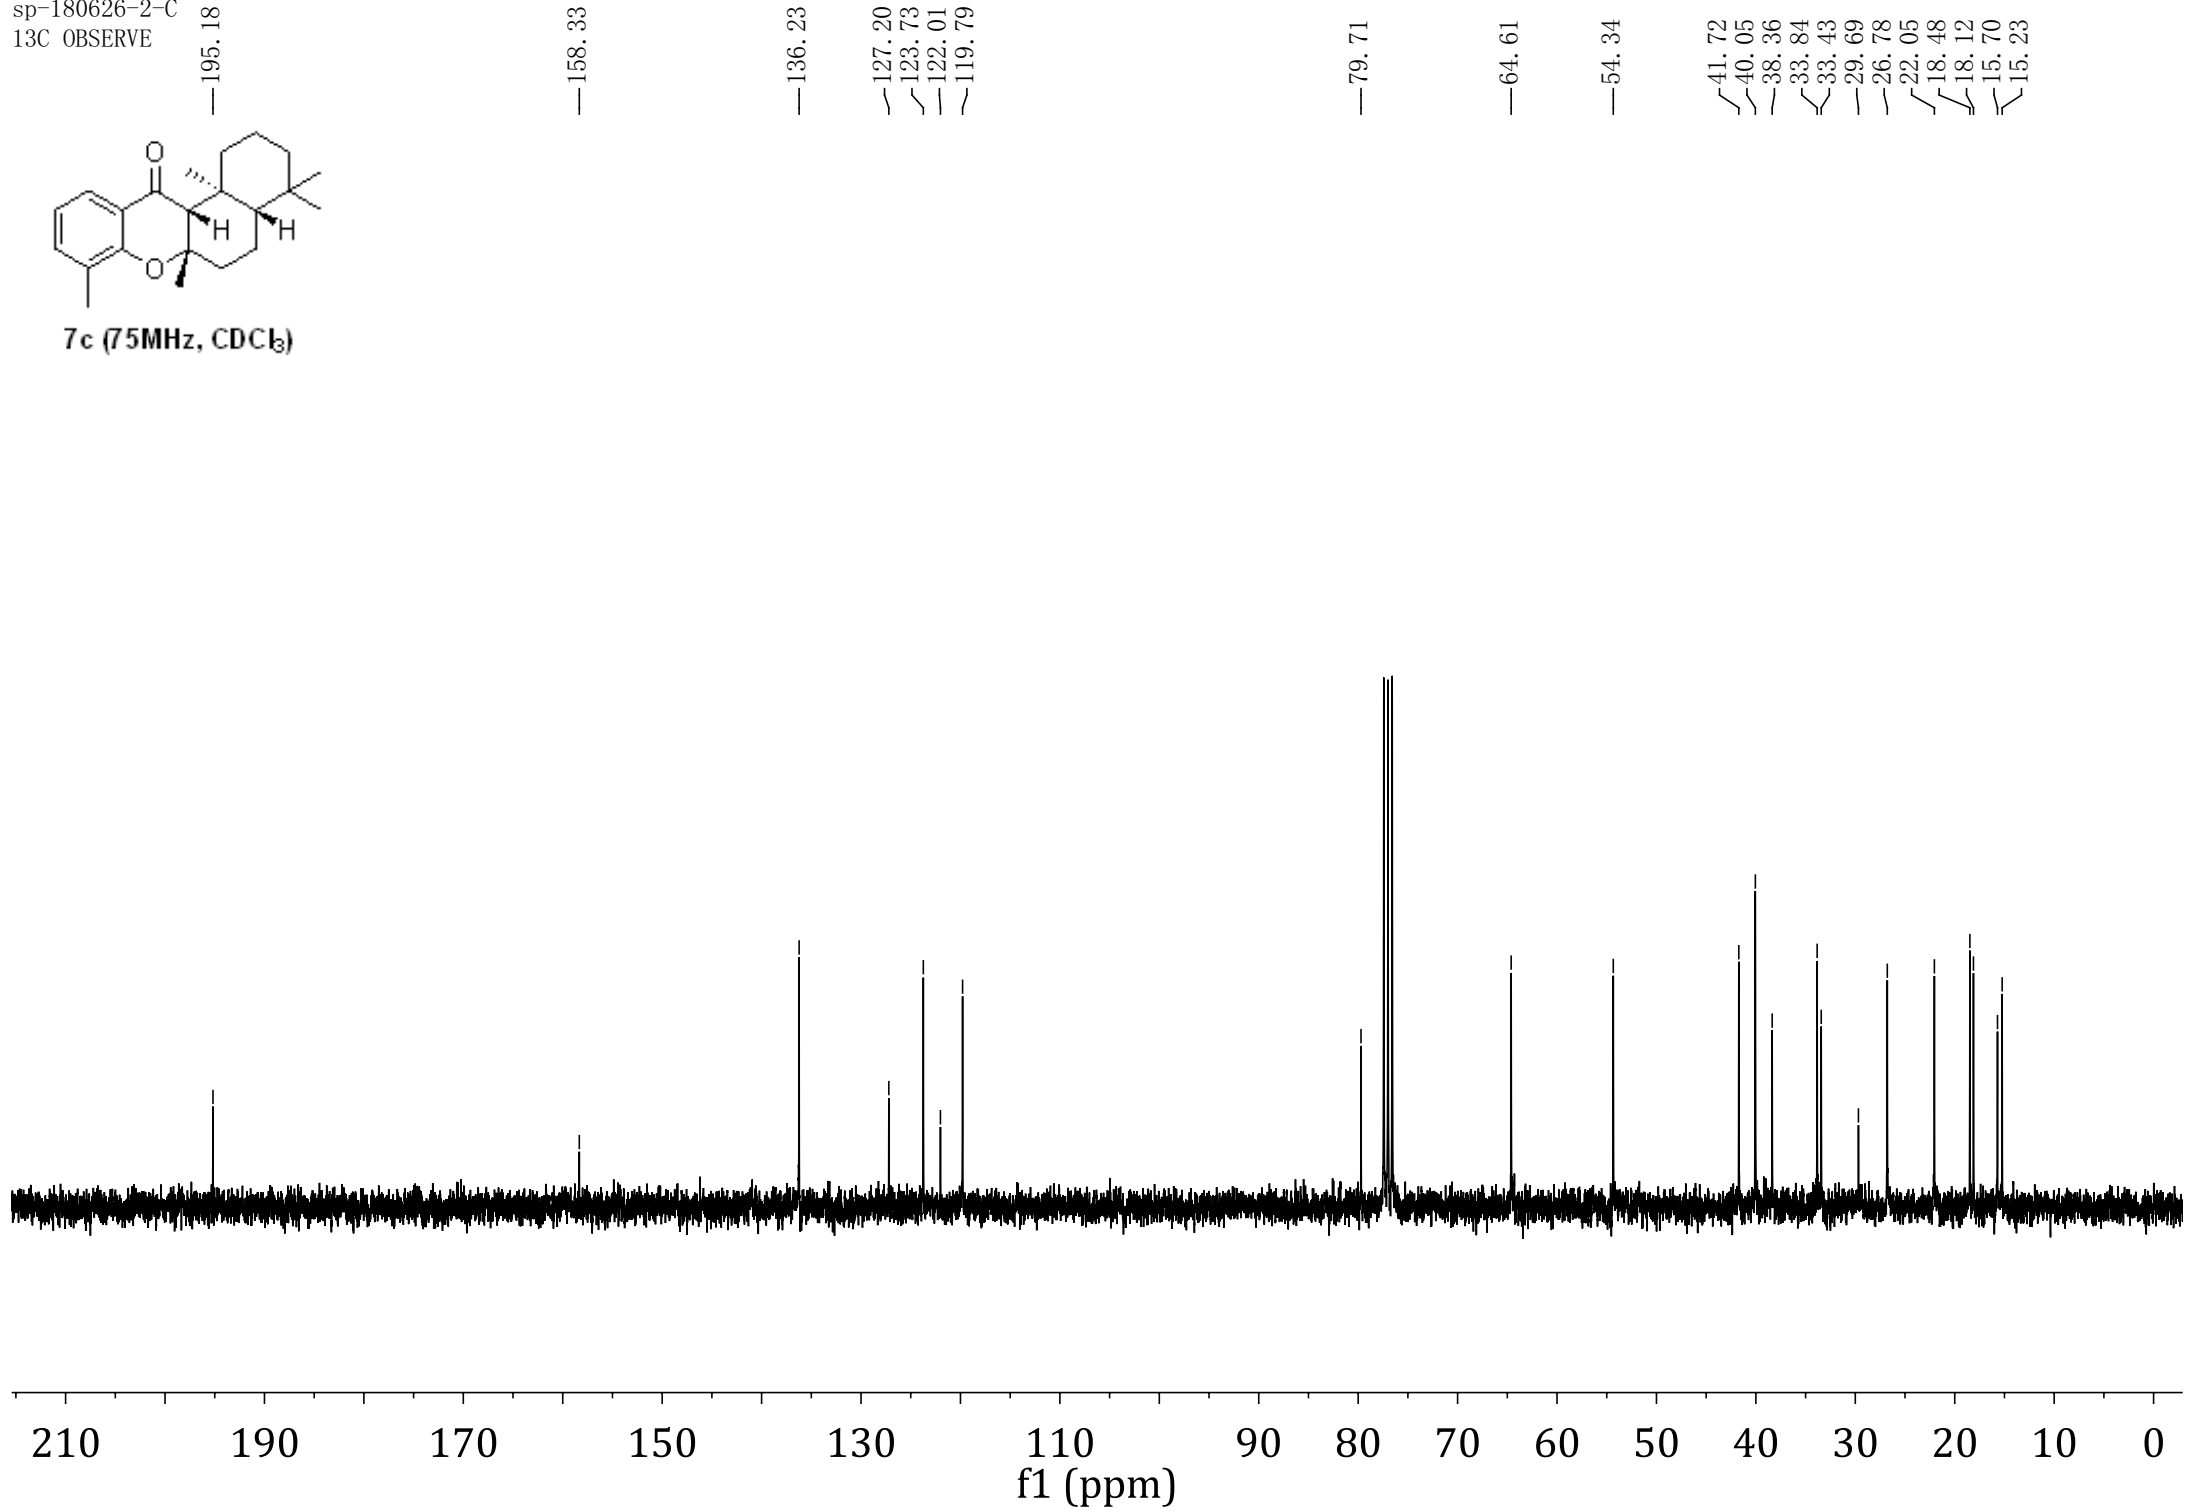

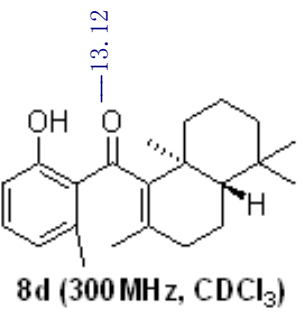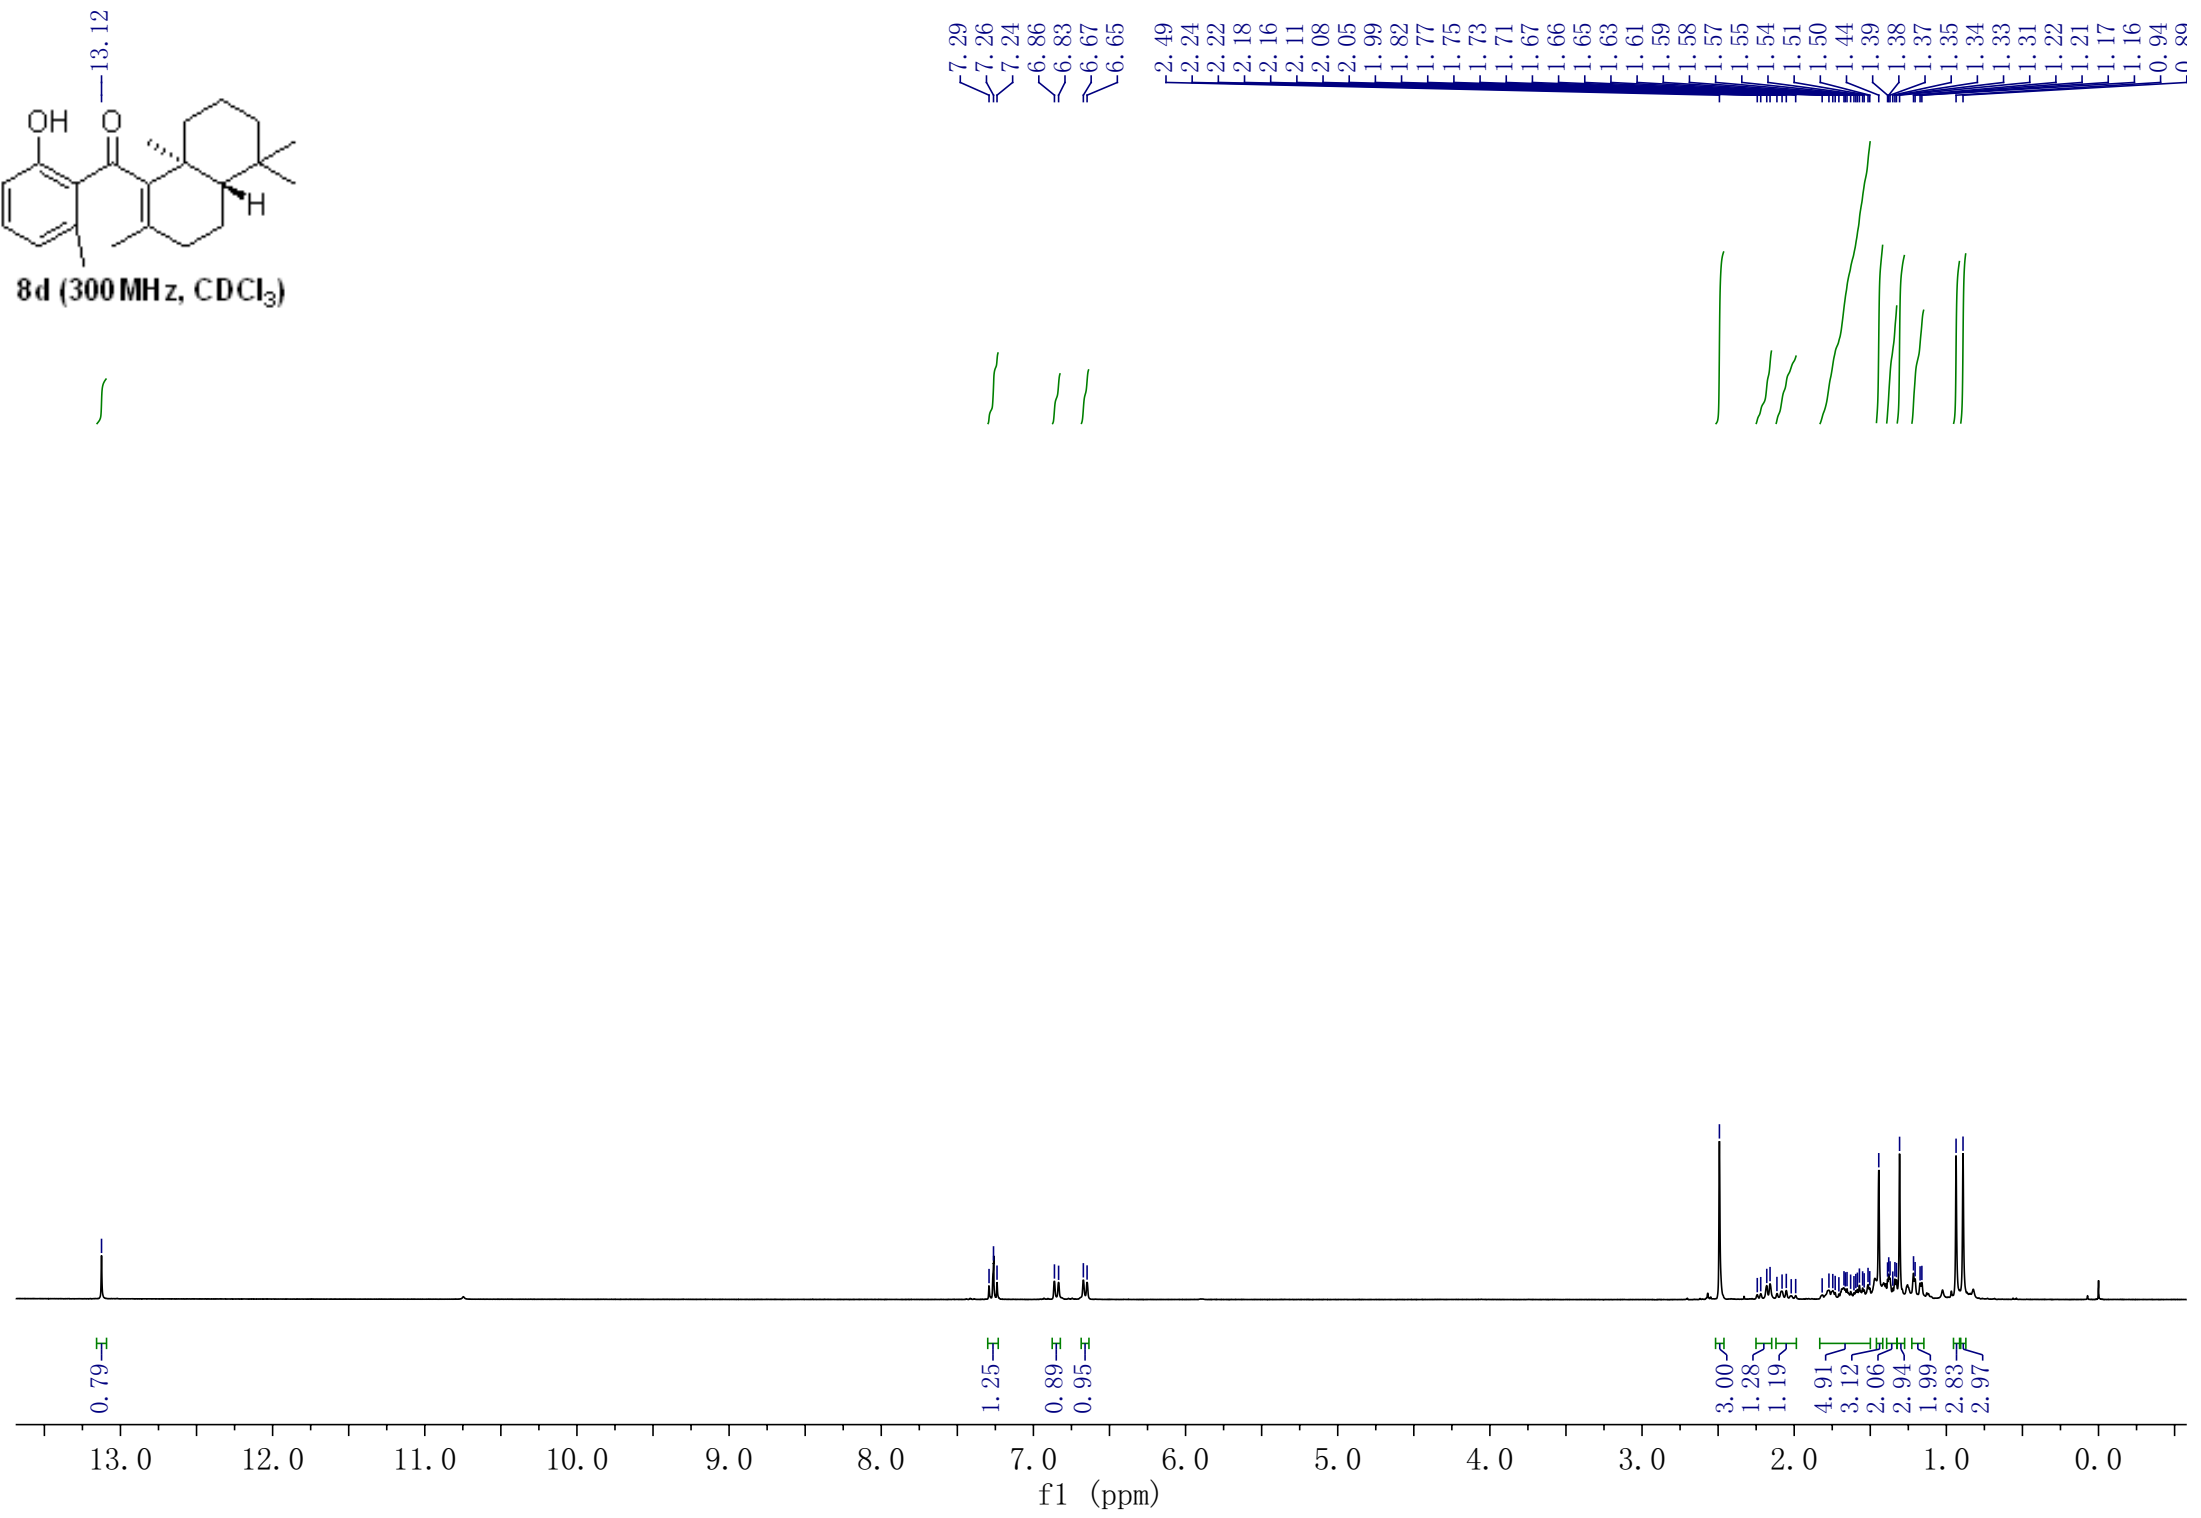



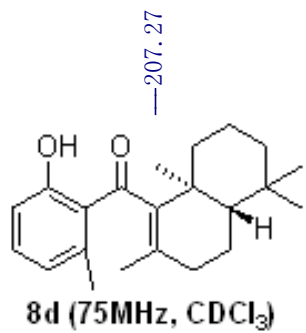

—163.91

144.64  
140.30  
134.99  
131.88

123.13  
122.34  
116.99

—49.96

41.87  
38.73  
35.66  
33.39  
33.33  
32.21  
23.35  
22.66  
21.62  
20.89  
18.76  
18.53

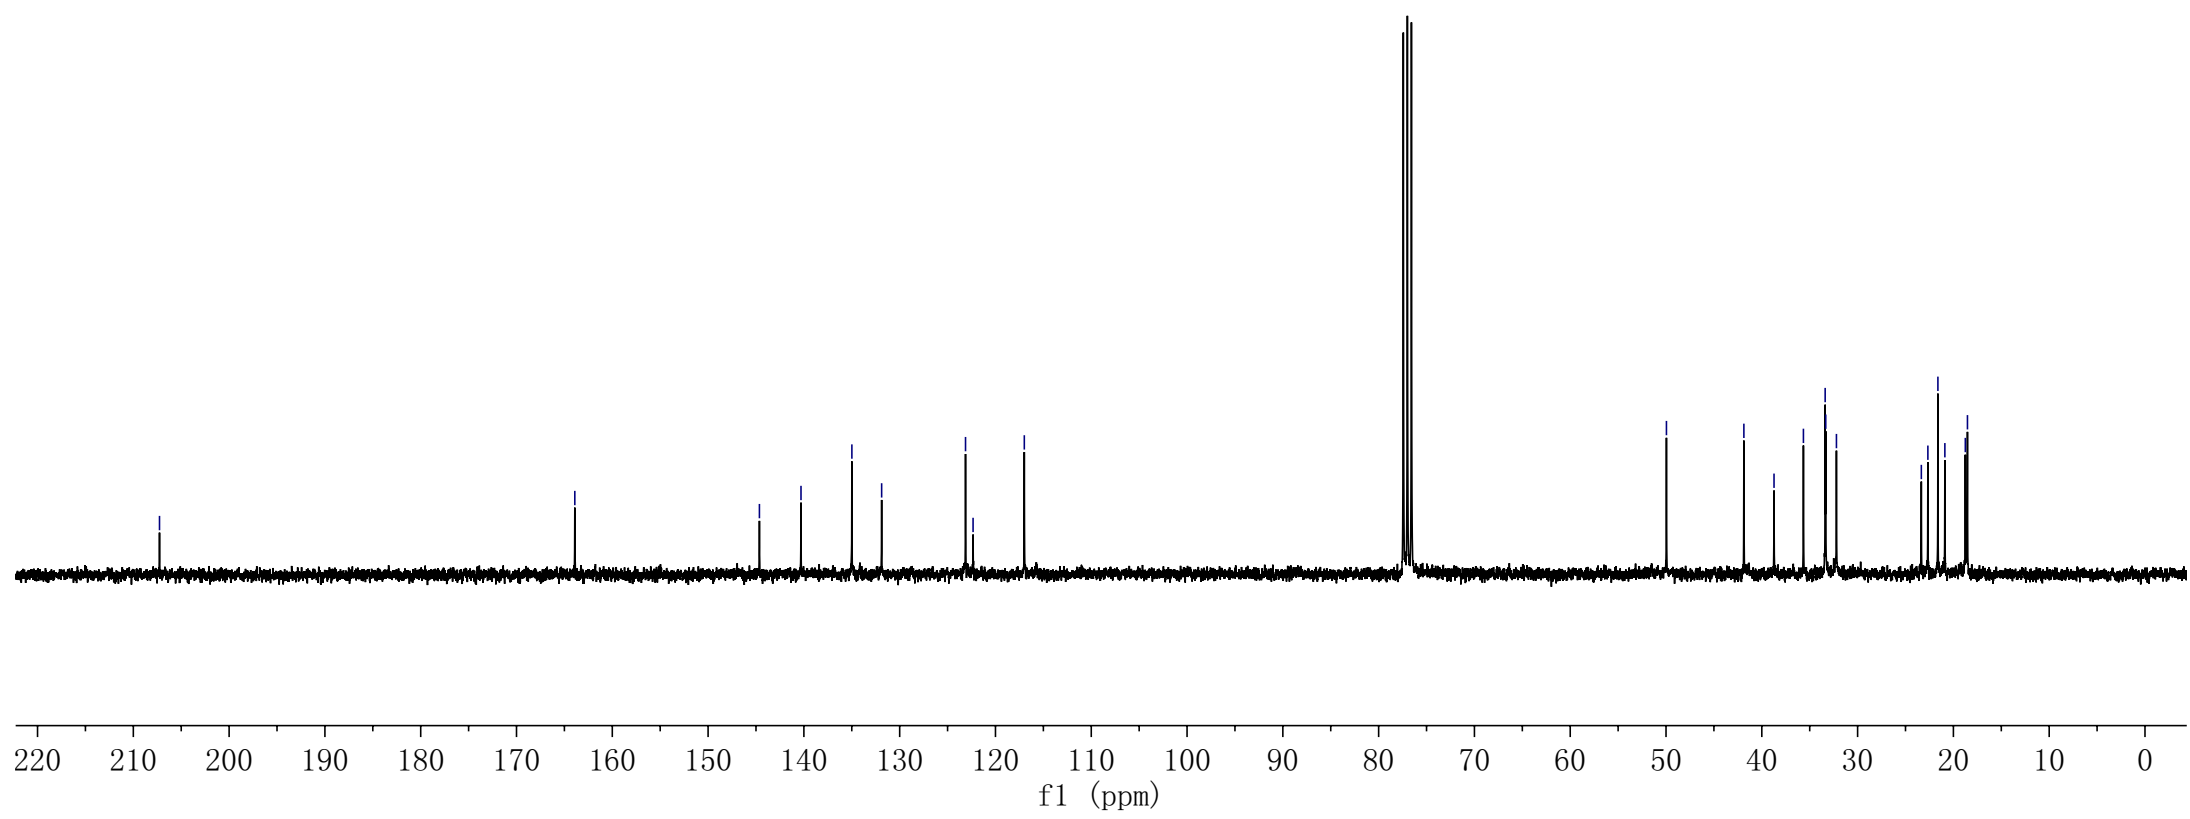

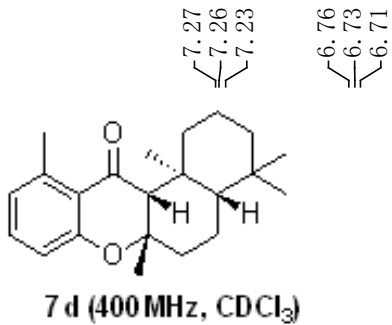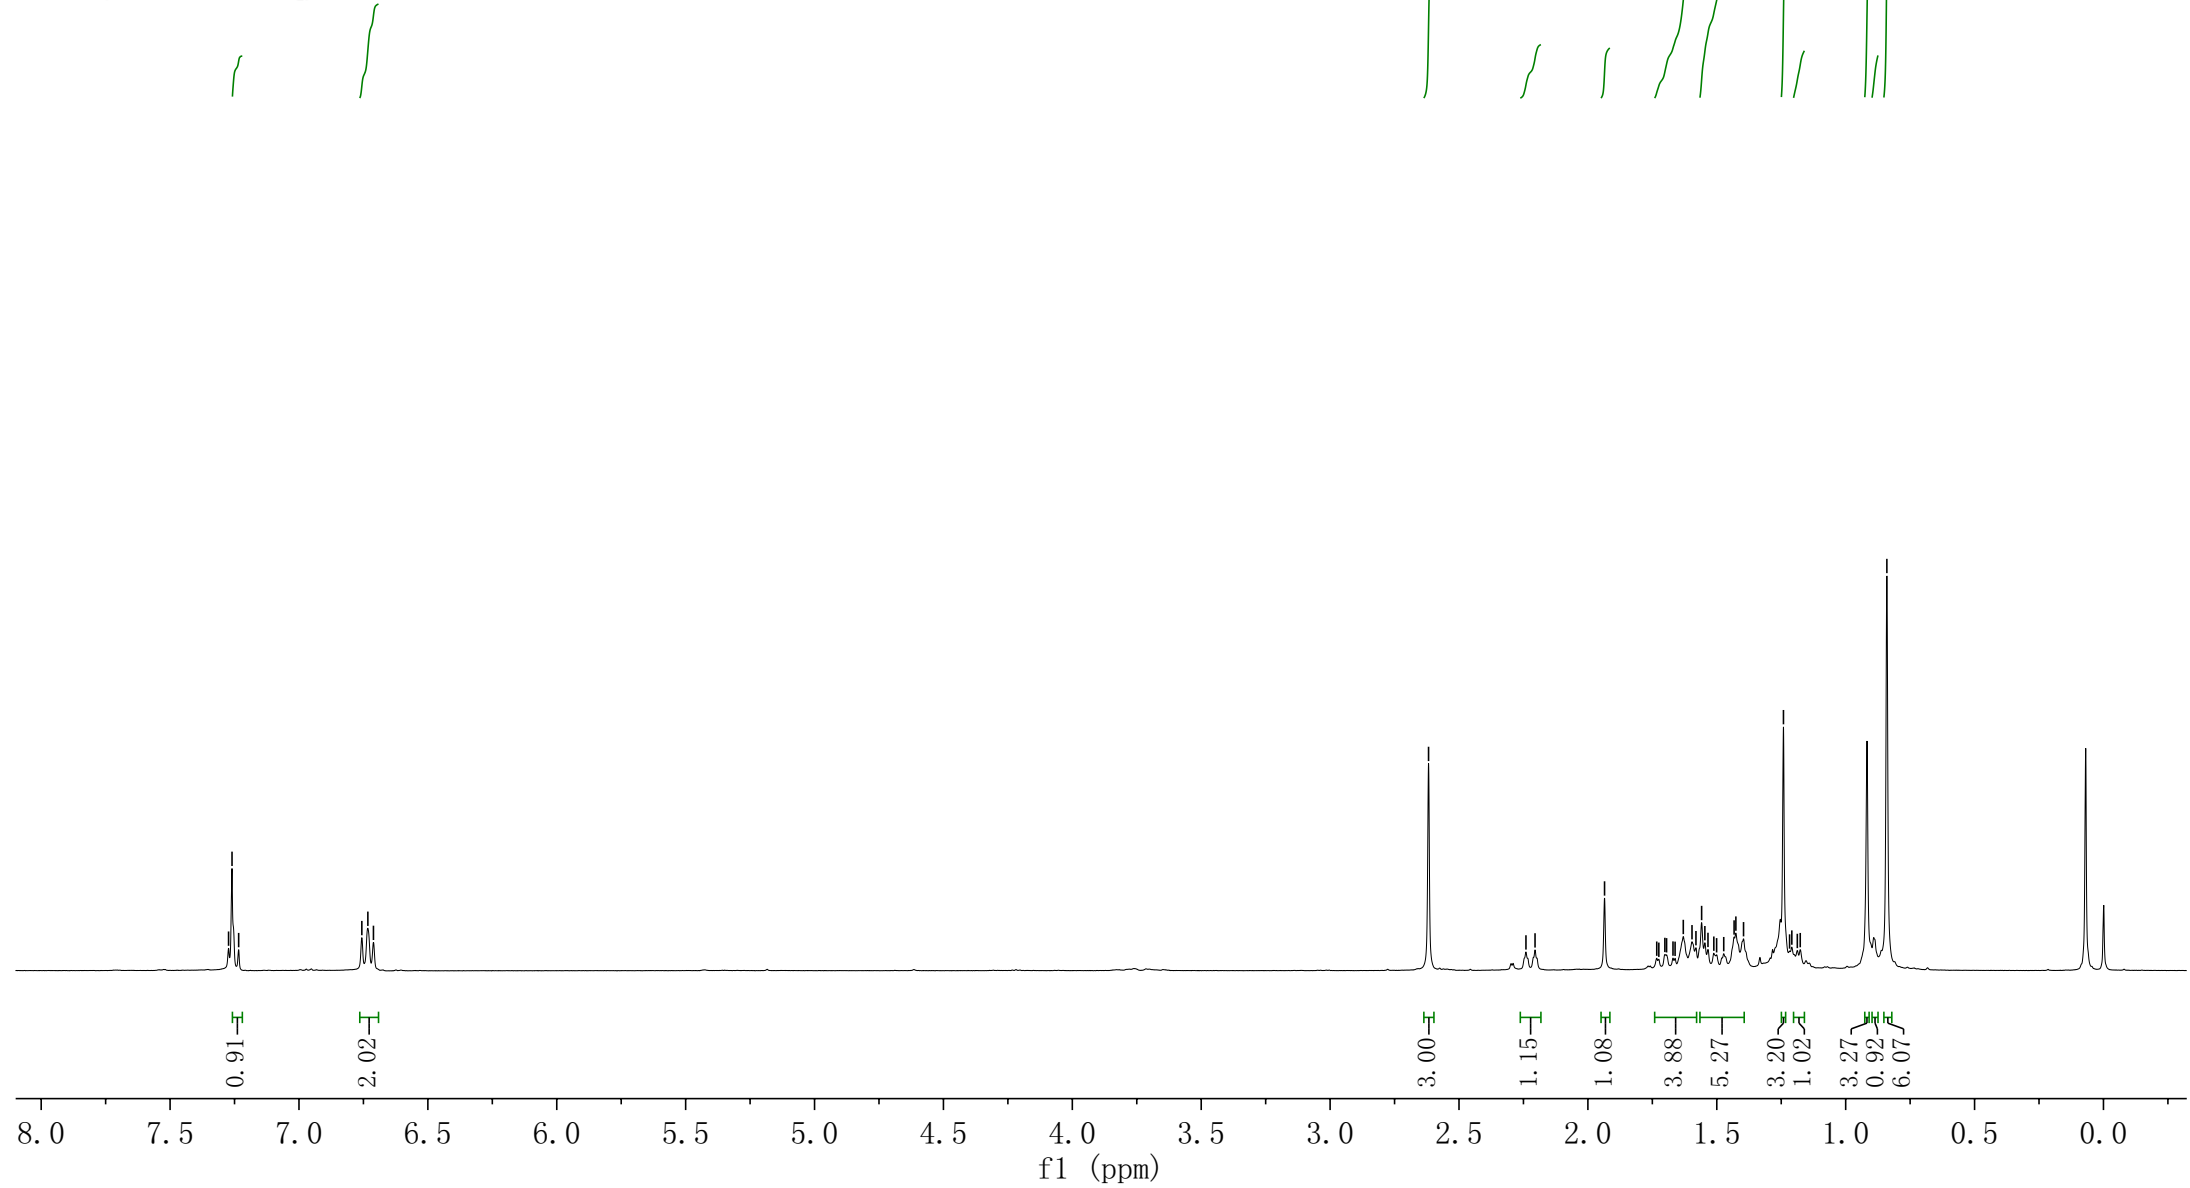

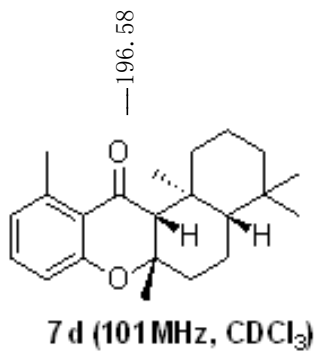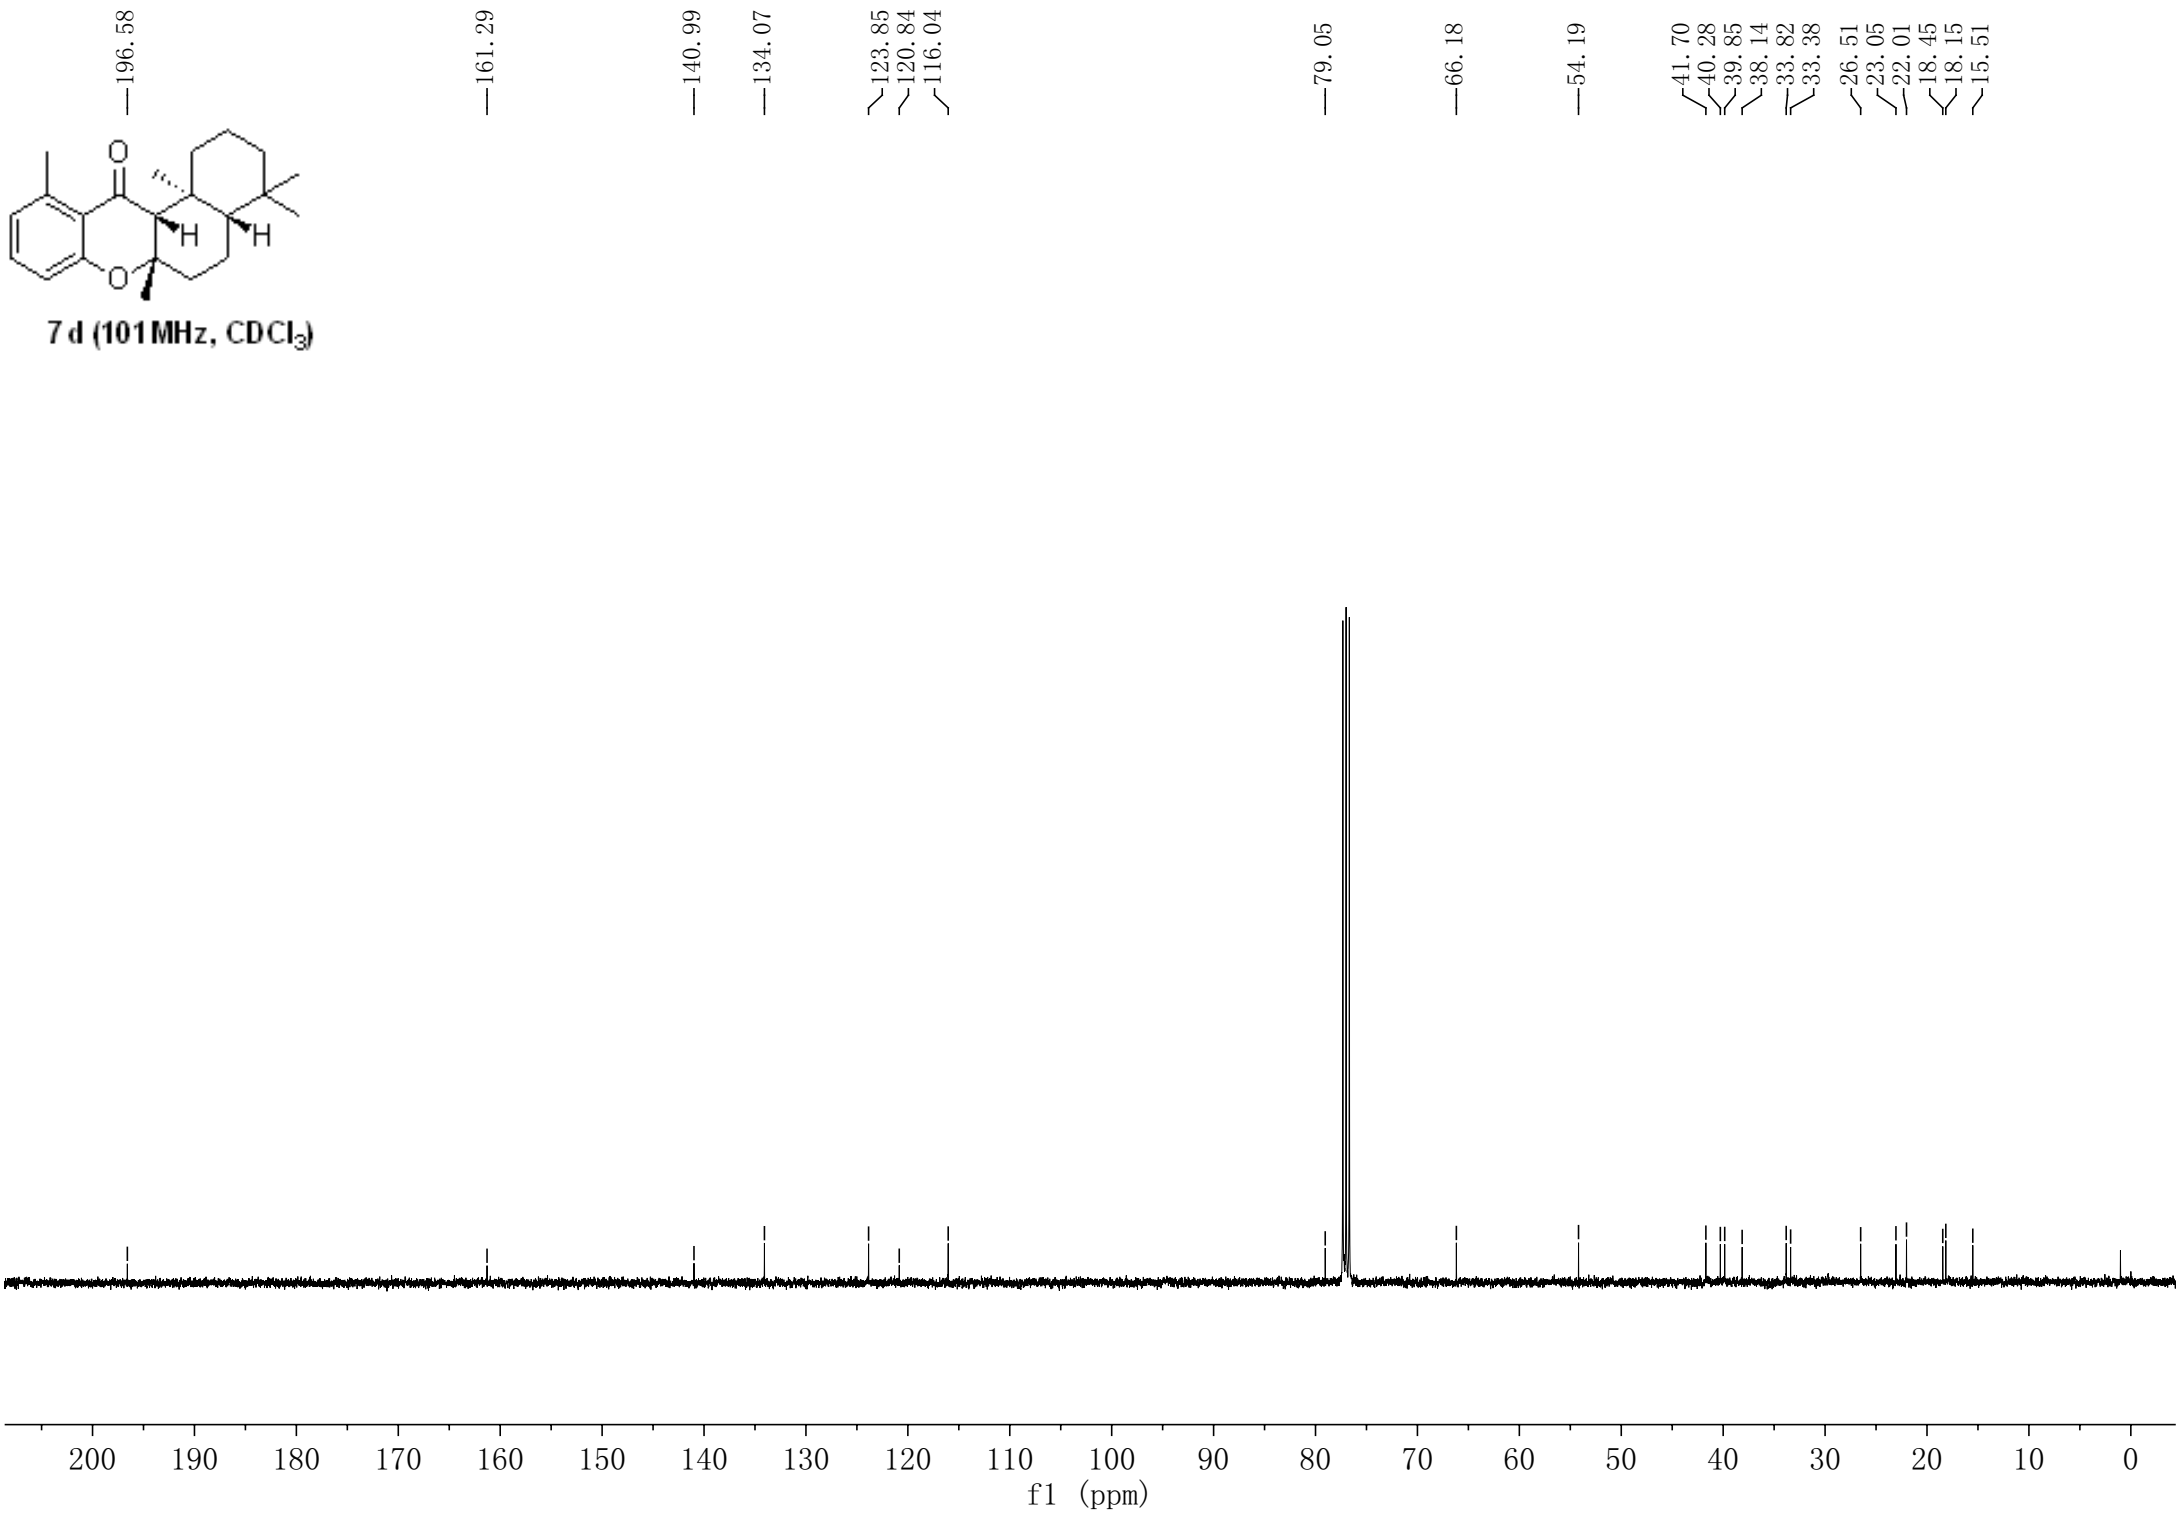

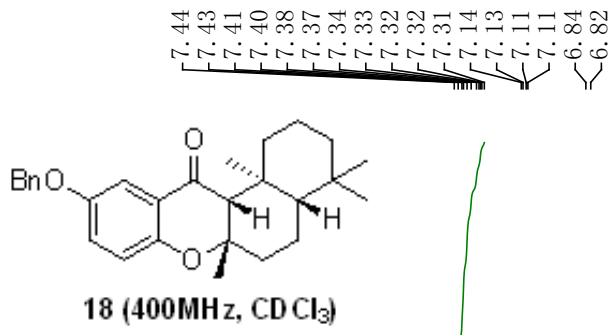

7.44  
 7.43  
 7.41  
 7.40  
 7.38  
 7.37  
 7.34  
 7.33  
 7.32  
 7.31  
 7.14  
 7.13  
 7.11  
 7.11  
 6.84  
 6.82

—5.03

2.26  
 2.25  
 2.25  
 2.23  
 2.22  
 2.21  
 1.94  
 1.66  
 1.44  
 1.44  
 1.43  
 1.41  
 1.41  
 1.23  
 0.90  
 0.90  
 0.85

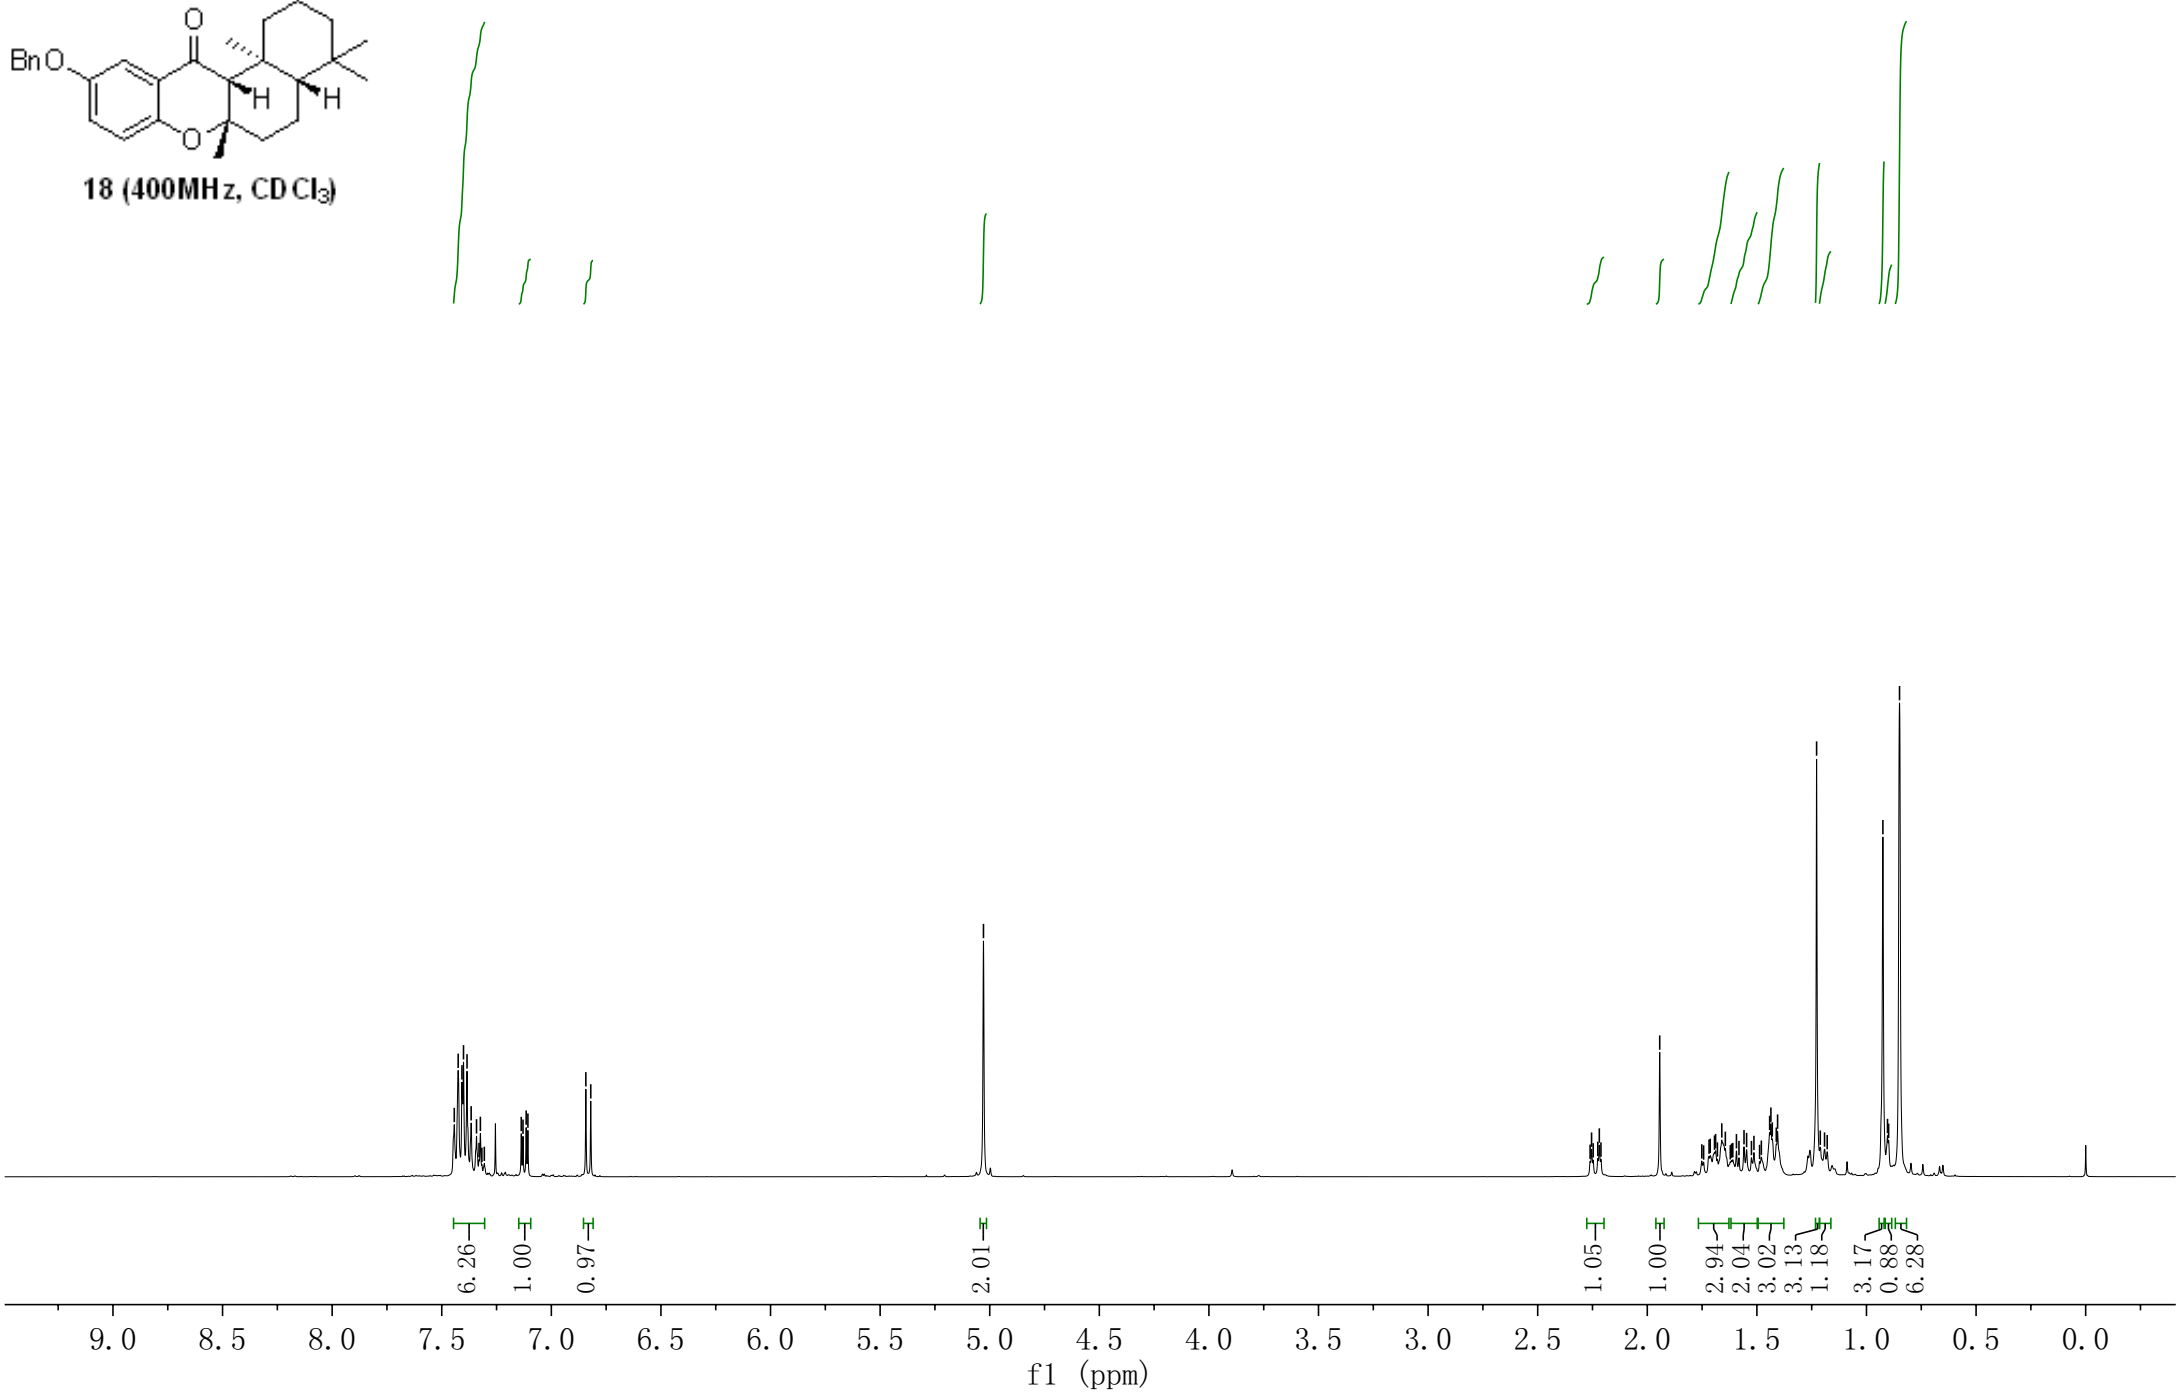

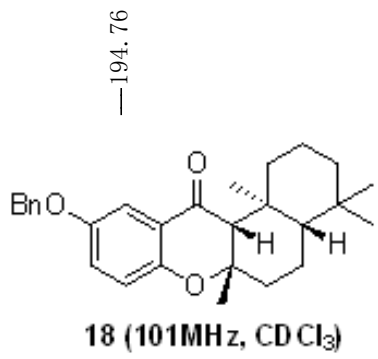

- 194.76
- 154.86
- 152.74
- 136.82
- 128.54
- 127.99
- 127.65
- 125.15
- 122.11
- 119.37
- 108.21
- 80.01
- 70.60
- 64.64
- 54.34
- 41.67
- 40.07
- 40.01
- 38.45
- 33.82
- 33.44
- 26.50
- 22.02
- 18.40
- 18.12
- 15.26

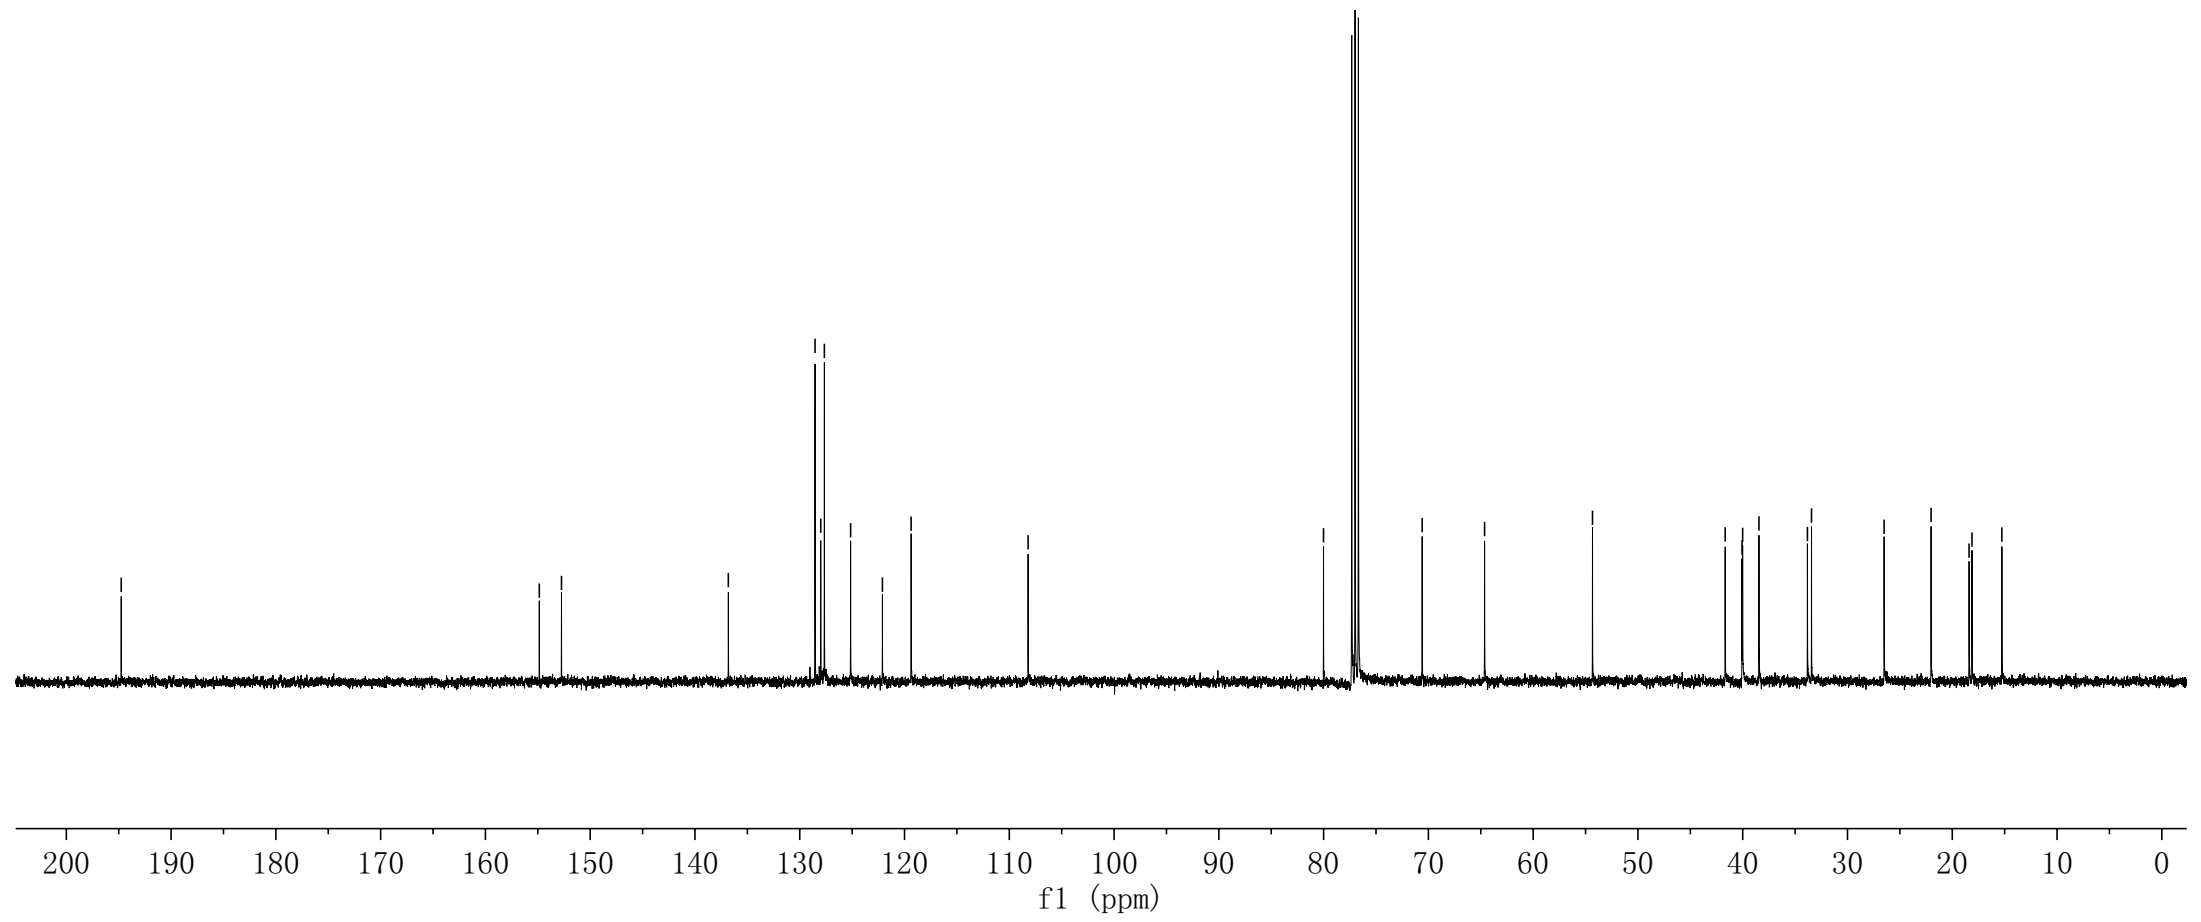

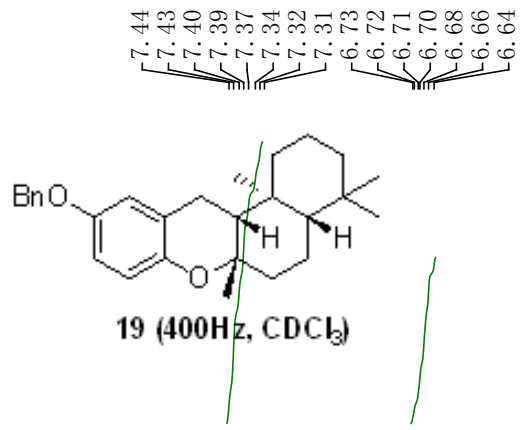

—4.97

2.14, 2.13, 2.11, 2.09, 1.85, 1.81, 1.59, 1.58, 1.56, 1.54, 1.30, 1.28, 0.89, 0.88, 0.81, 0.72

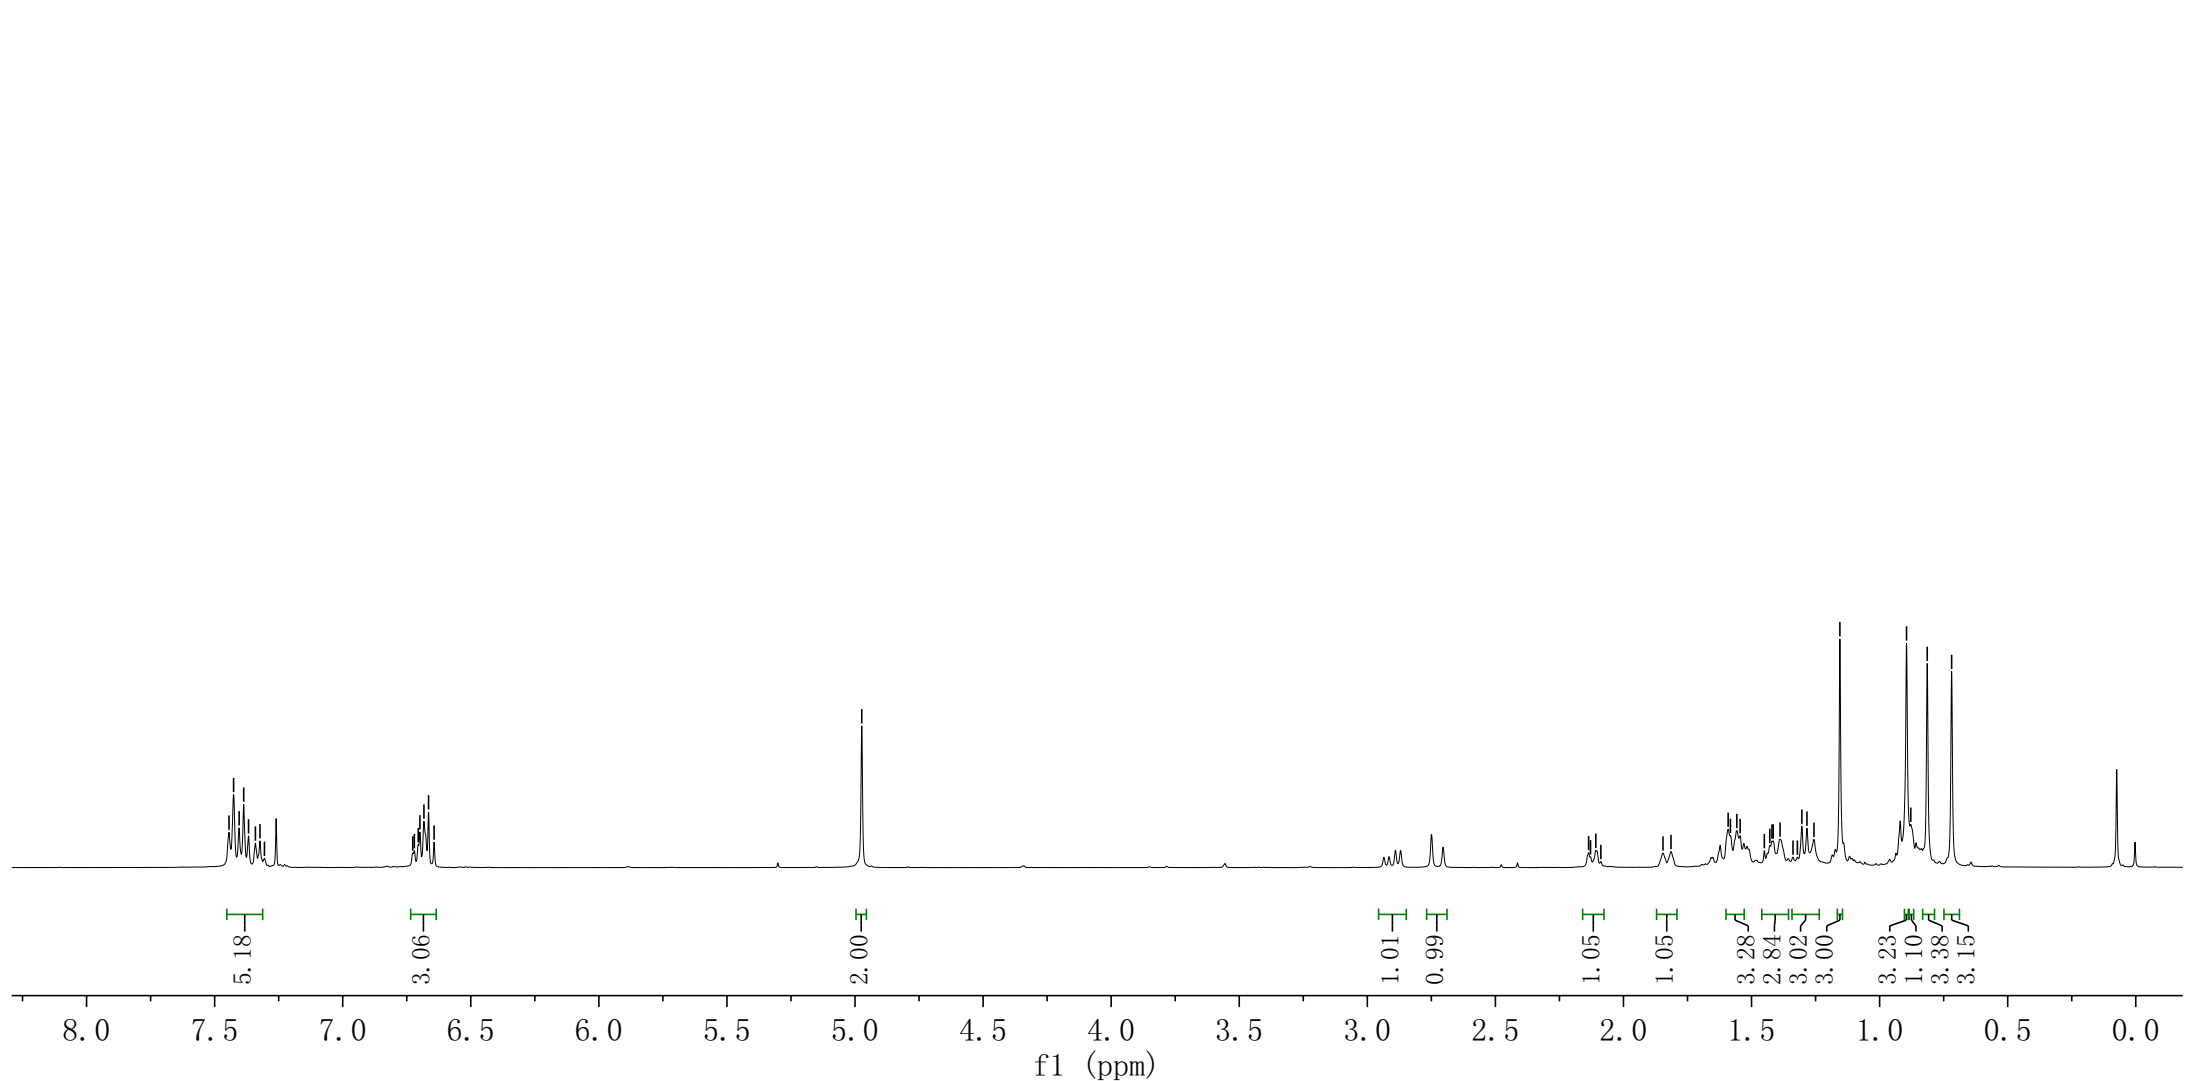

化合物7

—152.21  
—148.82  
—137.44

128.48  
127.80  
127.56  
123.35  
117.38  
114.37  
113.27

—75.27  
—70.48

—55.25  
—49.51

41.86  
40.67  
39.99  
38.29  
33.70  
33.21

27.16  
23.01  
21.86  
18.44  
18.24  
14.23

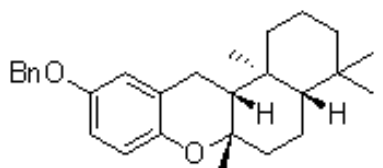

19 (101Hz, CDCl<sub>3</sub>)

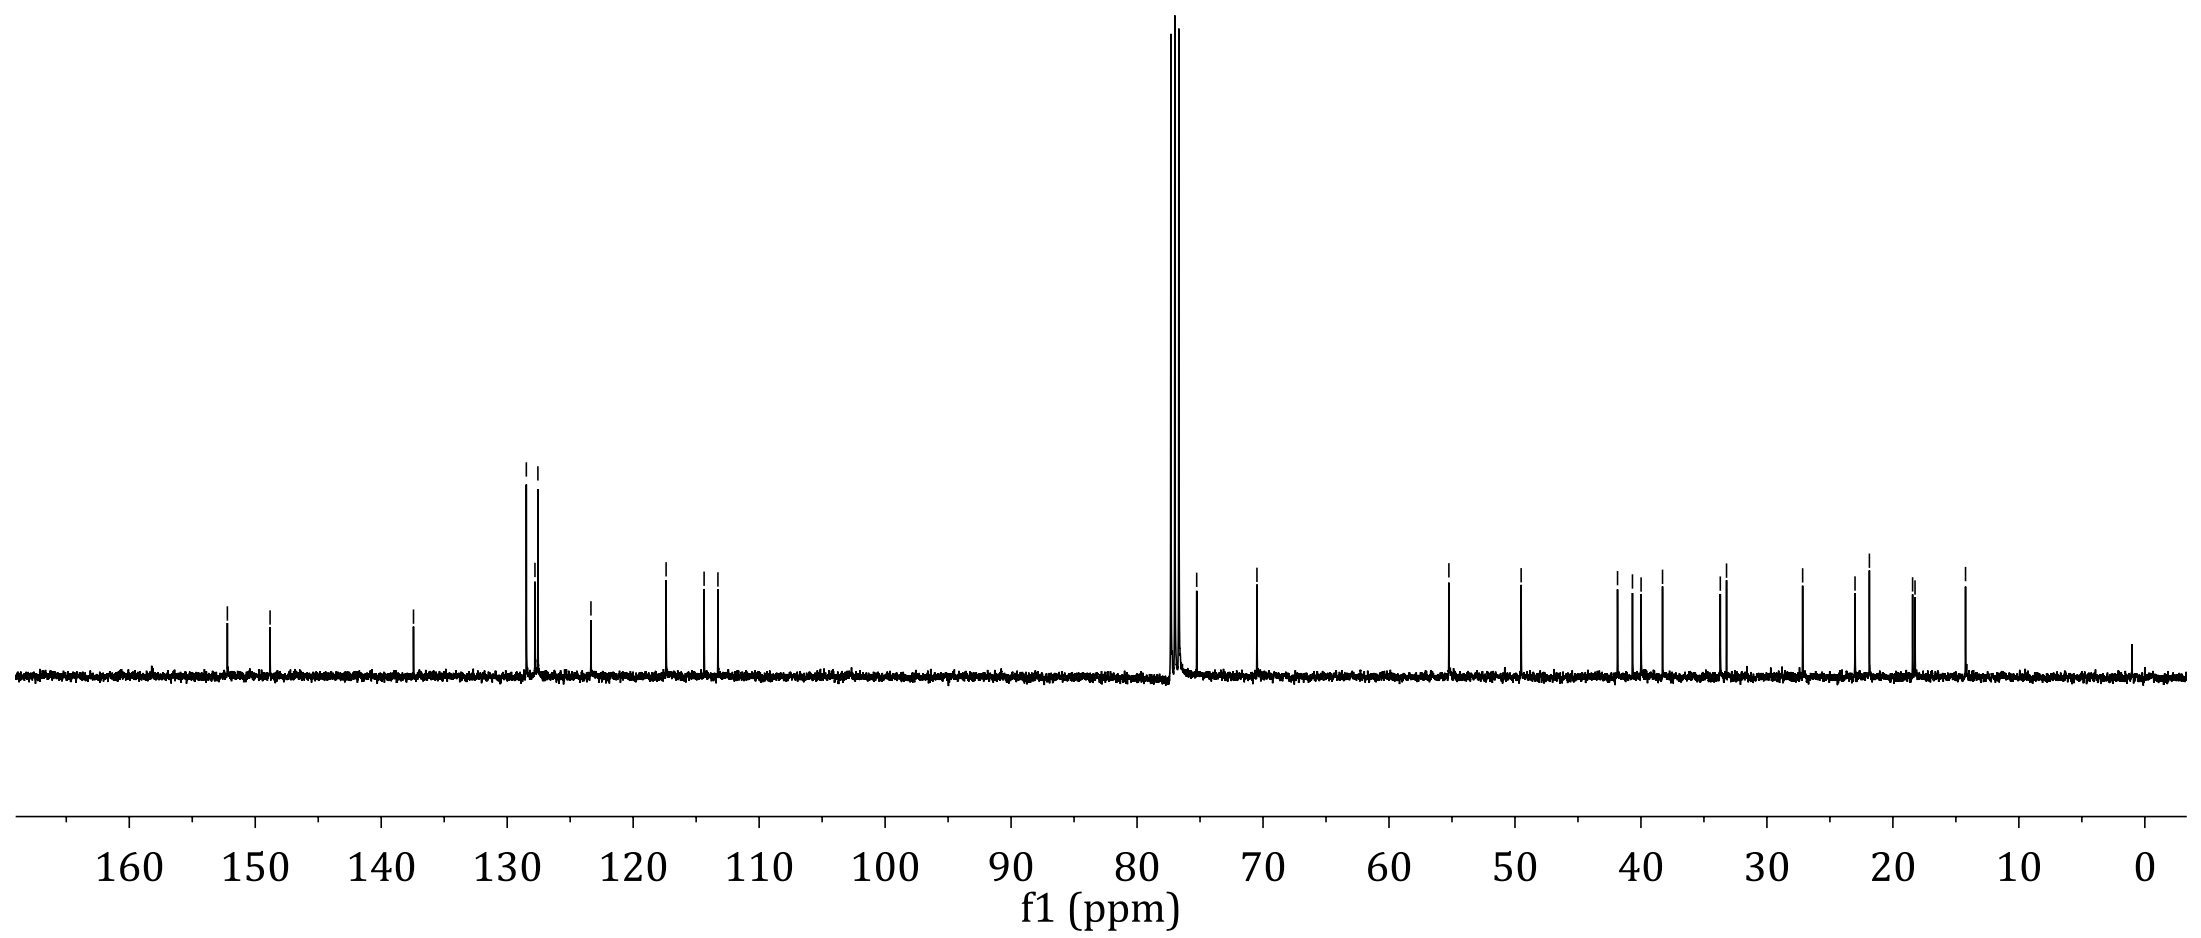

PROTON\_01

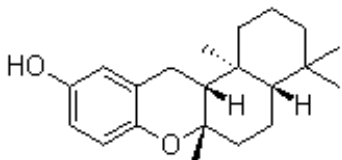

8-*epi*-chromazonarol (2)  
(600 MHz, CDCl<sub>3</sub>)

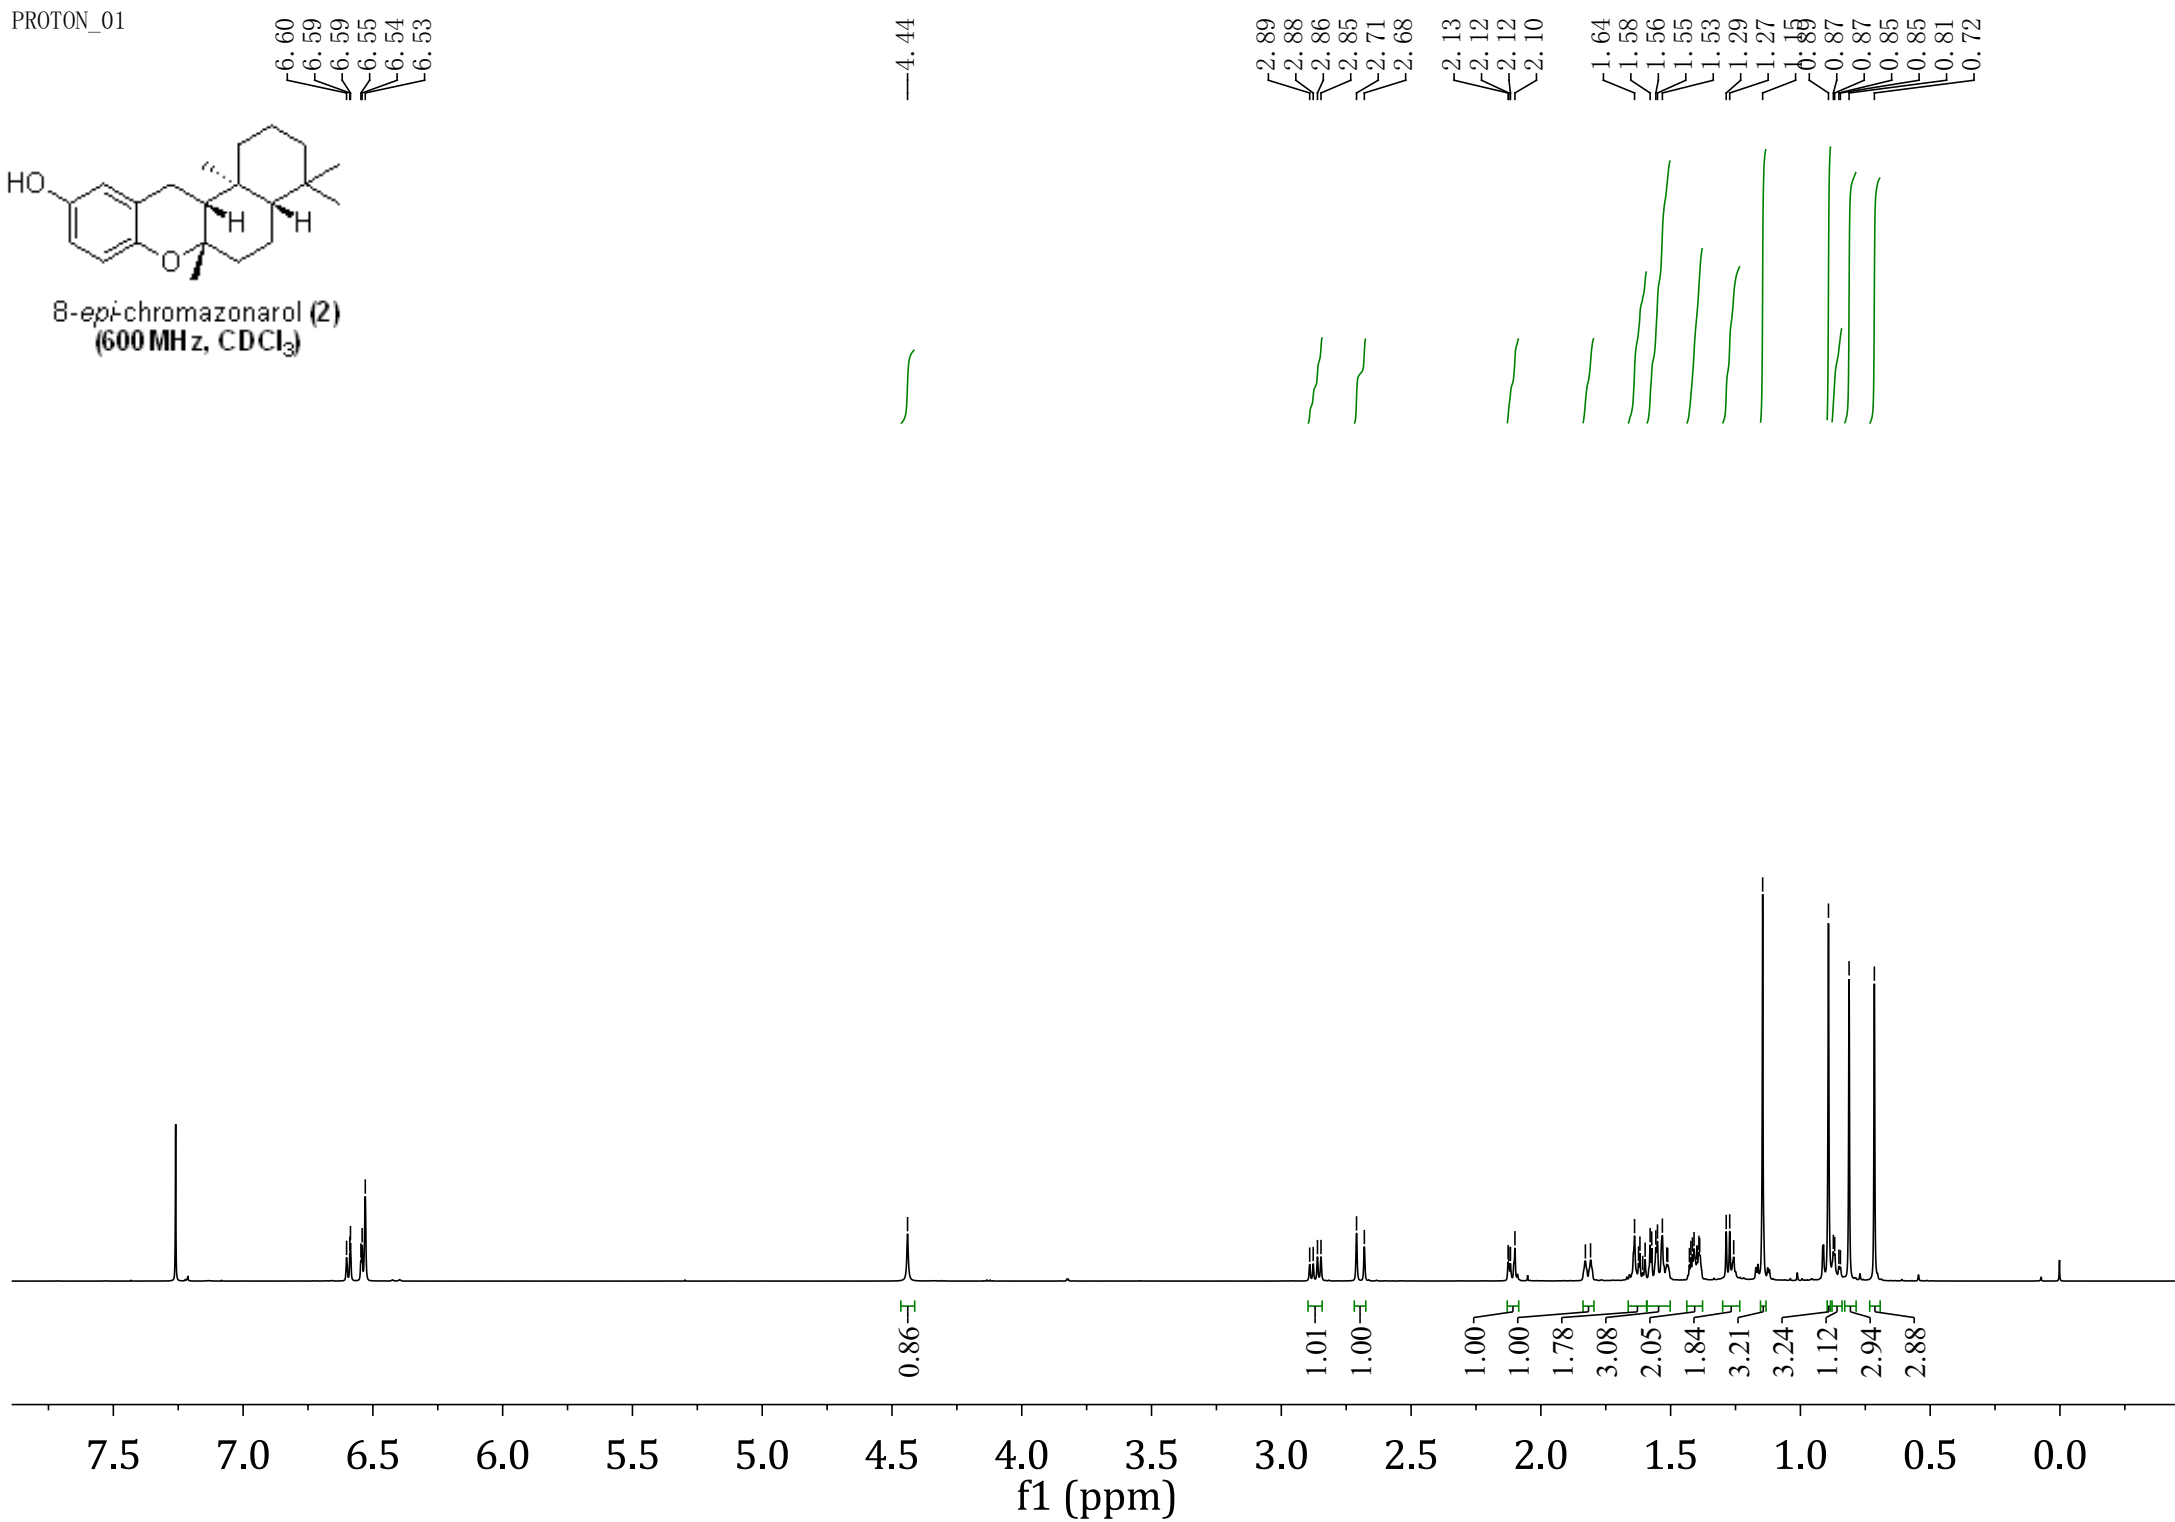



CARBON\_01

148.67  
148.55

123.57

117.55  
114.73  
113.77

75.27

55.32

49.57

41.92  
40.72  
40.05  
38.32  
33.70  
33.22

27.14

22.89  
21.87  
18.46  
18.28  
14.23

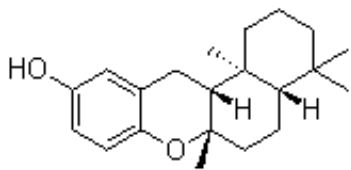

8-*epi*-chromazonarol (2)  
(151MHz, CDCl<sub>3</sub>)

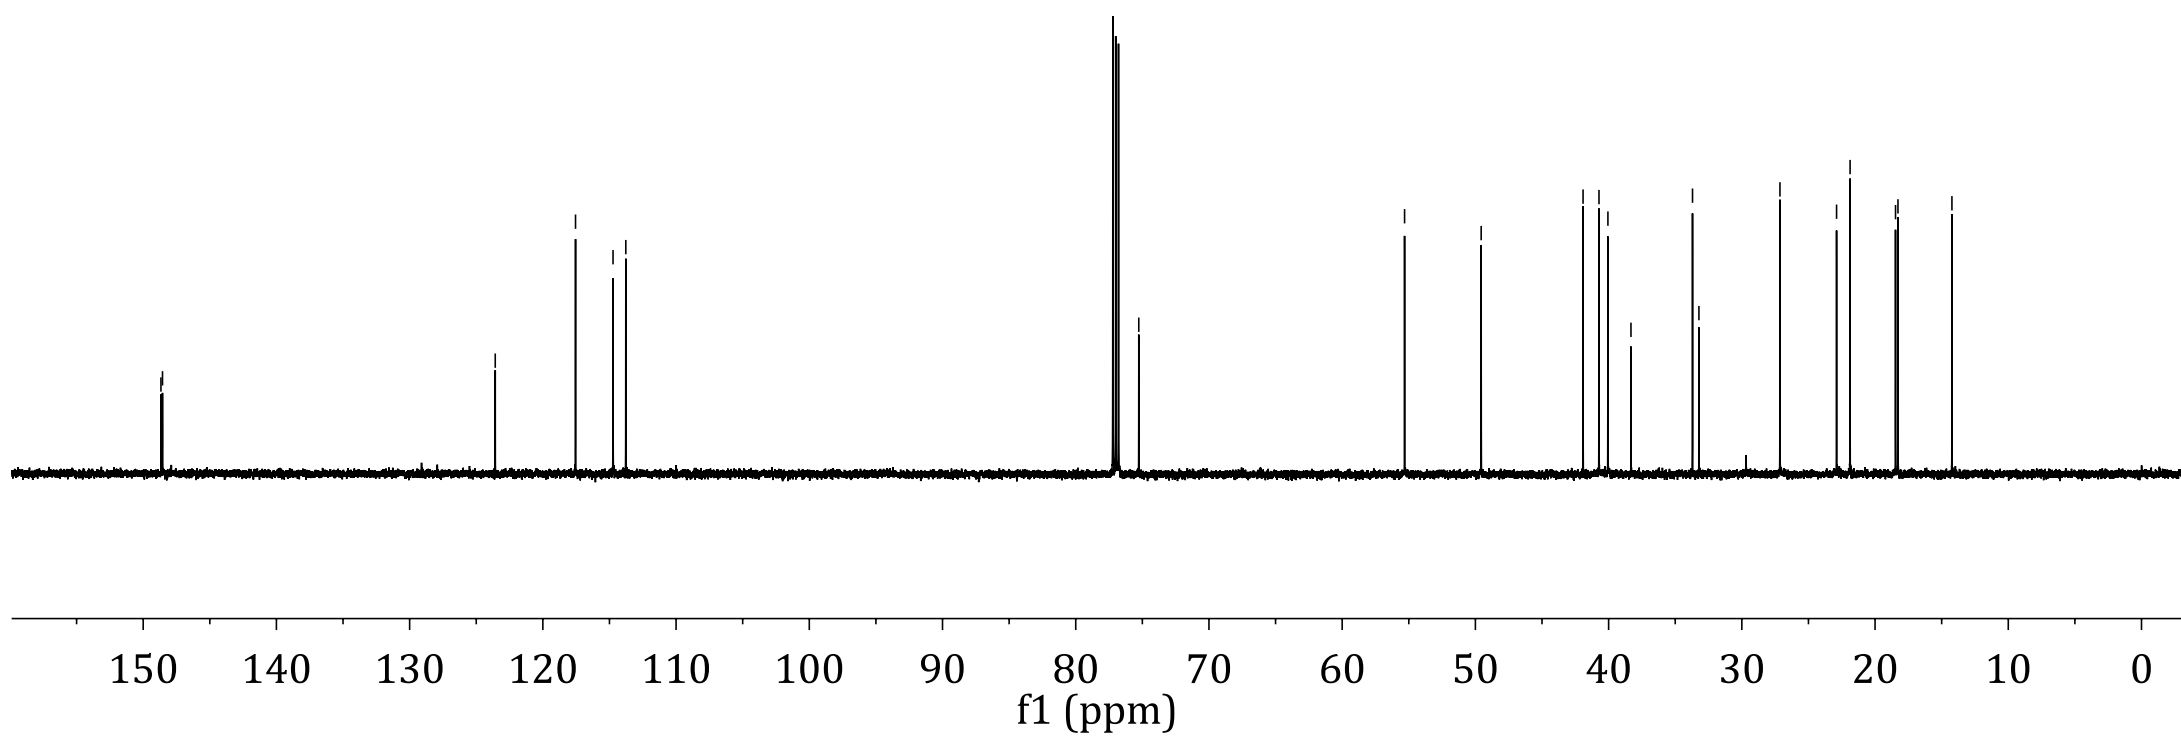

sp-180330-TMdangjing-H  
STANDARD 1H OBSERVE

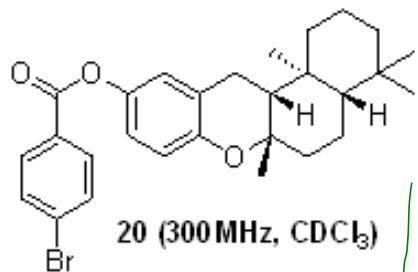

8.05  
8.04  
8.02  
8.02  
8.01  
7.67  
7.65  
7.65  
7.62

6.89  
6.86  
6.85  
6.76  
6.74

2.99  
2.96  
2.93  
2.90  
2.79  
2.73

2.17  
2.14  
2.13

1.61  
1.59  
1.58  
1.56  
1.53  
1.43  
1.42  
1.38  
1.34  
1.31  
1.18  
1.15  
1.09  
0.90  
0.82  
0.73

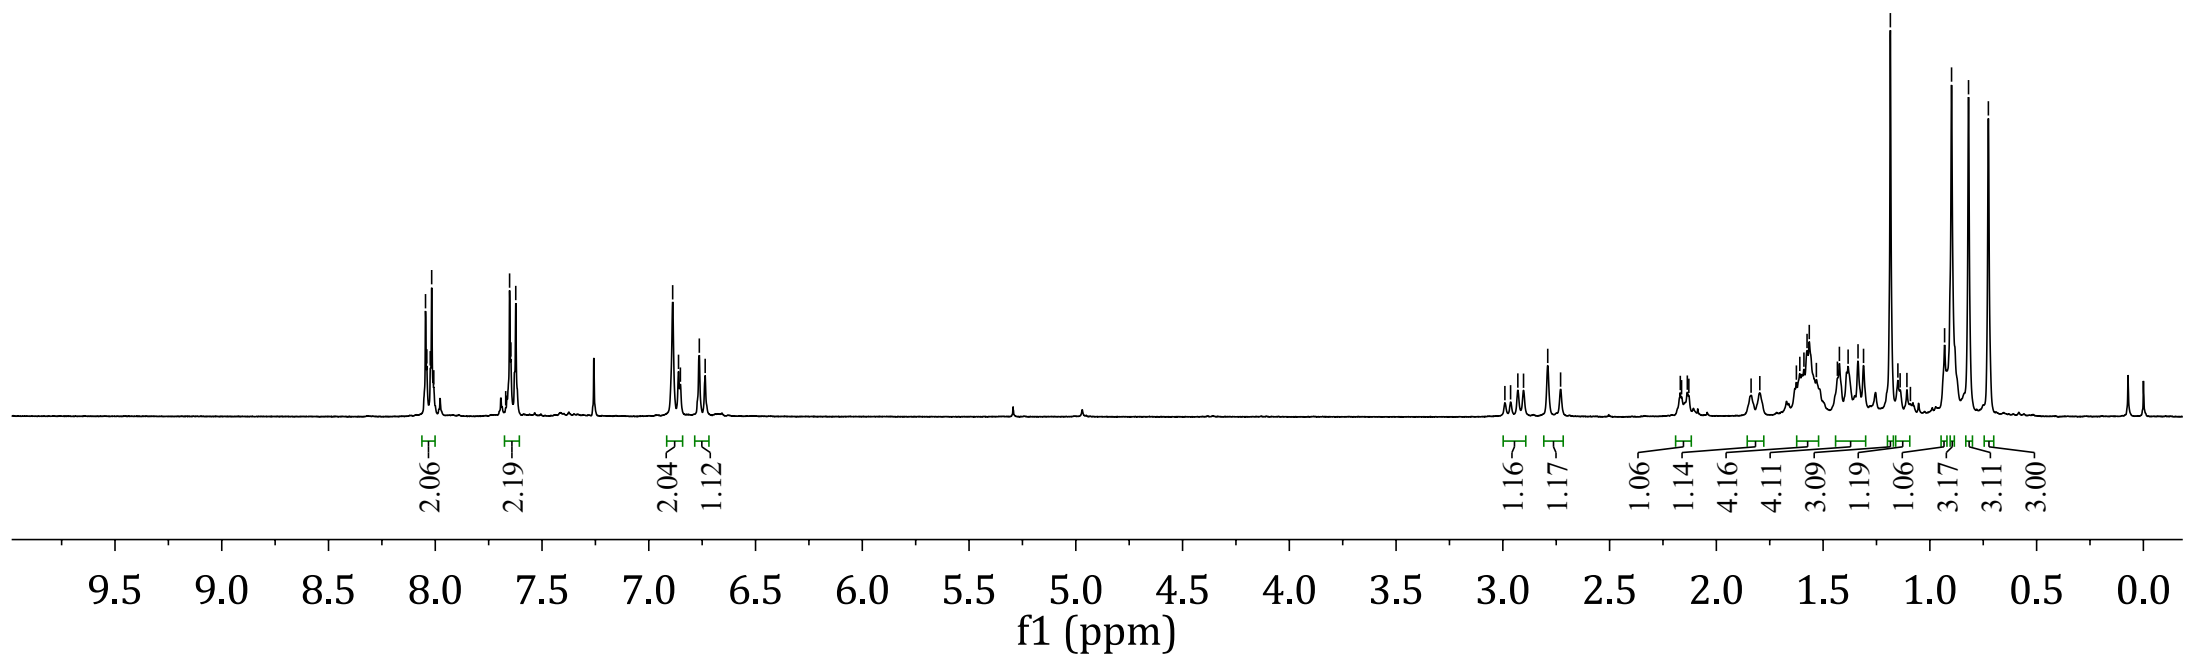

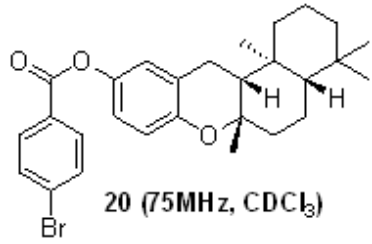

—164.84

—152.55

—143.48

—131.88

—131.56

—128.79

—128.58

—123.52

—121.03

—119.58

—117.65

—75.83

—55.28

—49.37

—41.89

—40.66

—40.03

—38.35

—33.71

—33.23

—27.31

—22.86

—21.90

—18.43

—18.27

—14.33

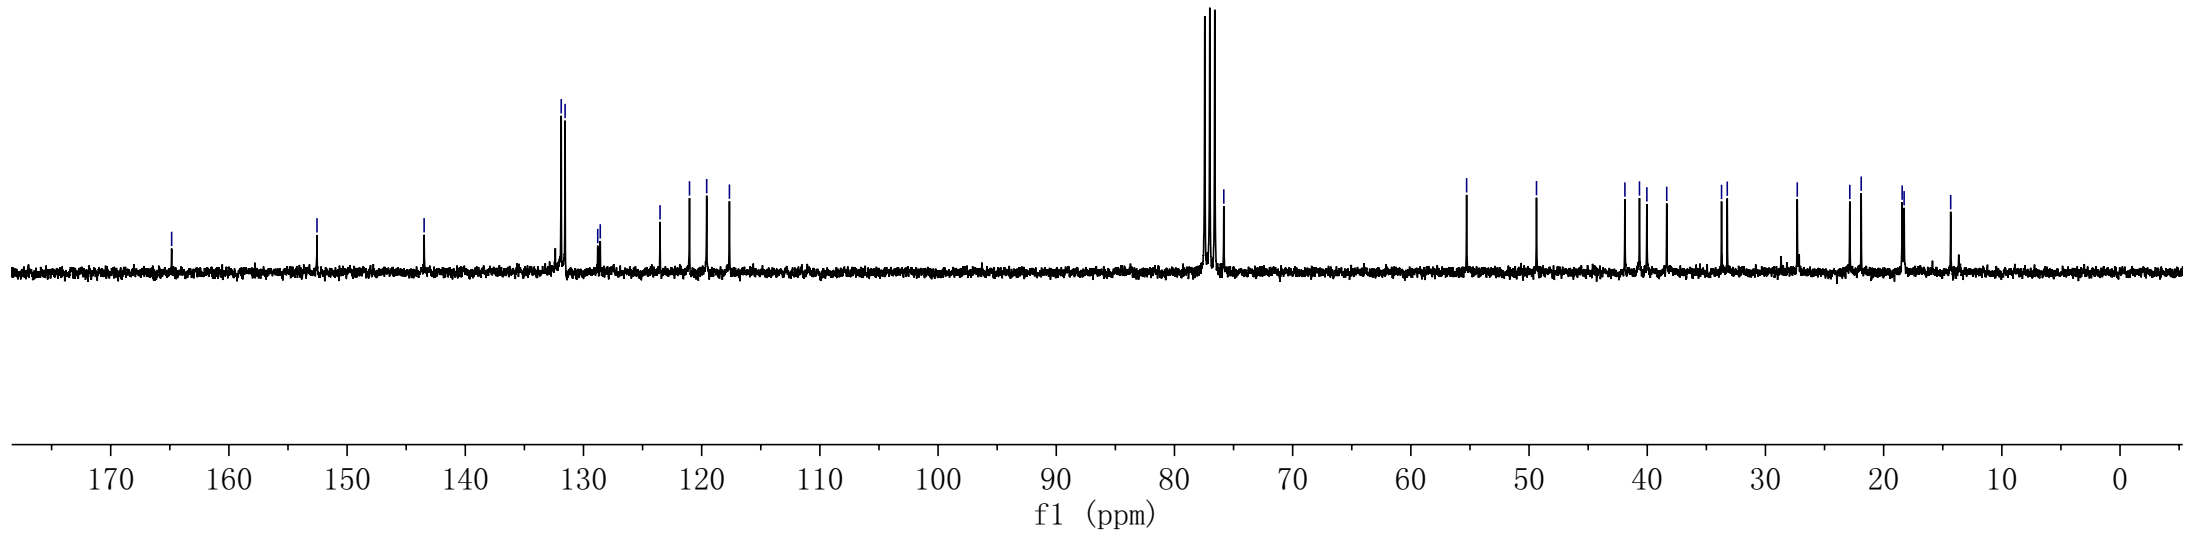

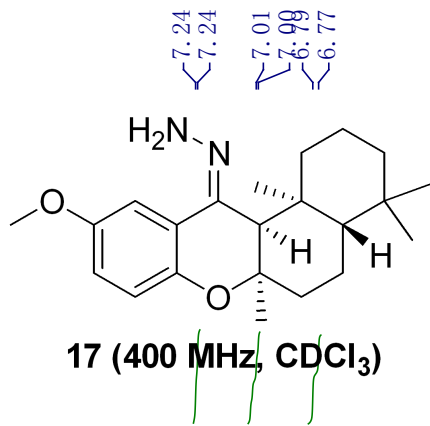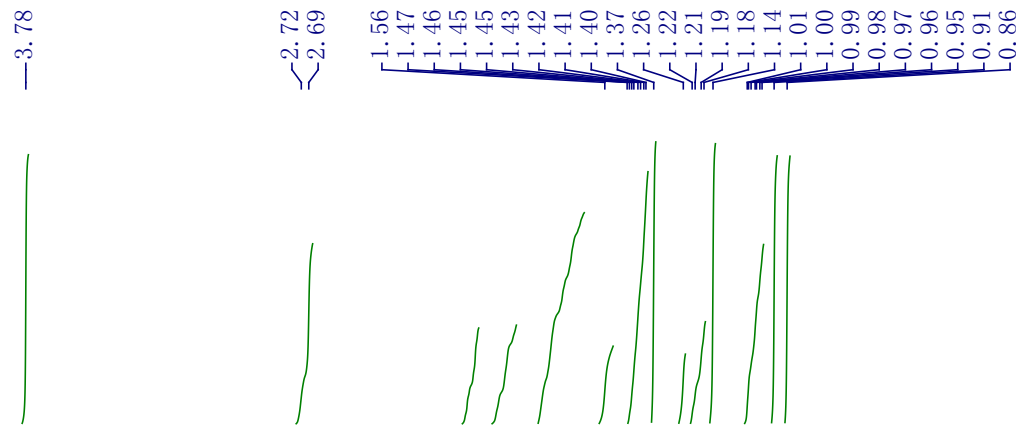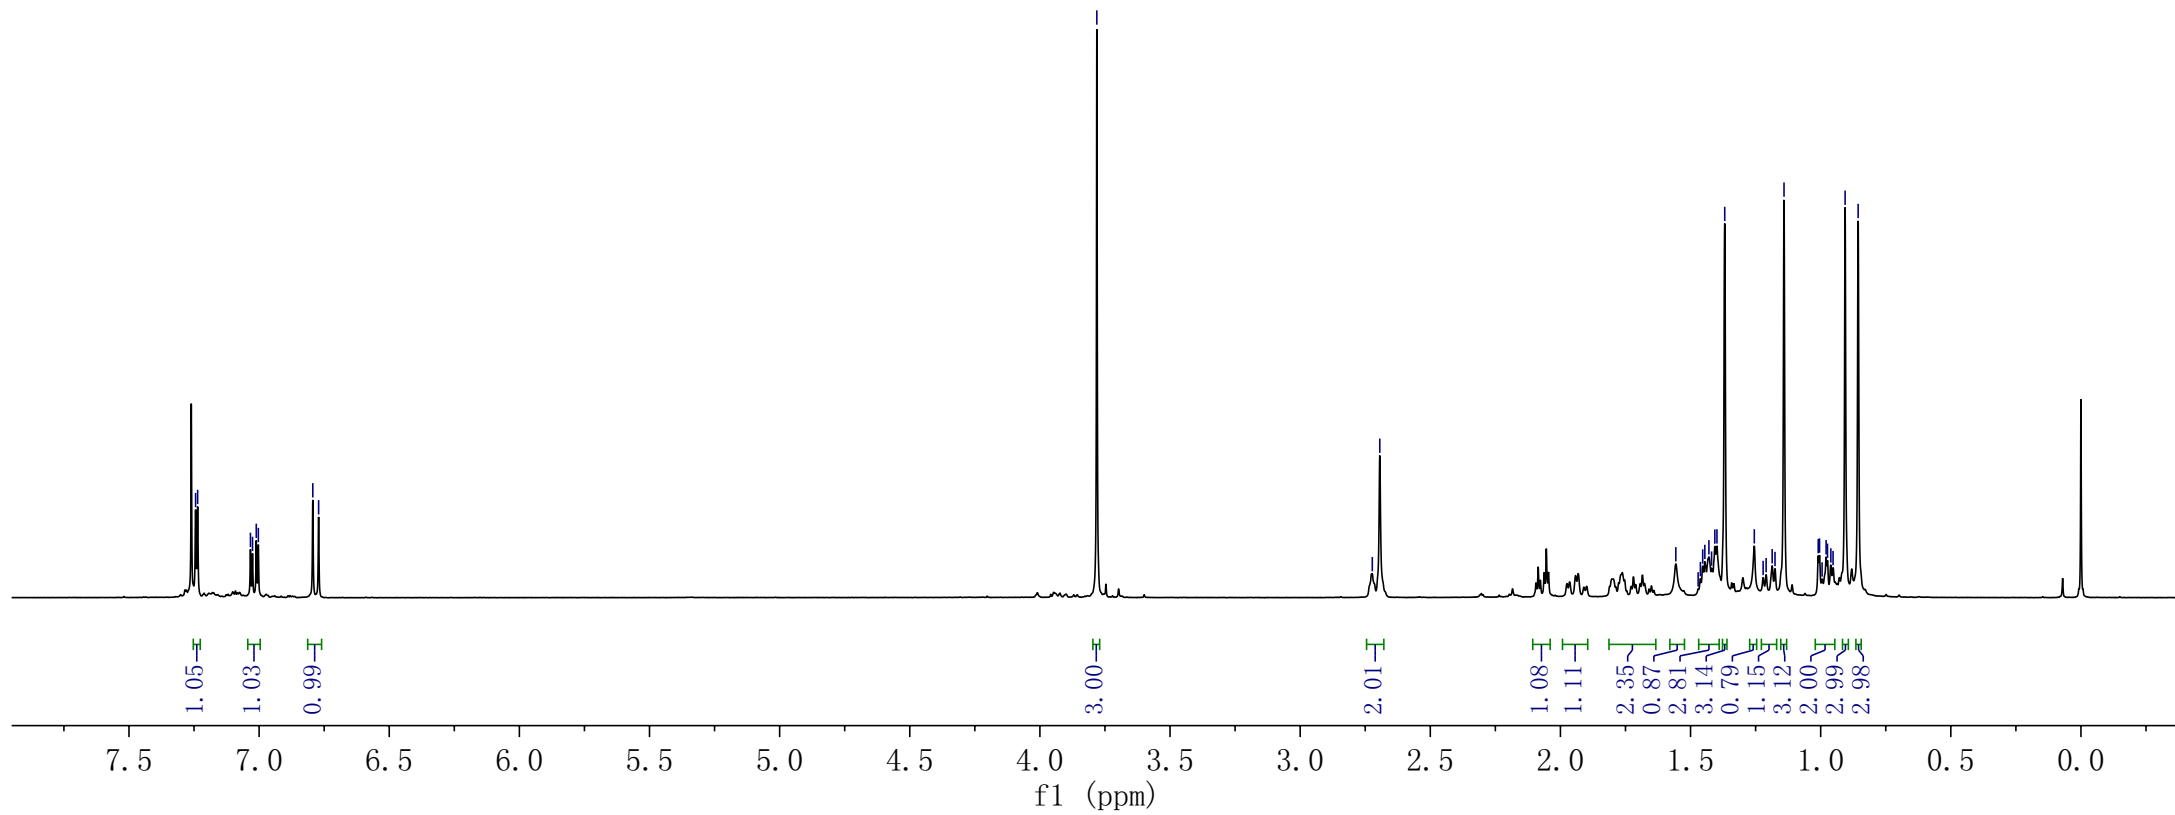

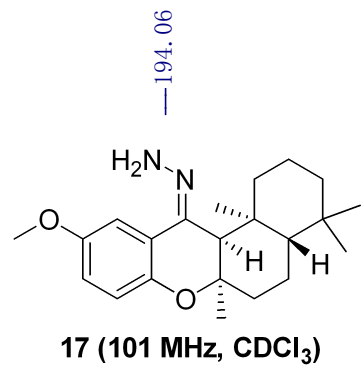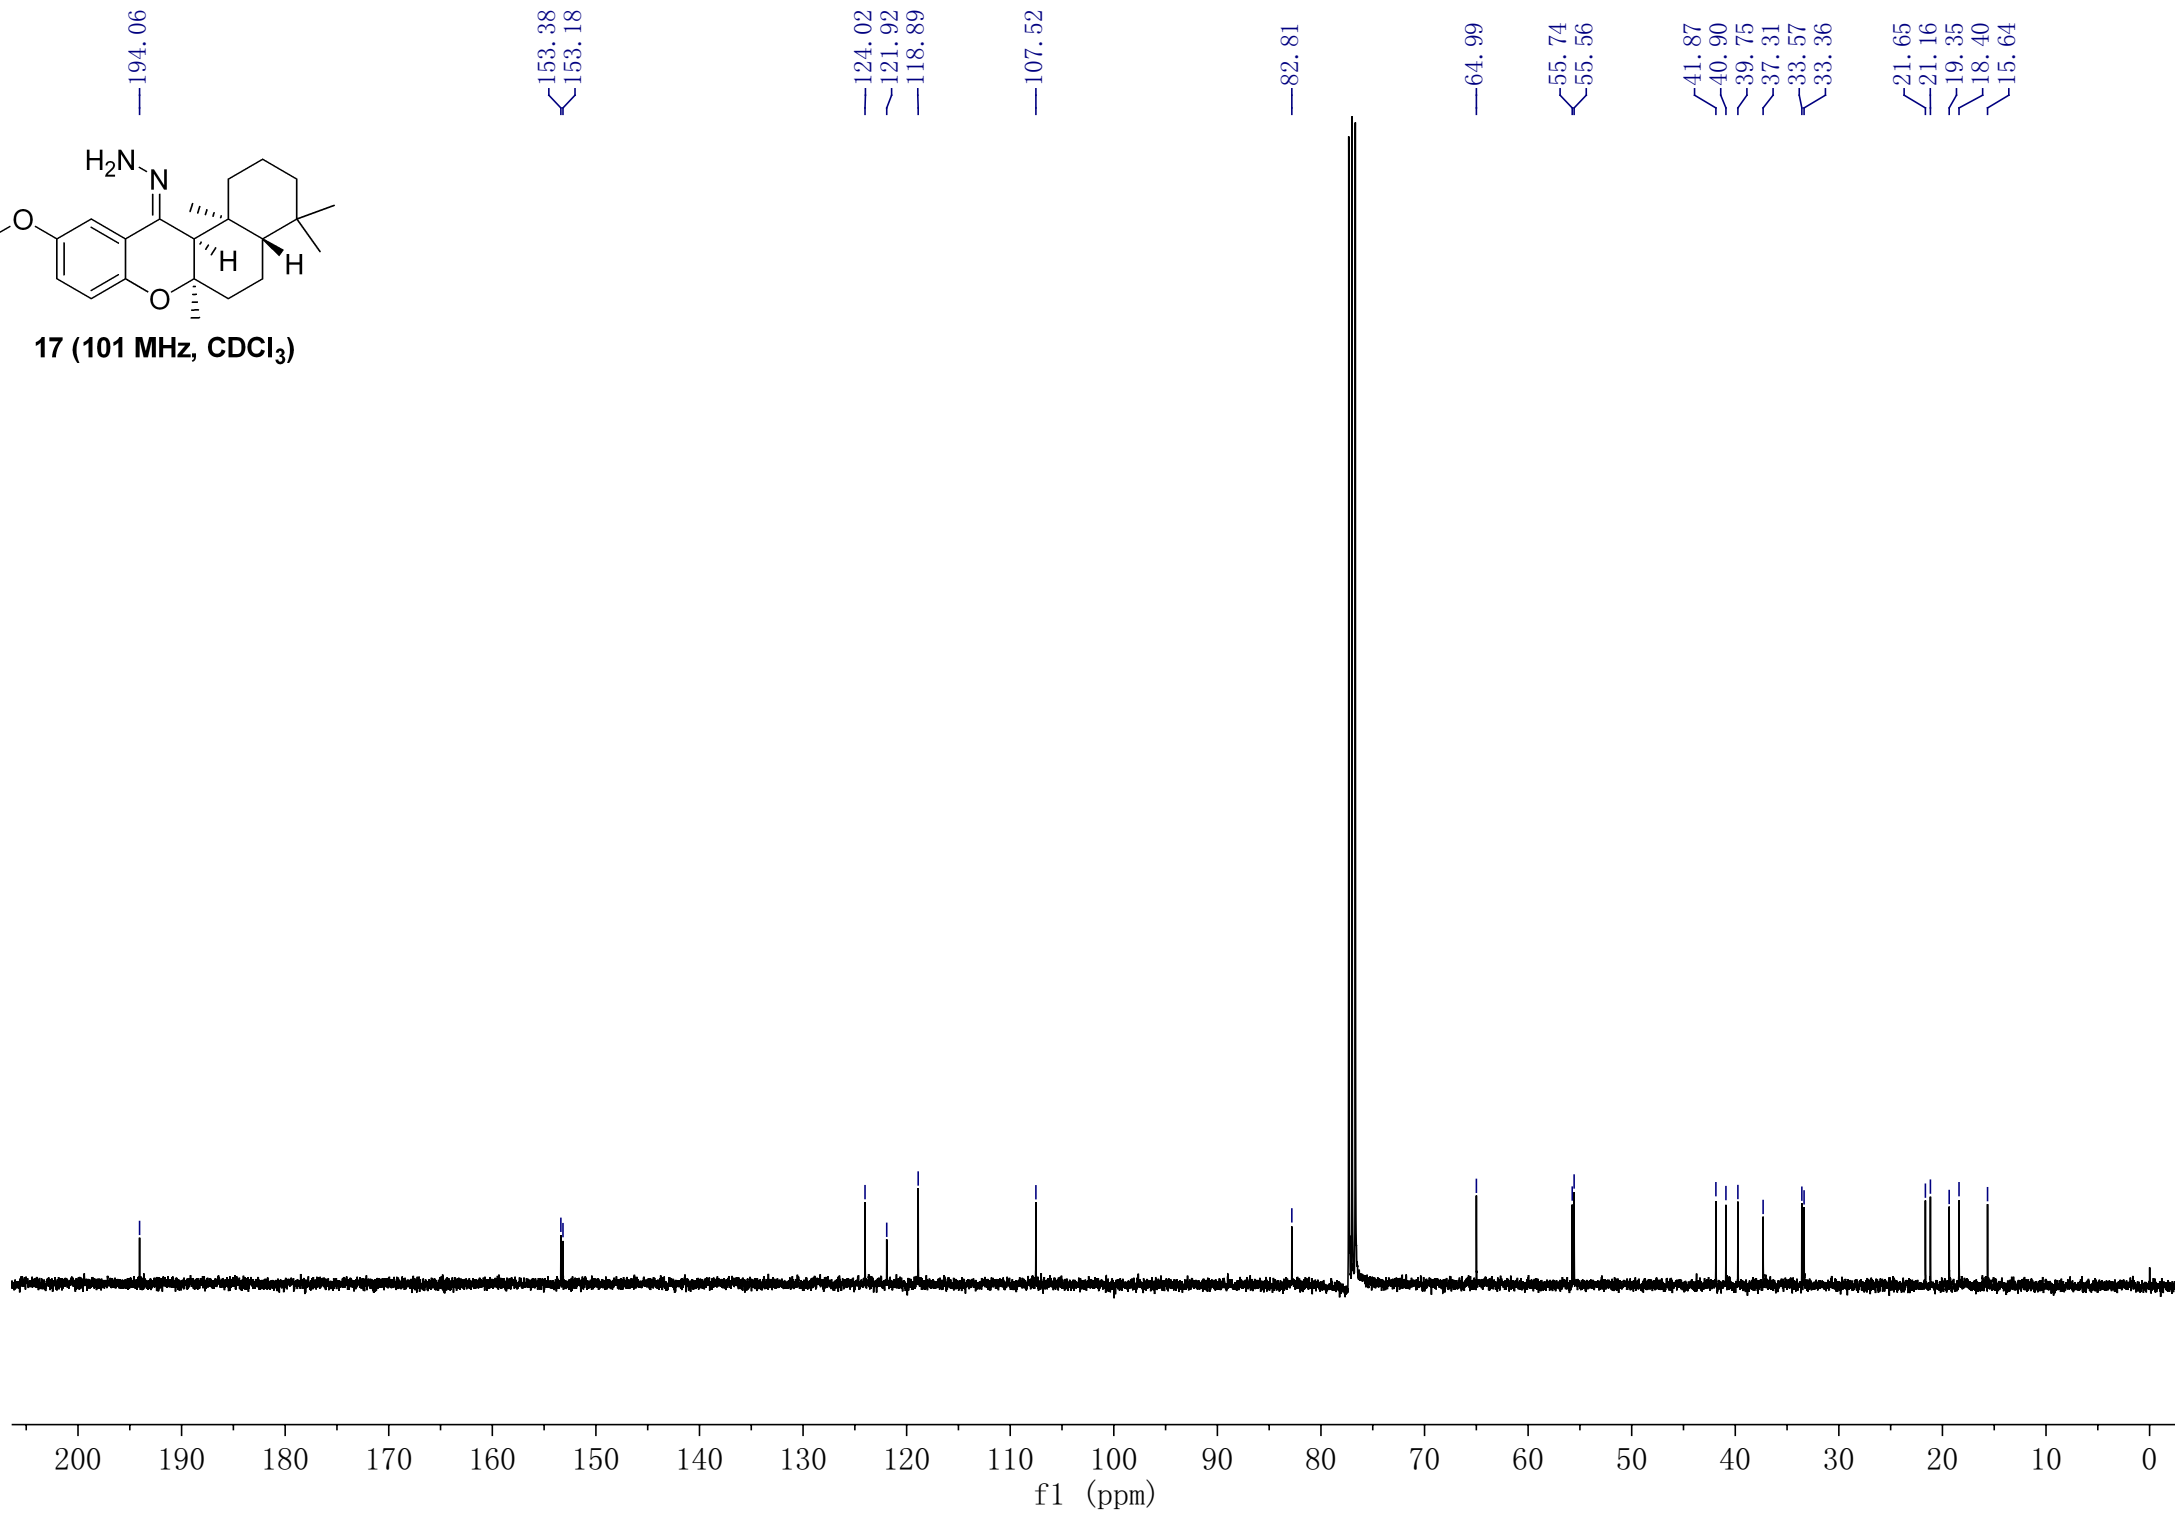

Supplement: c8qo00901e1.pdf [file c8qo00901e1.pdf]
